# Supplementary material for: The Impact of miR-155-5p on Myotube Differentiation: Elucidating Molecular Targets in Skeletal Muscle Disorders
Source: Int J Mol Sci. 2024 Feb 1;25(3):1777. doi: 10.3390/ijms25031777 (PMC10855706; doi:10.3390/ijms25031777)
Supplement: Supplementary file 1 [file ijms-25-01777-s001.zip › ijms-2701703-supplementary-tables.xlsx]

## Sheet: README
Muscle cell atrophy induced by miR-155-5p reveals molecular targets in skeletal muscle disorders Letícia Lopes, Sarah Cury, Diogo de Moraes, Jakeline Santos Oliveira, Grasieli de Oliveira, Otavio Cabral-Marques, Geysson Javier Fernandez, Mario Hiroyuki Hirata, Da-Zhi Wang, Maeli Dal-Pai-Silva, Robson Francisco Carvalho, and Paula Paccielli Freire
Supplementary Tables ST1-ST6
Supplementary Table S1.	Meta Analysis for a forest plot of conditions associated with skeletal muscle with altered miR-155 expression.
Supplementary Table S2.	Differentially Expressed Genes (DEGs) in C2C12 Myotubes after mimic-miR-155.
Supplementary Table S3.	Differently expressed genes in common between C2C12 muscle cells treated with miR-155 and Duchenne muscular dystrophy.
Supplementary Table S4.	Role of important genes directly and indirectly deregulated by miR-155.
Supplementary Table S5.	Normalized Count Table from myoblasts.
Supplementary Table S6.	Normalized Count Table from myotubes.

## Sheet: ST1_Meta Analysis Forest Plot
Supplemental Table ST1_Meta Analysis for a forest plot of conditions associated with skeletal muscle with altered miR-155 expression.
Studies	Autor	Me	Se	Mc	Sc	Ne	Nc
GSE25941	Aging	151.958	226.557	88.0937	63.7691	21	15
GSE1007	DMD (GSE)	142.891	133.761	64.9455	43.618	11	11
GSE5304	EDMD Model	3.94895	7.3223	4.73233	4.59926	6	17
GSE43760	Exercise	4.99167	0.165685	4.98	0.148752	12	12
GSE34388	Desmin-induced atrophy	9.13514	7.82518	3.31191	2.30474	8	10
GSE674	Aging Female	173.375	113.465	183.714	50.6679	8	7
GSE362	Aging Male	204.125	103.17	250.843	122.083	8	7
GSE1776	Model of atrophy	24.825	15.2804	16	17.7231	4	4
GSE12580	MDX Model	3.92864	2.61032	3.99658	1.24095	2	3
GSE3307	BMD	1.47813	0.302327	1	0.250453	6	9
GSE1004	DMD	1.60917	0.235016	1	0.250453	8	9
GSE3307	FSHD	1.59635	0.305902	1	0.250453	9	9
GSE3307	LGMD2A	1.6145	0.24268	1	0.250453	10	9
GSE3307	LGMD2B	1.57038	0.315432	1	0.250453	7	9
Ref. 1	NM	1.41894	0.16793	1	0.250453	9	9
Ref. 2	DM	1.84456	0.381477	1	0.250453	9	9
Unpublished data	MP	1.66124	0.280321	1	0.250453	10	9
GSE3112	PM	2.00429	0.366239	1	0.250453	5	9
GSE3112	IBM	2.05492	0.392115	1	0.250453	6	9
Me = Mean experimental; Se = Standard deviation experimental; Mc = Mean control; Sc = Standard deviation control; Ne = number of pacients in the experimental treatment group; Nc = number of pacients in the control group

## Sheet: ST2_DEGs Myotubes
Supplemental Table ST2_Differentially Expressed Genes (DEGs) in C2C12 Myotubes after mimic-miR-155.
miRNA mmu-miR-155-5p; Specie Mus musculus
id	name	foldChange	log2FoldChange	pvalue
ENSMUSG00000053121	Gm5129	0	0	0.0246191
ENSMUSG00000020096	Tbata	0	0	0.03494
ENSMUSG00000027070	Lrp2	0.0727678	-3.78056	0.0408718
ENSMUSG00000081282	Gm13836	0.0739026	-3.75823	0.0289121
ENSMUSG00000044320	1700001O22Rik	0.119304	-3.06728	0.00731467
ENSMUSG00000045506	A930002H24Rik	0.134313	-2.89633	0.0397839
ENSMUSG00000097954	Gm4217	0.136884	-2.86898	0.0361458
ENSMUSG00000085620	G630018N14Rik	0.137989	-2.85738	0.0496211
ENSMUSG00000059434	Gckr	0.140517	-2.83118	0.0369064
ENSMUSG00000045498	Pcdhb3	0.179941	-2.4744	0.0239239
ENSMUSG00000097711	Gm5523	0.188759	-2.40538	0.0315544
ENSMUSG00000029414	Kntc1	0.190649	-2.39101	0.000257196
ENSMUSG00000028268	Gbp3	0.193546	-2.36925	0.0131464
ENSMUSG00000071478	Hist1h2ad	0.197451	-2.34043	0.0206408
ENSMUSG00000062826	Ces2f	0.205184	-2.28501	0.0383269
ENSMUSG00000030336	Cd27	0.21034	-2.2492	0.0109077
ENSMUSG00000098048	Gm8330	0.215363	-2.21516	0.00252798
ENSMUSG00000083496	Gm11263	0.227853	-2.13383	0.0406238
ENSMUSG00000084849	Gm16105	0.235037	-2.08904	0.0338391
ENSMUSG00000032556	Bfsp2	0.251562	-1.99101	0.0147183
ENSMUSG00000004473	Clec11a	0.262883	-1.92751	0.00975748
ENSMUSG00000020871	Dlx4	0.267436	-1.90274	0.0333245
ENSMUSG00000071568	Gm5874	0.269278	-1.89283	0.00697439
ENSMUSG00000021221	Dpf3	0.272915	-1.87348	0.0331742
ENSMUSG00000001227	Sema6b	0.282367	-1.82435	0.00711764
ENSMUSG00000026622	Nek2	0.29066	-1.7826	0.000406527
ENSMUSG00000086184	Gm12764	0.302129	-1.72676	0.0194601
ENSMUSG00000097162	2310010J17Rik	0.303201	-1.72166	0.0349138
ENSMUSG00000024056	Ndc80	0.306165	-1.70762	0.0197901
ENSMUSG00000050328	Hoxc12	0.310703	-1.68639	0.00140645
ENSMUSG00000023047	Amhr2	0.312877	-1.67633	0.00590751
ENSMUSG00000064220	Hist2h2aa1	0.326817	-1.61344	0.0404935
ENSMUSG00000031842	Pde4c	0.364691	-1.45525	0.0167341
ENSMUSG00000031443	F7	0.36709	-1.4458	0.0175363
ENSMUSG00000076281	Gm24270	0.370612	-1.43202	0.0220224
ENSMUSG00000020897	Aurkb	0.379883	-1.39637	0.00772806
ENSMUSG00000024678	Ms4a4d	0.382607	-1.38607	0.0209366
ENSMUSG00000022033	Pbk	0.382772	-1.38544	0.0190362
ENSMUSG00000073758	Sh3d21	0.386274	-1.3723	0.0196587
ENSMUSG00000067189	Gm7335	0.386958	-1.36975	0.000710653
ENSMUSG00000060727	Gm12571	0.390789	-1.35554	0.000189043
ENSMUSG00000018623	Mmp7	0.414385	-1.27096	0.00131319
ENSMUSG00000048856	Slc25a47	0.423253	-1.24041	0.0218762
ENSMUSG00000047428	Dlk2	0.424789	-1.23518	3.88e-05
ENSMUSG00000077734	Snord83b	0.427612	-1.22563	0.0339933
ENSMUSG00000040204	2810417H13Rik	0.432241	-1.21009	0.0378675
ENSMUSG00000051627	Hist1h1e	0.438614	-1.18898	0.00411564
ENSMUSG00000045826	Ptprcap	0.454122	-1.13885	0.0258952
ENSMUSG00000097775	4931440J10Rik	0.461549	-1.11544	0.0178626
ENSMUSG00000028068	Iqgap3	0.462252	-1.11325	0.00266578
ENSMUSG00000028678	Kif2c	0.46836	-1.09431	0.0297186
ENSMUSG00000097578	Gm26798	0.468825	-1.09288	0.0313446
ENSMUSG00000028989	Angptl7	0.473065	-1.07989	1.49e-05
ENSMUSG00000020330	Hmmr	0.487854	-1.03548	0.0315861
ENSMUSG00000075027	4631405J19Rik	0.488327	-1.03408	0.0254399
ENSMUSG00000029810	Tmem176b	0.494517	-1.01591	0.0409688
ENSMUSG00000057751	Megf6	0.501565	-0.99549	0.0023008
ENSMUSG00000097357	Gm16793	0.512747	-0.963681	0.0245766
ENSMUSG00000048040	Arxes2	0.515414	-0.956197	0.0198429
ENSMUSG00000005410	Mcm5	0.516439	-0.953329	0.00408023
ENSMUSG00000034686	Prr7	0.521301	-0.939812	0.0208779
ENSMUSG00000041431	Ccnb1	0.522882	-0.935442	0.0120516
ENSMUSG00000081249	Gm11517	0.528381	-0.92035	0.0328348
ENSMUSG00000031004	Mki67	0.530397	-0.914854	3.03e-07
ENSMUSG00000097616	1110019D14Rik	0.537862	-0.894692	0.004646
ENSMUSG00000097030	Gm26693	0.542448	-0.882444	0.0332179
ENSMUSG00000075416	Gm14488	0.546961	-0.870489	0.0138176
ENSMUSG00000024301	Kifc5b	0.547771	-0.868356	0.0428427
ENSMUSG00000022021	Diaph3	0.551866	-0.857609	0.000783808
ENSMUSG00000040084	Bub1b	0.55268	-0.855485	0.0370716
ENSMUSG00000006398	Cdc20	0.556146	-0.846464	0.046338
ENSMUSG00000030088	Aldh1l1	0.55779	-0.842205	0.000114241
ENSMUSG00000022385	Gtse1	0.55886	-0.839441	0.000180765
ENSMUSG00000032057	4833427G06Rik	0.562742	-0.829455	0.000319211
ENSMUSG00000030882	Dnhd1	0.563334	-0.827938	0.00100886
ENSMUSG00000001228	Uhrf1	0.568534	-0.81468	0.0128651
ENSMUSG00000045404	Kcnk13	0.570376	-0.810014	0.0130637
ENSMUSG00000094707	A830019P07Rik	0.571149	-0.80806	0.00524099
ENSMUSG00000097595	1500002F19Rik	0.571566	-0.807009	0.0117246
ENSMUSG00000032401	Lctl	0.573641	-0.801779	0.0492634
ENSMUSG00000034947	Tmem106a	0.574712	-0.799088	0.0263659
ENSMUSG00000044313	Mab21l3	0.582431	-0.779841	0.0258595
ENSMUSG00000027699	Ect2	0.584605	-0.774467	0.0157491
ENSMUSG00000042616	Oscp1	0.590232	-0.760645	0.00285435
ENSMUSG00000047246	Hist1h2be	0.59247	-0.755186	3.89e-07
ENSMUSG00000054545	Ugt1a6a	0.596344	-0.745783	0.0410731
ENSMUSG00000092655	Gm25238	0.600328	-0.736178	0.0490696
ENSMUSG00000042417	Ccno	0.600682	-0.735327	0.0260964
ENSMUSG00000072999	Gm15401	0.605604	-0.723554	0.0479328
ENSMUSG00000060032	H2afj	0.611411	-0.709785	0.000205583
ENSMUSG00000002108	Nr1h3	0.615833	-0.69939	0.0216732
ENSMUSG00000036964	Trim17	0.616154	-0.698637	0.0243017
ENSMUSG00000043419	Chd3os	0.61641	-0.698039	0.00931459
ENSMUSG00000016756	Cmah	0.617242	-0.696091	0.00272725
ENSMUSG00000031880	Rrad	0.619881	-0.689936	1.56e-27
ENSMUSG00000029153	Ociad2	0.622727	-0.683329	0.00807388
ENSMUSG00000038550	Ciart	0.624521	-0.679177	0.00138029
ENSMUSG00000097495	Gm26651	0.626555	-0.674488	0.0253527
ENSMUSG00000076617	Ighm	0.626579	-0.674432	1.15e-07
ENSMUSG00000020434	4921536K21Rik	0.626856	-0.673794	0.0116199
ENSMUSG00000055632	Hmcn2	0.628489	-0.670042	0.0134747
ENSMUSG00000052783	Grk4	0.628822	-0.669276	0.0326531
ENSMUSG00000021508	Cxcl14	0.631962	-0.662091	0.00990949
ENSMUSG00000086695	Gm15247	0.63333	-0.658971	0.0308673
ENSMUSG00000025229	Pitx3	0.633798	-0.657905	0.0187596
ENSMUSG00000059089	Fcgr4	0.63596	-0.652992	0.0446588
ENSMUSG00000032492	Pth1r	0.641548	-0.64037	0.0462223
ENSMUSG00000091037	Gm17661	0.642083	-0.639169	0.0423449
ENSMUSG00000030641	Ddias	0.642753	-0.637663	0.00763469
ENSMUSG00000030760	Acer3	0.644849	-0.632966	0.000449009
ENSMUSG00000097971	Gm26917	0.646188	-0.629975	7.38e-10
ENSMUSG00000042918	Mamstr	0.646986	-0.628195	0.0282126
ENSMUSG00000044927	H1fx	0.652606	-0.615716	0.00502101
ENSMUSG00000024790	Sac3d1	0.652621	-0.615682	0.00147326
ENSMUSG00000027794	Sohlh2	0.65324	-0.614315	0.00785803
ENSMUSG00000062743	Zfp677	0.657357	-0.60525	0.0362788
ENSMUSG00000030871	Ears2	0.657594	-0.60473	0.000273114
ENSMUSG00000085912	Trp53cor1	0.663137	-0.592621	0.000245063
ENSMUSG00000097517	Gm26695	0.664755	-0.589105	0.000953668
ENSMUSG00000068744	Psrc1	0.669274	-0.579332	0.000322319
ENSMUSG00000071654	Uqcc3	0.671289	-0.574994	0.00352005
ENSMUSG00000026605	Cenpf	0.671621	-0.57428	0.0342155
ENSMUSG00000046818	Ddit4l	0.672671	-0.572027	0.0169782
ENSMUSG00000025279	Dnase1l3	0.676012	-0.564878	0.0322993
ENSMUSG00000014232	Cluap1	0.676384	-0.564086	0.0066028
ENSMUSG00000021811	Dnajc9	0.679461	-0.557538	0.000410898
ENSMUSG00000060639	Hist1h4i	0.680821	-0.554652	0.0273035
ENSMUSG00000097081	Gm10425	0.683637	-0.548697	0.0171275
ENSMUSG00000000958	Slc7a7	0.683897	-0.548149	0.0238378
ENSMUSG00000040430	Pitpnc1	0.68563	-0.544499	0.0137716
ENSMUSG00000037363	Letm2	0.686973	-0.541676	0.00019738
ENSMUSG00000057093	C030039L03Rik	0.688161	-0.539183	0.0135202
ENSMUSG00000075028	Prdm11	0.692806	-0.529477	0.00724112
ENSMUSG00000035745	Grin3b	0.696177	-0.522473	0.0266989
ENSMUSG00000033170	Card10	0.696373	-0.522068	0.00233092
ENSMUSG00000039670	Oxld1	0.696482	-0.521842	0.0459038
ENSMUSG00000062175	Tgif2	0.697394	-0.519955	0.000224956
ENSMUSG00000021453	Gadd45g	0.702965	-0.508475	3.48e-20
ENSMUSG00000028539	Artn	0.706481	-0.501277	0.039804
ENSMUSG00000020914	Top2a	0.706951	-0.500317	0.00645066
ENSMUSG00000085156	Gm11974	0.708014	-0.498151	2.24e-06
ENSMUSG00000048772	Tmem53	0.708461	-0.49724	0.00278412
ENSMUSG00000021607	Mrpl36	0.710917	-0.492247	0.00147926
ENSMUSG00000064264	Zfp428	0.71096	-0.492159	0.0465354
ENSMUSG00000071653	1810009A15Rik	0.711013	-0.492051	0.00379299
ENSMUSG00000025154	Arhgap19	0.71165	-0.49076	0.0304638
ENSMUSG00000062012	Zfp13	0.712665	-0.488703	0.0422679
ENSMUSG00000030347	D6Wsu163e	0.713898	-0.48621	0.00111022
ENSMUSG00000062944	9130023H24Rik	0.714051	-0.485901	0.00543491
ENSMUSG00000001305	Rrp15	0.717655	-0.478637	0.000635408
ENSMUSG00000070576	Mn1	0.718101	-0.477742	0.0286314
ENSMUSG00000028389	Zfp37	0.719448	-0.475037	0.0327546
ENSMUSG00000086717	Gm15655	0.722277	-0.469375	0.0480086
ENSMUSG00000092381	Gm20512	0.722943	-0.468047	0.036279
ENSMUSG00000028243	Ubxn2b	0.723962	-0.466013	0.0196385
ENSMUSG00000043557	Mdga1	0.723964	-0.466011	0.00155625
ENSMUSG00000043801	Oaz1-ps	0.725896	-0.462164	0.0445967
ENSMUSG00000086903	Hotair	0.725921	-0.462115	0.0194634
ENSMUSG00000042367	Gjb3	0.726795	-0.460379	0.0114755
ENSMUSG00000086839	Gm11973	0.726981	-0.460011	0.00511339
ENSMUSG00000048616	Nog	0.727801	-0.458384	0.0208458
ENSMUSG00000096919	Gm26775	0.727985	-0.458019	0.0304761
ENSMUSG00000038210	Hoxa11	0.728088	-0.457816	2.16e-06
ENSMUSG00000067847	Romo1	0.73086	-0.452334	1.8e-05
ENSMUSG00000037621	Atoh8	0.731945	-0.450193	0.000758306
ENSMUSG00000097048	1600020E01Rik	0.73285	-0.44841	0.0101381
ENSMUSG00000090877	Hspa1b	0.735576	-0.443054	7.41e-06
ENSMUSG00000009633	G0s2	0.735692	-0.442826	0.000490869
ENSMUSG00000037971	1110032A03Rik	0.736683	-0.440883	0.00234138
ENSMUSG00000046546	Fam43a	0.737137	-0.439996	0.000691964
ENSMUSG00000060708	Bloc1s4	0.738504	-0.437323	0.00305938
ENSMUSG00000024590	Lmnb1	0.741549	-0.431386	0.0350821
ENSMUSG00000020889	Nr1d1	0.743076	-0.428418	1.14e-08
ENSMUSG00000038644	Pold1	0.743586	-0.427429	0.0178025
ENSMUSG00000006395	Hyi	0.743764	-0.427083	0.0435015
ENSMUSG00000051029	Serpinb1b	0.744288	-0.426068	0.0488145
ENSMUSG00000020707	Rnf135	0.747939	-0.419008	0.0142189
ENSMUSG00000019102	Aldh3a1	0.749294	-0.416396	0.0328282
ENSMUSG00000025747	Tyms	0.74985	-0.415326	0.0326863
ENSMUSG00000023066	Rttn	0.750038	-0.414965	0.0129273
ENSMUSG00000078485	Plekhn1	0.750119	-0.414809	0.0430204
ENSMUSG00000040181	Fmo1	0.750771	-0.413556	1.91e-06
ENSMUSG00000020829	Slc46a1	0.75232	-0.410582	0.0164083
ENSMUSG00000049538	Adamts16	0.753628	-0.408076	0.000736441
ENSMUSG00000022554	Hgh1	0.755251	-0.404973	0.0048683
ENSMUSG00000097060	Gm26759	0.755996	-0.40355	0.0209708
ENSMUSG00000025591	Tma16	0.756636	-0.402329	0.00171115
ENSMUSG00000051065	Mb21d2	0.756978	-0.401677	0.0109648
ENSMUSG00000097411	B430218F22Rik	0.757796	-0.400118	0.0196834
ENSMUSG00000042831	Alkbh6	0.758546	-0.398692	0.0328579
ENSMUSG00000046229	Scand1	0.758598	-0.398592	0.00703984
ENSMUSG00000028840	Zfp593	0.758759	-0.398286	0.00397613
ENSMUSG00000013150	Gfod2	0.759454	-0.396965	0.0350366
ENSMUSG00000028453	Fancg	0.759975	-0.395976	0.0430399
ENSMUSG00000028540	Dph2	0.760212	-0.395526	0.00963802
ENSMUSG00000097221	1810049J17Rik	0.761043	-0.393951	0.000252177
ENSMUSG00000012296	Tjap1	0.761947	-0.392237	3.76e-11
ENSMUSG00000016239	Lonrf3	0.762069	-0.392007	0.0194166
ENSMUSG00000091306	Gm17606	0.76219	-0.391777	0.0255385
ENSMUSG00000055900	Tmem69	0.762284	-0.391599	0.0117463
ENSMUSG00000052673	Gm9887	0.764152	-0.388069	0.039068
ENSMUSG00000032609	Klhdc8b	0.764562	-0.387295	0.0166862
ENSMUSG00000022323	Hrsp12	0.764694	-0.387045	0.0477508
ENSMUSG00000023571	Fam132a	0.766959	-0.382778	0.0313065
ENSMUSG00000096768	Erdr1	0.767201	-0.382324	0.013338
ENSMUSG00000025971	9430016H08Rik	0.76806	-0.38071	0.00153525
ENSMUSG00000053693	Mast1	0.768309	-0.380242	0.000211563
ENSMUSG00000034321	Exosc1	0.769209	-0.378552	0.00193969
ENSMUSG00000023067	Cdkn1a	0.770719	-0.375724	8.16e-13
ENSMUSG00000006732	Mettl1	0.770954	-0.375283	0.042914
ENSMUSG00000027459	Fam110a	0.774142	-0.369329	0.00740451
ENSMUSG00000051817	Sox12	0.774294	-0.369046	0.0418349
ENSMUSG00000026885	Ttll11	0.774677	-0.368333	0.00382454
ENSMUSG00000040177	2310057M21Rik	0.774764	-0.368171	0.00498665
ENSMUSG00000041623	D11Wsu47e	0.77673	-0.364516	0.0143718
ENSMUSG00000041346	Wrap53	0.776897	-0.364205	0.0299234
ENSMUSG00000037348	Paqr7	0.777023	-0.363971	0.0338758
ENSMUSG00000001656	Hoxc11	0.777045	-0.36393	0.00241573
ENSMUSG00000056228	Cars2	0.777662	-0.362784	0.0274247
ENSMUSG00000004626	Stxbp2	0.777772	-0.362581	0.0194824
ENSMUSG00000000552	Zfp385a	0.778145	-0.36189	0.000960775
ENSMUSG00000048310	Pskh1	0.779719	-0.358975	0.000673766
ENSMUSG00000036777	Anln	0.779817	-0.358793	0.0264982
ENSMUSG00000040586	Ofd1	0.779833	-0.358764	0.0135613
ENSMUSG00000024732	Ccdc86	0.780078	-0.35831	0.000369976
ENSMUSG00000086370	Ftx	0.780401	-0.357713	0.0253449
ENSMUSG00000025464	Paox	0.780651	-0.35725	0.0262391
ENSMUSG00000002393	Nr2f6	0.781542	-0.355604	4.32e-05
ENSMUSG00000070424	Art5	0.783061	-0.352803	0.0453986
ENSMUSG00000063652	Slc22a21	0.783504	-0.351988	0.025898
ENSMUSG00000044876	Zfp444	0.783961	-0.351146	0.00843356
ENSMUSG00000056612	Ppp1r14b	0.784329	-0.35047	1.33e-07
ENSMUSG00000022773	Ypel1	0.78467	-0.349842	0.0402471
ENSMUSG00000033880	Lgals3bp	0.785157	-0.348947	0.00889262
ENSMUSG00000035983	Gm7008	0.786047	-0.347312	0.00447096
ENSMUSG00000004996	Mri1	0.786644	-0.346217	0.0355536
ENSMUSG00000096858	Olfr805	0.786724	-0.346071	0.0472585
ENSMUSG00000037594	BC022687	0.787022	-0.345524	0.00487461
ENSMUSG00000025731	0610011F06Rik	0.787232	-0.345139	0.00989389
ENSMUSG00000032235	Ice2	0.787384	-0.34486	0.014978
ENSMUSG00000027424	Mgme1	0.787492	-0.344662	0.00533094
ENSMUSG00000045763	Basp1	0.787774	-0.344146	0.000236924
ENSMUSG00000029627	Zkscan14	0.788617	-0.342603	0.0440781
ENSMUSG00000039741	Bahcc1	0.788731	-0.342394	2.96e-05
ENSMUSG00000097620	4921514A10Rik	0.78898	-0.341938	0.0195156
ENSMUSG00000027243	Harbi1	0.789132	-0.341661	0.00777872
ENSMUSG00000045176	Borcs6	0.789627	-0.340757	0.00348109
ENSMUSG00000022947	Cbr3	0.790422	-0.339305	0.0189503
ENSMUSG00000054871	Tmem158	0.790634	-0.338918	0.0192991
ENSMUSG00000020160	Meis1	0.791572	-0.337208	0.011489
ENSMUSG00000036678	Aaas	0.792058	-0.336321	0.00130399
ENSMUSG00000034684	Sema3f	0.793357	-0.333959	0.000413341
ENSMUSG00000041845	Rhod	0.793427	-0.33383	0.000482365
ENSMUSG00000015189	Casd1	0.793453	-0.333783	0.0183685
ENSMUSG00000047986	Palm3	0.793747	-0.33325	0.0232848
ENSMUSG00000036214	Znrd1as	0.793823	-0.333112	0.023063
ENSMUSG00000036867	Smad6	0.794432	-0.332004	0.0319928
ENSMUSG00000013822	Elof1	0.794711	-0.331497	0.0313063
ENSMUSG00000028838	Extl1	0.795129	-0.330739	0.0485989
ENSMUSG00000040521	Tsfm	0.79528	-0.330465	0.00637132
ENSMUSG00000051495	Irf2bp2	0.795464	-0.330131	4.27e-05
ENSMUSG00000024132	Eci1	0.796142	-0.328902	0.0452288
ENSMUSG00000025645	Ccdc51	0.796659	-0.327966	0.0338748
ENSMUSG00000029730	Mcm7	0.796833	-0.32765	0.000767902
ENSMUSG00000029554	Mad1l1	0.797775	-0.325946	0.00754211
ENSMUSG00000050732	Vamp8	0.79805	-0.325448	0.00423036
ENSMUSG00000035314	Gdpd5	0.798816	-0.324065	0.000134046
ENSMUSG00000010045	Tmem115	0.798862	-0.323982	0.000113297
ENSMUSG00000025785	Exosc7	0.799613	-0.322626	0.0421587
ENSMUSG00000029725	Ppp1r35	0.799628	-0.322599	0.0480528
ENSMUSG00000028834	Trim63	0.79979	-0.322307	0.000121473
ENSMUSG00000029263	Pigg	0.800173	-0.321616	0.00970494
ENSMUSG00000015312	Gadd45b	0.80018	-0.321604	3.42e-06
ENSMUSG00000067818	Myl9	0.800185	-0.321594	1.1e-05
ENSMUSG00000086322	E130218I03Rik	0.800246	-0.321484	0.0165957
ENSMUSG00000038252	Ncapd2	0.800341	-0.321313	0.0292093
ENSMUSG00000020722	Cacng1	0.800644	-0.320767	5.1e-10
ENSMUSG00000062906	Hdac10	0.801337	-0.319518	0.0158932
ENSMUSG00000028461	Ccdc107	0.801687	-0.318889	0.00156953
ENSMUSG00000042419	Nfkbil1	0.801979	-0.318363	0.0130768
ENSMUSG00000021938	Pspc1	0.803292	-0.316004	0.0181537
ENSMUSG00000001056	Nhp2	0.803514	-0.315606	0.00439772
ENSMUSG00000058761	Rnf169	0.803973	-0.314782	6.26e-05
ENSMUSG00000022074	Tnfrsf10b	0.804461	-0.313905	0.00116785
ENSMUSG00000034203	Chchd4	0.80492	-0.313083	0.00665612
ENSMUSG00000051550	Zfp579	0.806203	-0.310785	0.00220728
ENSMUSG00000036894	Rap2b	0.807021	-0.309322	0.0148231
ENSMUSG00000006800	Sulf2	0.807139	-0.309111	0.00385462
ENSMUSG00000037824	Tspan14	0.809912	-0.304163	9.54e-06
ENSMUSG00000032712	2810474O19Rik	0.810989	-0.302246	2.86e-05
ENSMUSG00000022836	Mylk	0.812153	-0.300177	7.86e-05
ENSMUSG00000023046	Igfbp6	0.812234	-0.300032	0.00100445
ENSMUSG00000080058	Gm11175	0.812598	-0.299387	0.000198776
ENSMUSG00000051154	Commd3	0.813454	-0.297868	1.41e-05
ENSMUSG00000049521	Cdc42ep1	0.813789	-0.297274	8.87e-06
ENSMUSG00000006403	Adamts4	0.81441	-0.296173	9.51e-07
ENSMUSG00000029594	Rbm19	0.814707	-0.295647	0.012237
ENSMUSG00000070462	Mesdc1	0.815254	-0.294678	0.00213986
ENSMUSG00000027298	Tyro3	0.815329	-0.294546	0.0448832
ENSMUSG00000002343	Armc6	0.815425	-0.294376	0.00237225
ENSMUSG00000020388	Pdlim4	0.815661	-0.293959	4.37e-08
ENSMUSG00000017493	Igfbp4	0.816684	-0.29215	0.000210967
ENSMUSG00000010476	Ebf3	0.817171	-0.29129	0.0334316
ENSMUSG00000043872	Zmym1	0.817365	-0.290948	0.0206427
ENSMUSG00000034957	Cebpa	0.817385	-0.290912	0.000752973
ENSMUSG00000097392	D930016D06Rik	0.817765	-0.290241	0.0192847
ENSMUSG00000059430	Actg2	0.817814	-0.290156	0.00158718
ENSMUSG00000017386	Traf4	0.817899	-0.290005	1.37e-06
ENSMUSG00000025069	Gsto2	0.81806	-0.289721	0.0137282
ENSMUSG00000035235	Trim13	0.818386	-0.289147	0.0347421
ENSMUSG00000034685	Fam171a2	0.818662	-0.288661	3.68e-05
ENSMUSG00000023104	Rfc2	0.818801	-0.288416	0.0276007
ENSMUSG00000028211	Trp53inp1	0.819229	-0.28766	0.00406589
ENSMUSG00000024544	Ldlrad4	0.819805	-0.286647	0.037457
ENSMUSG00000015053	Gata2	0.821172	-0.284244	0.00671625
ENSMUSG00000020074	Ccar1	0.82118	-0.28423	0.00295217
ENSMUSG00000004951	Hspb1	0.821466	-0.283727	0.00102386
ENSMUSG00000020773	Trim47	0.821582	-0.283523	0.00370583
ENSMUSG00000049300	Prmt6	0.821787	-0.283164	0.0373145
ENSMUSG00000024909	Efemp2	0.822378	-0.282126	7.15e-05
ENSMUSG00000034333	Zbed4	0.822427	-0.28204	0.0195517
ENSMUSG00000066357	Wdr6	0.822555	-0.281816	0.000577942
ENSMUSG00000038527	C1rl	0.822913	-0.281188	0.00700145
ENSMUSG00000038227	Hoxa9	0.822959	-0.281107	0.0131543
ENSMUSG00000048807	Slc35e4	0.823317	-0.280479	0.000802703
ENSMUSG00000042745	Id1	0.82334	-0.28044	0.0221778
ENSMUSG00000038451	Spsb2	0.823542	-0.280086	0.00210888
ENSMUSG00000058833	2810428I15Rik	0.823813	-0.279612	0.0199989
ENSMUSG00000079588	Tmem182	0.823923	-0.279418	1.7e-05
ENSMUSG00000032812	Arap1	0.823957	-0.279359	0.00673233
ENSMUSG00000054428	Atpif1	0.824221	-0.278897	0.000693089
ENSMUSG00000023018	Smarcd1	0.824362	-0.27865	0.00426728
ENSMUSG00000026036	Nif3l1	0.824592	-0.278247	0.00545604
ENSMUSG00000024841	Eif1ad	0.825059	-0.277431	0.00319909
ENSMUSG00000025157	Zdhhc16	0.82542	-0.276799	0.000271115
ENSMUSG00000036139	Hoxc9	0.825532	-0.276605	0.0249251
ENSMUSG00000006471	Ndor1	0.82564	-0.276416	0.00116877
ENSMUSG00000007836	Hnrnpa0	0.825895	-0.27597	2.86e-06
ENSMUSG00000057137	Tmem140	0.826229	-0.275386	0.000325896
ENSMUSG00000064326	Siva1	0.826233	-0.275379	0.0467097
ENSMUSG00000024414	Mrpl27	0.8268	-0.27439	0.0399097
ENSMUSG00000029673	Auts2	0.827073	-0.273914	0.000562925
ENSMUSG00000061613	U2af1	0.827165	-0.273753	0.000736124
ENSMUSG00000095098	Ccdc85b	0.827815	-0.27262	0.0396962
ENSMUSG00000039356	Exosc2	0.828041	-0.272225	0.0443094
ENSMUSG00000029125	Stx18	0.828047	-0.272215	0.00840245
ENSMUSG00000070003	Ssbp4	0.82827	-0.271827	0.0435587
ENSMUSG00000031283	Chrdl1	0.828475	-0.27147	0.0415087
ENSMUSG00000026459	Myog	0.828572	-0.271301	6.54e-11
ENSMUSG00000040907	Atp1a3	0.829414	-0.269835	0.0112209
ENSMUSG00000037017	Zscan21	0.829619	-0.269479	0.00923934
ENSMUSG00000031821	Gins2	0.829902	-0.268987	0.0293027
ENSMUSG00000036968	Cnpy4	0.829903	-0.268985	0.0233897
ENSMUSG00000039323	Igfbp2	0.829925	-0.268947	0.0318272
ENSMUSG00000014554	Dguok	0.83013	-0.26859	0.0405142
ENSMUSG00000055805	Fmnl1	0.830153	-0.26855	0.0163515
ENSMUSG00000075227	Znhit2	0.83026	-0.268365	0.0434883
ENSMUSG00000060098	Prmt7	0.830599	-0.267777	0.00469973
ENSMUSG00000087366	Junos	0.830885	-0.26728	0.0132637
ENSMUSG00000085587	Gm14493	0.831227	-0.266685	0.00987761
ENSMUSG00000013495	Tmem175	0.831261	-0.266627	0.0134893
ENSMUSG00000069171	Nr2f1	0.831573	-0.266085	0.0379855
ENSMUSG00000019897	Ccdc59	0.831611	-0.26602	0.00322404
ENSMUSG00000095687	Rnaset2a	0.831661	-0.265933	0.0275716
ENSMUSG00000018585	Atox1	0.83204	-0.265276	0.0224765
ENSMUSG00000038248	Sobp	0.832081	-0.265204	0.00749399
ENSMUSG00000030609	Aen	0.832902	-0.263782	2.1e-06
ENSMUSG00000033819	Ppp1r16a	0.832941	-0.263715	0.00443185
ENSMUSG00000031365	Zfp275	1.2	0.263035	0.0010379
ENSMUSG00000030653	Pde2a	1.20008	0.263131	0.0485196
ENSMUSG00000089774	Slc5a3	1.20039	0.263498	0.00514986
ENSMUSG00000025701	Alox5	1.20062	0.263783	0.000535487
ENSMUSG00000029174	Tbc1d1	1.20112	0.264376	9.66e-07
ENSMUSG00000025241	Fyco1	1.20172	0.265103	1.1e-06
ENSMUSG00000032735	Ablim3	1.20174	0.265119	0.0098477
ENSMUSG00000026107	Nabp1	1.2019	0.265312	0.010941
ENSMUSG00000055320	Tead1	1.20193	0.265357	1.58e-07
ENSMUSG00000022425	Enpp2	1.20213	0.265591	0.0294348
ENSMUSG00000034007	Scaper	1.20222	0.265705	0.0390994
ENSMUSG00000037071	Scd1	1.20226	0.265745	1.99e-09
ENSMUSG00000087153	Gm6483	1.20255	0.266095	0.0247001
ENSMUSG00000026728	Vim	1.20381	0.267606	1.22e-07
ENSMUSG00000045664	Cdc42ep2	1.20427	0.268156	0.0345228
ENSMUSG00000097660	Gm26762	1.2044	0.268318	0.00339961
ENSMUSG00000021338	Lrrc16a	1.20493	0.268951	0.019475
ENSMUSG00000059195	Gm12715	1.20498	0.269009	0.0344293
ENSMUSG00000023809	Rps6ka2	1.20518	0.269253	0.00275409
ENSMUSG00000032515	Csrnp1	1.20521	0.26928	0.000232383
ENSMUSG00000054027	Nt5dc3	1.20551	0.269642	3.42e-05
ENSMUSG00000097079	Gm26604	1.20575	0.269932	0.0473231
ENSMUSG00000027330	Cdc25b	1.20602	0.270253	0.046408
ENSMUSG00000028645	Slc2a1	1.20704	0.271477	0.00675651
ENSMUSG00000030987	Stim1	1.20742	0.271925	0.000509712
ENSMUSG00000027506	Tpd52	1.20788	0.27248	0.0387665
ENSMUSG00000045382	Cxcr4	1.20906	0.273884	0.00112489
ENSMUSG00000028328	Tmod1	1.20991	0.274896	3.72e-05
ENSMUSG00000050627	Gpd1l	1.20995	0.274947	0.000250805
ENSMUSG00000031312	Itgb1bp2	1.2102	0.275248	0.000212385
ENSMUSG00000004843	Chmp2b	1.21142	0.276697	0.00314804
ENSMUSG00000030255	Sspn	1.21161	0.276921	2.92e-05
ENSMUSG00000038022	Fam188b	1.21275	0.278283	0.0477175
ENSMUSG00000026211	Obsl1	1.21292	0.278489	2.04e-05
ENSMUSG00000040694	Apobec2	1.21322	0.278839	0.00565
ENSMUSG00000045211	Nudt18	1.21348	0.279152	0.00708016
ENSMUSG00000052397	Ezr	1.21461	0.280491	0.000159852
ENSMUSG00000026202	Tuba4a	1.21468	0.280576	0.00361691
ENSMUSG00000031790	Mmp15	1.21494	0.280889	0.000313939
ENSMUSG00000056124	B4galt6	1.21528	0.281291	0.00128155
ENSMUSG00000044786	Zfp36	1.21543	0.281471	0.0234774
ENSMUSG00000021948	Prkcd	1.21593	0.282064	0.0018196
ENSMUSG00000022064	Pibf1	1.21666	0.28293	0.0248613
ENSMUSG00000028497	Hacd4	1.21718	0.283537	0.00191088
ENSMUSG00000024049	Myom1	1.21782	0.284299	2.51e-06
ENSMUSG00000051000	Fam160a1	1.21926	0.286007	4.96e-05
ENSMUSG00000003955	Fam162a	1.21956	0.286363	1.19e-05
ENSMUSG00000026675	Hsd17b7	1.21969	0.286514	0.00324404
ENSMUSG00000026709	Dars2	1.21978	0.286621	0.00924182
ENSMUSG00000034165	Ccnd3	1.2202	0.287113	4.47e-05
ENSMUSG00000029708	Gcc1	1.22064	0.287641	6.96e-05
ENSMUSG00000022051	Bnip3l	1.22071	0.287726	1.13e-06
ENSMUSG00000001891	Ugp2	1.22111	0.288192	6.28e-05
ENSMUSG00000032020	Ubash3b	1.22127	0.288378	0.00973815
ENSMUSG00000028864	Hgf	1.22132	0.288438	0.0285348
ENSMUSG00000043885	Slc36a4	1.22172	0.288913	0.00677749
ENSMUSG00000019528	Gyg	1.22187	0.289088	2.57e-05
ENSMUSG00000011148	Adssl1	1.22233	0.289635	0.00829354
ENSMUSG00000001270	Ckb	1.2228	0.290186	0.00105615
ENSMUSG00000024799	Tm7sf2	1.22281	0.290205	0.0373714
ENSMUSG00000064356	mt-Atp8	1.22295	0.290366	0.00480148
ENSMUSG00000032305	Fam219b	1.22331	0.290791	0.0248168
ENSMUSG00000050965	Prkca	1.22341	0.290907	0.000275284
ENSMUSG00000020689	Itgb3	1.22385	0.291432	0.000151649
ENSMUSG00000004952	Rasa4	1.22559	0.29348	8.03e-05
ENSMUSG00000034245	Hdac11	1.22589	0.29383	0.0431524
ENSMUSG00000026971	Itgb6	1.22641	0.294443	0.0187094
ENSMUSG00000056220	Pla2g4a	1.22662	0.294691	0.0292326
ENSMUSG00000058135	Gstm1	1.22719	0.295355	0.0237967
ENSMUSG00000018906	P4ha2	1.22723	0.295401	6.44e-05
ENSMUSG00000019970	Sgk1	1.22755	0.295779	3.74e-09
ENSMUSG00000054752	Fsd1l	1.22786	0.29615	0.00517686
ENSMUSG00000000031	H19	1.22794	0.296245	1.09e-08
ENSMUSG00000032845	Alpk2	1.22862	0.297037	0.00637694
ENSMUSG00000002428	Hltf	1.2292	0.297721	0.00474474
ENSMUSG00000038412	Higd1a	1.22947	0.298036	0.00133246
ENSMUSG00000017405	Nek8	1.23128	0.300164	0.0169671
ENSMUSG00000074415	2610203C20Rik	1.23334	0.302567	0.000242581
ENSMUSG00000027470	Mylk2	1.23498	0.304482	0.000366747
ENSMUSG00000043760	Pkhd1	1.2385	0.308597	0.000600242
ENSMUSG00000032267	Usp28	1.23863	0.308745	3.17e-05
ENSMUSG00000025352	Gdf11	1.24141	0.311984	0.000146241
ENSMUSG00000002007	Srpk3	1.24168	0.312299	0.00830712
ENSMUSG00000028128	F3	1.24224	0.312949	0.00211736
ENSMUSG00000021798	Ldb3	1.24242	0.313148	1.36e-05
ENSMUSG00000057280	Musk	1.24263	0.313392	0.00467484
ENSMUSG00000026113	Inpp4a	1.24361	0.314535	0.000775678
ENSMUSG00000051721	BC068281	1.24462	0.315703	0.0326262
ENSMUSG00000031278	Acsl4	1.24548	0.316701	4.66e-07
ENSMUSG00000033207	Mamdc2	1.2456	0.316841	0.00671645
ENSMUSG00000015850	Adamtsl4	1.2463	0.31765	0.0206823
ENSMUSG00000042010	Acacb	1.24647	0.31785	0.0243457
ENSMUSG00000022636	Alcam	1.24727	0.318772	0.0165451
ENSMUSG00000003865	Gys1	1.24774	0.319322	2.71e-08
ENSMUSG00000020354	Sgcd	1.24919	0.320997	0.00581405
ENSMUSG00000034640	Tiparp	1.24963	0.321506	1.37e-06
ENSMUSG00000080316	Spaca6	1.24995	0.321869	0.0218066
ENSMUSG00000018893	Mb	1.24998	0.321908	0.00359139
ENSMUSG00000029217	Tec	1.25068	0.322708	0.0190857
ENSMUSG00000031347	Cetn2	1.25068	0.322718	0.0112001
ENSMUSG00000020572	Nampt	1.25162	0.323792	2.09e-05
ENSMUSG00000051985	Igfn1	1.25315	0.325563	0.00573965
ENSMUSG00000033065	Pfkm	1.25385	0.326361	0.000217614
ENSMUSG00000001156	Mxd1	1.25429	0.326872	0.000552105
ENSMUSG00000047248	C2cd3	1.25455	0.327168	0.004093
ENSMUSG00000027684	Mecom	1.25486	0.327527	0.0150342
ENSMUSG00000024776	Stambpl1	1.25533	0.328061	0.00845597
ENSMUSG00000027221	Chst1	1.25769	0.330773	0.0164935
ENSMUSG00000025175	Fn3k	1.25827	0.331436	0.00242804
ENSMUSG00000032238	Rora	1.25895	0.332217	0.00824656
ENSMUSG00000024059	Clip4	1.25929	0.332616	0.000397605
ENSMUSG00000028525	Pde4b	1.26214	0.335874	5.57e-05
ENSMUSG00000030996	Art1	1.26309	0.336956	0.00943857
ENSMUSG00000000567	Sox9	1.26392	0.3379	0.000246211
ENSMUSG00000000058	Cav2	1.26443	0.338483	0.00158331
ENSMUSG00000039384	Dusp10	1.26481	0.338921	1.19e-05
ENSMUSG00000018500	Adora2b	1.26555	0.339762	0.00825382
ENSMUSG00000041836	Ptpre	1.26637	0.340702	0.0295554
ENSMUSG00000026062	Slc9a2	1.26683	0.341222	0.000768531
ENSMUSG00000040836	Gpr161	1.26686	0.341257	0.0156525
ENSMUSG00000050556	Kcnb1	1.26789	0.342433	0.0477791
ENSMUSG00000058443	Rpl10-ps3	1.26818	0.342761	0.0196622
ENSMUSG00000057036	Gm7536	1.26876	0.343414	0.0489438
ENSMUSG00000004032	Gstm5	1.26879	0.343449	0.00479787
ENSMUSG00000047767	Atg16l2	1.2702	0.345055	0.0163259
ENSMUSG00000024593	Megf10	1.27108	0.346055	8.83e-09
ENSMUSG00000027227	Sord	1.2721	0.347207	2.54e-05
ENSMUSG00000041696	Rasl12	1.27498	0.35048	0.0117931
ENSMUSG00000098609	Anxa11os	1.27603	0.351665	0.0293546
ENSMUSG00000042705	Commd10	1.27759	0.353426	0.0282408
ENSMUSG00000026447	Pik3c2b	1.27777	0.353632	0.0307982
ENSMUSG00000021831	Ero1l	1.2778	0.353656	1.21e-06
ENSMUSG00000022754	Tmem45a	1.27901	0.355028	3.22e-05
ENSMUSG00000049232	Tigd2	1.2805	0.356705	0.000649168
ENSMUSG00000022707	Gbe1	1.28156	0.357902	0.0286843
ENSMUSG00000027894	Slc6a17	1.28163	0.357984	0.00134556
ENSMUSG00000022371	Col14a1	1.28168	0.358039	3.77e-05
ENSMUSG00000006494	Pdk1	1.28169	0.358045	4.21e-11
ENSMUSG00000098816	Gm27786	1.28187	0.358246	1.52e-08
ENSMUSG00000081406	Rps6-ps4	1.28254	0.359005	0.0228007
ENSMUSG00000032549	Rab6b	1.28344	0.360021	0.0353644
ENSMUSG00000026407	Cacna1s	1.28532	0.362131	0.000458005
ENSMUSG00000025791	Pgm2	1.28554	0.362379	7.64e-07
ENSMUSG00000020718	Polg2	1.28717	0.364198	0.0300535
ENSMUSG00000026764	Kif5c	1.28807	0.365206	0.00324537
ENSMUSG00000055493	Epm2a	1.28841	0.365589	0.00333253
ENSMUSG00000047793	Sned1	1.28986	0.36721	0.0107668
ENSMUSG00000048550	Thnsl1	1.29193	0.369533	0.00506644
ENSMUSG00000071637	Cebpd	1.29276	0.370457	7.66e-05
ENSMUSG00000050299	Gm9843	1.29346	0.371234	0.0405419
ENSMUSG00000097089	Gm26879	1.29464	0.37255	0.0450761
ENSMUSG00000041731	Pgm5	1.29466	0.372575	4.22e-07
ENSMUSG00000021250	Fos	1.29694	0.37511	0.00987766
ENSMUSG00000039496	Cdnf	1.29909	0.377504	0.00627889
ENSMUSG00000004267	Eno2	1.2994	0.377843	1.91e-05
ENSMUSG00000040473	Cfap69	1.29982	0.378312	0.0361989
ENSMUSG00000027339	Rassf2	1.30556	0.384666	0.0238852
ENSMUSG00000026786	Apbb1ip	1.30723	0.386518	0.000435249
ENSMUSG00000044258	Ctla2a	1.30741	0.386708	6.64e-07
ENSMUSG00000030268	Bcat1	1.30832	0.387715	0.0188101
ENSMUSG00000061451	Tmem151a	1.30875	0.388184	0.00210705
ENSMUSG00000056758	Hmga2	1.31052	0.390138	0.000526625
ENSMUSG00000032068	Plet1	1.31143	0.391145	0.044013
ENSMUSG00000063663	Brwd3	1.31193	0.391688	0.00151812
ENSMUSG00000024558	Mapk4	1.31327	0.393163	0.0127442
ENSMUSG00000038239	Hrc	1.31356	0.393483	6.19e-10
ENSMUSG00000025321	Itgb8	1.314	0.393964	0.00868242
ENSMUSG00000092006	Gm17139	1.31439	0.394394	0.0243028
ENSMUSG00000031342	Gpm6b	1.32318	0.404004	0.00119307
ENSMUSG00000087591	Gm14635	1.32352	0.404384	0.00114212
ENSMUSG00000039697	Ncoa7	1.32441	0.405348	0.00198055
ENSMUSG00000030727	Rabep2	1.32463	0.405593	0.000928629
ENSMUSG00000030730	Atp2a1	1.32639	0.407501	9.49e-05
ENSMUSG00000076441	Ass1	1.32646	0.407577	0.00141332
ENSMUSG00000041974	Spidr	1.33129	0.412822	0.000607455
ENSMUSG00000021884	Hacl1	1.33271	0.414367	0.0207362
ENSMUSG00000078185	Chml	1.33404	0.415804	0.0177585
ENSMUSG00000038403	Hfe2	1.33486	0.416684	2.03e-08
ENSMUSG00000023328	Ache	1.33558	0.417467	0.0267494
ENSMUSG00000025203	Scd2	1.33725	0.419274	1.39e-14
ENSMUSG00000016552	Foxred2	1.33846	0.420574	0.000161038
ENSMUSG00000026773	Pfkfb3	1.33899	0.421149	0.000150718
ENSMUSG00000044024	Rell2	1.33961	0.421811	0.0380092
ENSMUSG00000032652	Crebl2	1.34016	0.422401	0.00327411
ENSMUSG00000097224	Gm26716	1.34452	0.427089	0.0146904
ENSMUSG00000038296	Galnt18	1.34494	0.427539	0.0119145
ENSMUSG00000084416	Rpl10a-ps1	1.34517	0.427787	0.021752
ENSMUSG00000044288	Cnr1	1.34731	0.430079	0.0174609
ENSMUSG00000078566	Bnip3	1.35079	0.433801	1.14e-16
ENSMUSG00000051098	Mblac2	1.3589	0.442441	0.0449585
ENSMUSG00000042842	Serpinb6b	1.36339	0.447195	0.0052215
ENSMUSG00000013089	Etv5	1.36354	0.447352	0.000646282
ENSMUSG00000084319	Tpt1-ps3	1.36668	0.450675	0.000107186
ENSMUSG00000074652	Myh7b	1.36824	0.452317	0.0371552
ENSMUSG00000036086	Zranb3	1.37255	0.456859	0.0308003
ENSMUSG00000060716	Plekhh1	1.37346	0.457813	2.02e-05
ENSMUSG00000065947	mt-Nd4l	1.37372	0.458086	0.0134807
ENSMUSG00000021097	Clmn	1.37428	0.458679	0.00123078
ENSMUSG00000042895	Abra	1.37619	0.460676	0.00606014
ENSMUSG00000021903	Galnt15	1.37637	0.460873	0.00202154
ENSMUSG00000029312	Klhl8	1.3775	0.46205	0.00399598
ENSMUSG00000064372	mt-Tp	1.37814	0.462726	0.00163041
ENSMUSG00000017724	Etv4	1.37856	0.46316	0.0415778
ENSMUSG00000023243	Kcnk5	1.38055	0.465239	0.00381174
ENSMUSG00000078862	Gm14326	1.3822	0.46697	0.0401866
ENSMUSG00000022797	Tfrc	1.38381	0.468641	2.21e-10
ENSMUSG00000024235	Map3k8	1.38765	0.472644	0.00584046
ENSMUSG00000079110	Capn3	1.38842	0.473447	3.87e-05
ENSMUSG00000015568	Lpl	1.39157	0.476711	0.00569515
ENSMUSG00000027368	Dusp2	1.39506	0.480329	0.0377957
ENSMUSG00000025789	St8sia2	1.39513	0.480395	1.44e-05
ENSMUSG00000037580	Gch1	1.40488	0.490451	0.0291149
ENSMUSG00000048371	Pdp2	1.4051	0.49067	0.00903518
ENSMUSG00000051107	Gm15440	1.4066	0.492216	0.000413624
ENSMUSG00000022096	Hr	1.41114	0.496863	0.000158735
ENSMUSG00000027208	Fgf7	1.41906	0.50494	0.00964343
ENSMUSG00000082016	Pgam1-ps2	1.4228	0.508736	0.0153723
ENSMUSG00000097340	Gm26617	1.42488	0.51084	0.0243978
ENSMUSG00000052353	Cemip	1.42526	0.511223	0.000128549
ENSMUSG00000028527	Ak4	1.43101	0.517038	1.26e-05
ENSMUSG00000039253	Fn3krp	1.43323	0.519267	0.00566327
ENSMUSG00000058454	Dhcr7	1.43435	0.520397	4.59e-09
ENSMUSG00000021815	Mss51	1.43558	0.521631	0.00661298
ENSMUSG00000084911	Gm16185	1.43845	0.524514	0.00671088
ENSMUSG00000031647	Mfap3l	1.44138	0.527454	1.71e-12
ENSMUSG00000001027	Scn4a	1.44491	0.530978	3.49e-05
ENSMUSG00000027562	Car2	1.44711	0.533176	0.00217881
ENSMUSG00000027173	Depdc7	1.44971	0.535764	0.0284363
ENSMUSG00000023019	Gpd1	1.45153	0.537578	0.0396402
ENSMUSG00000044770	Scml4	1.45194	0.537982	1.43e-05
ENSMUSG00000097131	D230017M19Rik	1.45244	0.538482	0.0249785
ENSMUSG00000086583	Gm15500	1.4555	0.541519	5.59e-05
ENSMUSG00000046186	Cd109	1.46083	0.546788	2.17e-07
ENSMUSG00000007682	Dio2	1.46124	0.547193	4.7e-24
ENSMUSG00000003153	Slc2a3	1.46134	0.547297	0.00245985
ENSMUSG00000084960	B430010I23Rik	1.46232	0.548256	0.0234034
ENSMUSG00000071856	Mcc	1.46557	0.551464	0.000101451
ENSMUSG00000007034	Slc44a4	1.46954	0.555368	0.0066518
ENSMUSG00000002831	Plin4	1.47023	0.556042	0.02514
ENSMUSG00000058174	Gm5148	1.47288	0.558638	0.0479067
ENSMUSG00000041886	Macc1	1.47813	0.563776	0.0290304
ENSMUSG00000026109	Tmeff2	1.49086	0.576148	0.00190562
ENSMUSG00000048572	Tmem252	1.49178	0.577031	0.00250556
ENSMUSG00000038775	Vill	1.49409	0.579267	0.0288694
ENSMUSG00000078190	Dnm3os	1.49461	0.579767	0.00020151
ENSMUSG00000028927	Padi2	1.49897	0.583968	2.87e-19
ENSMUSG00000029403	Cdkl2	1.5003	0.585254	0.0066179
ENSMUSG00000038843	Gcnt1	1.50242	0.58729	0.0455056
ENSMUSG00000097652	Mhrt	1.50353	0.588358	0.000767274
ENSMUSG00000038732	Mboat1	1.52849	0.612111	0.0181318
ENSMUSG00000079297	Gm2223	1.53566	0.618857	0.0428984
ENSMUSG00000091421	Gm4202	1.54664	0.629141	0.0125987
ENSMUSG00000057836	Xlr3a	1.55238	0.634484	0.0101527
ENSMUSG00000047676	Rpsa-ps10	1.55614	0.637969	0.0136094
ENSMUSG00000027776	Il12a	1.57222	0.652799	0.00040519
ENSMUSG00000081051	Gm15427	1.57312	0.653626	0.00822881
ENSMUSG00000021319	Sfrp4	1.57468	0.655061	0.000902056
ENSMUSG00000037010	Apln	1.58089	0.660737	3.15e-05
ENSMUSG00000057897	Camk2b	1.60862	0.685821	0.0133321
ENSMUSG00000073490	AI607873	1.61022	0.687258	0.0146544
ENSMUSG00000091387	Gcnt4	1.6285	0.703542	7.58e-05
ENSMUSG00000037362	Nov	1.63417	0.708561	3.16e-07
ENSMUSG00000020061	Mybpc1	1.64272	0.716088	0.00296121
ENSMUSG00000089701	Gm15978	1.66622	0.73658	0.0451547
ENSMUSG00000007877	Tcap	1.67298	0.742418	0.00349454
ENSMUSG00000044951	Mylk4	1.6732	0.742611	1.09e-17
ENSMUSG00000074892	B3galt5	1.69937	0.764996	0.0307961
ENSMUSG00000032666	1700025G04Rik	1.70141	0.766732	0.00225604
ENSMUSG00000052516	Robo2	1.71302	0.77654	3.45e-05
ENSMUSG00000044734	Serpinb1a	1.71592	0.778981	5.58e-42
ENSMUSG00000046157	Tmem229b	1.71787	0.78062	0.000151585
ENSMUSG00000047728	BC025446	1.71807	0.780793	0.0431785
ENSMUSG00000031712	Il15	1.72273	0.7847	0.0152887
ENSMUSG00000057606	Colq	1.72781	0.788945	0.0169905
ENSMUSG00000057003	Myh4	1.73192	0.792374	0.00153296
ENSMUSG00000087168	Gm15983	1.73788	0.797327	0.0459354
ENSMUSG00000028555	Ttc39a	1.73845	0.797805	0.0368076
ENSMUSG00000066632	Pgk1-rs7	1.7432	0.801735	0.0015222
ENSMUSG00000034533	Scn10a	1.7605	0.815989	9.12e-07
ENSMUSG00000079559	Gm684	1.76552	0.820092	0.00233838
ENSMUSG00000040752	Myh6	1.76948	0.823328	1.71e-07
ENSMUSG00000035095	Fam167a	1.77439	0.82732	0.00423864
ENSMUSG00000053886	Sh2d4a	1.79525	0.844188	0.005769
ENSMUSG00000002944	Cd36	1.80253	0.850022	0.0354541
ENSMUSG00000025746	Il6	1.80999	0.855982	0.0232987
ENSMUSG00000053093	Myh7	1.82871	0.870828	1.55e-12
ENSMUSG00000004655	Aqp1	1.82925	0.871253	2.4e-05
ENSMUSG00000075591	Gm10874	1.84195	0.881231	0.00352134
ENSMUSG00000051359	Ncald	1.8506	0.887993	0.0459367
ENSMUSG00000008658	Rbfox1	1.85494	0.891375	0.0411073
ENSMUSG00000039629	Strip2	1.88818	0.916995	0.0220174
ENSMUSG00000031450	Grk1	1.89748	0.924085	0.0126716
ENSMUSG00000025582	Nptx1	1.8976	0.924177	2.95e-18
ENSMUSG00000083111	Gm14421	1.90278	0.928111	0.00993614
ENSMUSG00000098404	Mrip-ps	1.94563	0.960238	0.0371013
ENSMUSG00000001657	Hoxc8	1.96825	0.976913	0.0107932
ENSMUSG00000027583	Zbtb46	1.98656	0.990273	0.0136497
ENSMUSG00000014602	Kif1a	2.01588	1.01141	0.0151282
ENSMUSG00000097071	4930544I03Rik	2.05039	1.0359	0.000509237
ENSMUSG00000097418	Mir155hg	2.05953	1.04231	0.0404155
ENSMUSG00000054057	A930004D18Rik	2.05966	1.04241	0.0186143
ENSMUSG00000053113	Socs3	2.07138	1.0506	2.86e-06
ENSMUSG00000021750	Fam107a	2.10369	1.07292	1.27e-10
ENSMUSG00000084215	Gm11814	2.12607	1.08819	0.00265705
ENSMUSG00000097667	Gm26764	2.1464	1.10192	0.0262522
ENSMUSG00000048368	Omd	2.15723	1.10918	0.00931282
ENSMUSG00000029757	Dync1i1	2.16938	1.11729	0.00226917
ENSMUSG00000075296	Aldh3b2	2.17972	1.12414	0.0241004
ENSMUSG00000086607	4930511M06Rik	2.23032	1.15725	0.0333589
ENSMUSG00000047757	Fancb	2.26407	1.17892	0.0233497
ENSMUSG00000037709	Fam13a	2.30126	1.20243	0.00919273
ENSMUSG00000016024	Lbp	2.34439	1.22921	0.000121632
ENSMUSG00000051984	Sec31b	2.3555	1.23603	0.0218906
ENSMUSG00000080848	Gm9385	2.70714	1.43677	3.54e-07
ENSMUSG00000083610	Oaz2-ps	2.76428	1.4669	0.0348048
ENSMUSG00000031654	Cbln1	2.92954	1.55067	0.000862623
ENSMUSG00000052143	Gm9869	2.95409	1.56271	0.000425352
ENSMUSG00000020340	Cyfip2	3.00212	1.58598	0.0333941
ENSMUSG00000043192	Gm1840	3.00504	1.58739	0.00915937
ENSMUSG00000083394	Gm11703	3.05726	1.61224	0.0493129
ENSMUSG00000041329	Atp1b2	3.1849	1.67125	0.0273652
ENSMUSG00000018830	Myh11	3.24528	1.69834	0.049137
ENSMUSG00000073198	Bnip3l-ps	3.30227	1.72346	0.00599027
ENSMUSG00000072571	Tmem253	3.31867	1.73061	0.03242
ENSMUSG00000050663	Trhde	3.3818	1.75779	0.0357553
ENSMUSG00000085939	Cd63-ps	3.39485	1.76335	0.0236218
ENSMUSG00000086681	Gm16178	3.78959	1.92204	0.0132308
ENSMUSG00000081210	Gm12933	4.51303	2.1741	0.0490562
ENSMUSG00000085611	Ap3s1-ps1	4.66788	2.22277	0.0396447
ENSMUSG00000028965	Tnfrsf9	4.6854	2.22817	0.0228808
ENSMUSG00000082361	Btc	4.7382	2.24434	0.0402451
ENSMUSG00000083382	Gm6433	4.86026	2.28103	0.0163379
ENSMUSG00000081170	Gm12922	5.283	2.40136	0.0374798
ENSMUSG00000003477	Inmt	5.94251	2.57107	0.000576788
ENSMUSG00000066362	Rps13-ps1	6.25692	2.64545	0.00322204
ENSMUSG00000085342	Gm12254	6.49102	2.69845	0.0200625
ENSMUSG00000071414	Gm6736	6.51749	2.70432	0.00438699
ENSMUSG00000098019	Gm2546	6.61334	2.72538	0.0302877
ENSMUSG00000080994	Gm13464	6.85967	2.77814	3.54e-06
ENSMUSG00000081281	Gm6274	8.48277	3.08454	0.0411767
ENSMUSG00000067121	Gm7027	8.97174	3.16539	0.0012802
ENSMUSG00000034981	Parm1	9.12758	3.19023	2.55e-05
ENSMUSG00000068615	Gjd2	9.67325	3.274	0.0250374
ENSMUSG00000027485	Bpifb1	9.73657	3.28341	0.0110143
ENSMUSG00000083914	Rps18-ps1	10.1028	3.33669	0.0478012
ENSMUSG00000098713	Rps2-ps5	11.4815	3.52124	0.0280037
ENSMUSG00000092985	Mir378b	15.5878	3.96234	0.0121996
ENSMUSG00000088442	Gm23553	15.6125	3.96463	0.0260177
ENSMUSG00000095940	Gm16416	20.9314	4.3876	0.00409781
ENSMUSG00000083326	Rpl38-ps1	21.9182	4.45406	0.0280264
ENSMUSG00000082988	Gm5903	Inf	Inf	0.0245006
ENSMUSG00000026180	Cxcr2	Inf	Inf	0.0247557
ENSMUSG00000083689	Gm14094	Inf	Inf	0.0399491

## Sheet: ST3_Top DEGs DMD and C2C12
Supplemental Table ST3_ 18 Differently expressed genes in common between C2C12 muscle cells treated with miR-155 and Duchenne muscular dystrophy.
miRNA mmu-miR-155-5p; Specie Mus musculus; Duchenne muscular dystrophy (II) (HG-U95A); Specie Homo sapiens
Cluster	Genes	Fold-change miR-155	p-value miR-155	Fold-change DMD	p-value DMD
Cluster 1	ARG2	0.63606	0.00501	2.30925	0.00663
Cluster 1	BTC	0.190649	0.0285	1.73977	0.0174
Cluster 1	AMHR2	0.483419	0.035	3.61946	0.000121
Cluster 1	TCAP	0.626579	0.00142	1.70846	0.00994
Cluster 1	NEK2	2.56031	0.00334	1.66697	0.0156
Cluster 1	ALDH1L1	2.29879	0.0045	3.78648	2.03e-07
Cluster 1	PLCE1	0.571566	0.0466	0.456847	0.000816
Cluster 2	NR1H3	0.418889	0.0304	0.65628	0.012
Cluster 2	CCL3	2.23032	0.0129	0.517534	0.0031
Cluster 2	BUB1B	0.253753	0.0278	0.487869	0.00252
Cluster 2	MYH6	1.58089	0.0147	0.608461	0.017
Cluster 2	DYNC1I1	0.642753	0.0259	0.451189	0.0257
Cluster 2	ATP9A	1.85953	0.0166	0.376693	0.000635
Cluster 2	RAMP3	0.208514	0.0418	0.655138	0.00261
Cluster 2	SLC16A4	0.563334	0.0261	0.31418	0.00687
Cluster 2	SFRP4	1.63417	0.00751	0.339119	0.000456
Cluster 2	TRPC1	1.70141	0.00989	0.46785	0.00599
Cluster 2	NDC80	6.61334	0.0343913	0.364671	0.00618211

## Sheet: ST4_Role of miR-155 targets
Supplemental Table ST5 Role of important genes directly and indirectly deregulated by miR-155.
GENE	Key role	Kegg Pathway	Jensen - COMPARTMENTS	Pubmed	PMID
ARG2	Metabolism	Glycolysis / Gluconeogenesis	Mitochondrial matrix Cytoplasm Mitochondrion	J Zhang et al, 2015	PMID: 26436399
		Biosynthesis of amino acids - Homo sapiens (human)
		Arginine biosynthesis - Homo sapiens (human)
BTC	Cell cycle	ErbB signaling pathway	Extracellular space Plasma membrane	L Ceafalan et al, 2015	PMID: 26436399
AMHR2	Immune sytem	Cytokine-cytokine receptor interaction	Membrane	-
		TGF-beta signaling pathway
TCAP	Muscle cells	-	Cytosol	Chad D Markert et al, 2008	PMID: 18440815
				Marvin Wirianto et al, 2020	PMID: 32937135
				Chad D Markert et al, 2010	PMID: 20233748
NEK2	Cell cycle	-	Nucleus Microtubule organizing center Cytoplasm	-
ALDH1L1	Muscle cells / Metabolism	One carbon pool by folate	Cytoplasm	Sneha Damal Villivalam et al, 2021	PMID: 33847380
PLCE1	Metabolism	Metabolic pathways	Cytosol	-
NR1H3	Metabolism	Insulin resistance	Nucleus	N P Hessvik ET AL, 2010	PMID: 19996385
		PPAR signaling pathway		Bo Zhang et al, 2016	PMID: 27229308
CCL3	Muscle cells / Immune system	Cytokine-cytokine receptor interaction	Extracellular region	M Civatte et al, 2005	PMID: 15634233
				C Zhang et al, 2019	PMID: 30321562
BUB1B	Immune sytem / Cell cycle	ErbB signaling pathway	Cytoplasm Microtubule organizing center Nucleus Condensed chromosome kinetochore	D. Baker et al, 2011	PMID: 22048312
		T cell receptor signaling pathway		Wijshake T et al, 2012	PMID: 23300461
		Cell cycle		Jun Okadome et al, 2018	PMID: 28974341
		Focal adhesion
MYH6	Muscle cells	Cardiac muscle contraction	Myofibril Cytosol	R. Chen et al, 2010	PMID: 29331478
		cGMP-PKG signaling pathway		Charles A Stuart et al, 2016	PMID: 26676053
				Jiayu Zhu et al, 2015	PMID: 26520103
DYNC1I1	Muscle cells / Metabolism	Phagosome	Cytosol	Yildiz Kelahmetoglu et al, 2020	PMID: 33193103
		Vasopressin-regulated water reabsorption
ATP9A	Metabolism	-	Trans-Golgi network Plasma membrane	Jordan T. Best et al, 2019	PMID: 30897446
RAMP3	Muscle cells	Vascular smooth muscle contraction	Plasma membrane Lysosome	-
SLC16A4	Muscle cells / Metabolism	-	Plasma membrane	Jenny Lund et al, 2016	DOI:10.1038/s41598-018-28249-5
SFRP4	Metabolism	Wnt signaling pathway	Extracellular space Nucleus	Tina Hörbelt et al, 2019	PMID: 31336149
TRPC1	Muscle cells / Metabolism	Pancreatic secretion	Membrane	Bao-Ting Zhang et al, 2014	PMID: 23852583
				Kwok-Kuen Cheung et al, 2011	PMID: 21996795
NDC80	Cell cycle	-	Nucleus	Lin Feng et al, 2017	PMID: 28326484
				Lucia Formigli et al, 2009	PMID: 19351713
				Philippe Gailly, 2012	PMID: 22349418

## Sheet: ST5_Normalized Count Table_MB
Supplementary Table 5. Normalized count table from myobasts. Negative Control (CTM), miR-155 mimic (MIM)
	CTM_MB1	CTM_MB2	CTM_MB3	MIM_MB1	MIM_MB2	MIM_MB3
ENSMUSG00000064351	146080	141168	149203	152769	140672	145379
ENSMUSG00000037742	124955	128878	127677	127707	127124	128642
ENSMUSG00000026728	99291.6	98280.7	97297.5	103589	102452	102061
ENSMUSG00000064354	59739.4	62805.8	62095.5	64858.9	60384.8	60719.6
ENSMUSG00000032294	60794.1	62649.8	60627.5	61675.7	61353	60626
ENSMUSG00000023944	55060.2	56253.6	54468.7	56812.6	55854.5	55577.5
ENSMUSG00000034994	53625.1	53819	52723.8	52759.7	55099.4	55022.2
ENSMUSG00000031328	52236.8	52230.1	52784.9	50868.2	54203	51631.5
ENSMUSG00000026193	47866.5	48725.9	50231.5	49503.1	52331.3	52711.1
ENSMUSG00000068220	46260.7	49117.3	47785.6	52716.1	47772.3	48360.6
ENSMUSG00000029580	47892.9	47851.9	46877.9	44883.9	48464.8	50331
ENSMUSG00000064370	46317.1	46622.1	48630.2	48913.3	46094.1	47124.7
ENSMUSG00000064358	47539	45968.9	47954.1	48866	46437.3	45882.3
ENSMUSG00000029304	44249	46359.3	43858.7	45043.2	46977.2	43987.4
ENSMUSG00000064357	44203.2	43449.6	45976.8	44346.3	44055.4	43291.3
ENSMUSG00000064341	39536.3	38899.7	41246	39643.8	38967.7	39804.2
ENSMUSG00000022443	36591.4	37799.6	36322.6	35636.9	38556.9	37049.6
ENSMUSG00000040249	37664.6	37332.8	37184.9	34582.9	38839.7	35363.7
ENSMUSG00000069833	35379.1	34770.6	34523.1	29696.1	36540.7	32953.5
ENSMUSG00000064363	33739	33474.8	34322.1	32757.3	33365.8	34450.4
ENSMUSG00000064367	31074.9	31937.2	32005.8	29790.7	31274.8	30649.7
ENSMUSG00000060126	30883	31219.2	29912.7	32324.3	31237.9	31173.2
ENSMUSG00000022565	31255.4	31080	30749.1	27009.5	33141.4	30775.1
ENSMUSG00000067274	30089.8	29850.1	30739.8	31924.8	30357.9	30194.4
ENSMUSG00000015656	30207.8	30776.4	30549.9	30573.4	29716.5	29863.6
ENSMUSG00000025393	28571.1	29403.2	29169.1	30592.1	28754.5	29615.5
ENSMUSG00000032518	28149.4	28350.3	28234.6	29716	28723.8	28533.1
ENSMUSG00000086503	29345.9	28268.6	29498.8	27031.9	28454.4	26508.2
ENSMUSG00000057666	27462.7	27606.1	28832.9	29485.8	28185.9	28049.6
ENSMUSG00000063524	27609.8	27761	27883.6	27907.9	28244.3	27760.6
ENSMUSG00000026234	26415.1	27399.9	26119.2	27486.1	27667.5	27251.7
ENSMUSG00000001525	25744.2	25400.7	25528.4	24839.3	25555	25914.8
ENSMUSG00000032399	24693	25260.5	25052.3	25695.4	25696.4	25958.4
ENSMUSG00000003814	24425.4	24802	24605	26847.7	25303	24944.2
ENSMUSG00000026043	24109.3	23889.3	23820.5	23759.1	25145.2	24996.9
ENSMUSG00000031375	23143.6	22406.2	23323.2	24342.8	24267.2	24485.2
ENSMUSG00000026238	22809.9	24524.7	23383.4	24640.2	23162.8	23570.1
ENSMUSG00000029661	22232.4	22542.2	22801.8	23059.8	23538.8	23370.1
ENSMUSG00000022283	23147.1	22839.5	22877.7	20673.1	22352.5	23319.2
ENSMUSG00000071866	21985	23204.8	21582	24316.6	21594.3	23102.9
ENSMUSG00000062825	22804.6	21975	22019.2	22153.9	22747.9	22972.1
ENSMUSG00000028063	22660.2	22514	21588.5	21972.2	23085	22843
ENSMUSG00000032231	21682.1	22716	21514.4	23872.4	22344.3	22710.3
ENSMUSG00000026185	21491.1	22203.1	22493.4	20389.3	23083.9	21872.4
ENSMUSG00000018593	20837	20346.3	20949.5	21898.8	21929.3	22649.4
ENSMUSG00000064345	20605.4	21048.6	21880.3	21108.6	21016.5	20658.2
ENSMUSG00000005610	21120.4	20595.4	21446.8	19270.6	20394.6	20749.1
ENSMUSG00000056201	20171.4	20531.6	19907.6	21791.8	19946.9	20698.2
ENSMUSG00000035783	19520.8	19036.9	19376.9	21635	21071.8	21881.5
ENSMUSG00000057113	19658.1	20626.8	19932.6	21995.8	20122.1	20056.6
ENSMUSG00000003970	19657.2	19832.4	19217.6	21020.2	19830.1	20544.6
ENSMUSG00000001020	19313.9	20577.6	19325.9	21474.4	19914.2	19726.7
ENSMUSG00000040152	19778.7	19299.6	19741.8	19890.3	20291.2	20667.3
ENSMUSG00000004980	19575.4	19935	19238	20827.4	19125.3	19600.4
ENSMUSG00000025130	19190.6	19075.7	19248.1	19650.2	19400.9	19773.9
ENSMUSG00000024661	18082.2	19093.5	17806.1	18960.8	18841.5	19728.5
ENSMUSG00000059796	18431.7	19271.4	18967.5	19224.6	18481.9	18198.1
ENSMUSG00000032216	19469.7	18825.5	19536.2	17427.7	18428.6	18176.3
ENSMUSG00000020372	18318.2	18086.6	18513.7	18784.1	18129.5	18764.3
ENSMUSG00000045983	18552.4	18687.3	18334	17718.9	18900.9	18137.2
ENSMUSG00000031207	18194	17898.1	17811.7	17728.8	18036.3	18111.7
ENSMUSG00000078812	18263.6	17817.6	17574.6	18495.4	17745.3	17829.1
ENSMUSG00000024359	17826	18159.8	17858.9	18418.2	17804.7	17568.3
ENSMUSG00000007892	17474.8	17865.7	17161.5	18680.8	17342.7	18005.4
ENSMUSG00000001440	18149.1	18375.4	17991.4	16938.6	17220.8	17201.1
ENSMUSG00000021270	16925.4	17218.9	16875.4	18509.1	17575.2	17817.3
ENSMUSG00000020719	17215.9	17167.6	16673.5	18662.1	17013.8	16975.7
ENSMUSG00000063229	16715.9	17109	16850.3	17483.7	16956.4	17121.1
ENSMUSG00000004891	16511.6	17125.7	16529	15674.3	17426.7	17401
ENSMUSG00000046434	16184.1	17135.1	16184.4	16829.1	16743.3	16629.5
ENSMUSG00000028763	16649.8	16232.9	16867.9	15314.7	17895.9	16307.7
ENSMUSG00000034220	16289.8	15693.9	16606.8	16337.6	16762.8	16653.1
ENSMUSG00000070436	15876.9	16238.1	15590.8	16931.2	16882.7	17040.2
ENSMUSG00000031320	16299.4	16360.6	16284.5	17165.1	16025.2	16108.7
ENSMUSG00000061983	15421.7	16338.6	16244.6	16322.7	16220.8	16337.7
ENSMUSG00000031004	15987.8	16140.8	16566.9	14253.2	16633.7	15887
ENSMUSG00000024740	15501.8	15972.3	15175.9	15292.3	15801.8	15868.8
ENSMUSG00000025428	15146.1	15767.1	15091.6	15792.6	16010.8	15730.6
ENSMUSG00000060036	15534.4	15240.6	15546.3	15301	15621.5	15595.2
ENSMUSG00000083840	15639.2	15787	15331.5	15678.1	14823.4	15399.8
ENSMUSG00000097554	15426.1	15552.5	15505.6	15272.4	15172.8	15446.2
ENSMUSG00000028465	15243	15410.2	15425	14478.5	16006.7	15475.3
ENSMUSG00000018293	15525.6	15057.5	15136	15124.3	15527.3	15318.9
ENSMUSG00000020914	15338.1	15674	15563	15362	15067.3	14745.5
ENSMUSG00000023004	15034.3	15915.7	15196.2	15665.6	14650.3	15112.6
ENSMUSG00000025132	15037	14876.4	15227.7	14773.4	15772.1	15289
ENSMUSG00000025203	14446.2	14610.5	14843.4	14890.4	16170.6	15564.3
ENSMUSG00000039630	14981.5	15738.9	14874.9	14605.4	14693.3	14688.2
ENSMUSG00000062647	14285.1	14630.4	14394.2	15811.2	14432.1	15179.9
ENSMUSG00000050708	14866.2	15070	14480.3	14769.7	14029.4	13927.6
ENSMUSG00000025278	14365.2	13997.2	14590.5	13585	14979.2	14743.7
ENSMUSG00000031799	14441.8	14131.2	14065.4	14701.2	14395.2	14542.8
ENSMUSG00000093674	14240.2	14123.8	13806.1	15220.1	14563.2	14265.6
ENSMUSG00000038900	13713.8	14545.6	14167.3	14873	13876.8	14583.7
ENSMUSG00000043716	13719	13832.9	13997.8	14849.3	14137	14326.5
ENSMUSG00000026042	14031.6	13406.9	13727.4	14324.2	13978.2	14478.3
ENSMUSG00000025980	13733.1	14099.8	13360.6	14758.5	13950.6	13854.8
ENSMUSG00000018707	13743.7	13784.7	14072.8	13347.3	14567.3	13819.4
ENSMUSG00000020048	13642.4	13567	13916.3	14244.5	14040.7	13998.4
ENSMUSG00000058355	13872.2	13777.4	13728.3	13317.5	13694.4	13929.4
ENSMUSG00000030208	13550	13517.8	13258.7	14166.1	13778.4	13759.4
ENSMUSG00000059005	14168	14631.5	13845	13259	12973.2	12767
ENSMUSG00000021546	13612.5	13351.4	13123.5	13868.7	13698.5	13659.5
ENSMUSG00000005397	14204.1	13444.5	13509.7	12985.2	13149.4	13045.1
ENSMUSG00000048126	12547.2	13088.7	13023.5	13369.7	14363.4	14076.6
ENSMUSG00000029614	12924.1	13358.7	13000.3	13660.9	13121.7	13554.9
ENSMUSG00000024393	13496.3	12985.1	12916.1	12110.4	13300	13297.7
ENSMUSG00000004207	12912.6	12784.1	12783.6	13787.8	12931.2	13116
ENSMUSG00000020849	12898.5	12830.1	12874.4	13102.2	13162.7	13036.9
ENSMUSG00000034088	12798.2	12762.1	13088.3	12145.3	13013.1	12548.9
ENSMUSG00000025351	12633.5	12978.8	12380.8	13369.7	12309.3	12594.3
ENSMUSG00000024991	12379.1	13358.7	12685.5	12045.7	12519.3	12375.3
ENSMUSG00000025809	12313.9	12347.6	12397.4	13064.9	12340.1	12699.7
ENSMUSG00000029430	12460.1	12625	12083.5	12716.4	12451.7	12436.2
ENSMUSG00000029767	12100	12343.4	12077.9	12966.5	12363.6	12736.1
ENSMUSG00000047675	12100.9	12101.7	12111.2	12857	12794.9	12219
ENSMUSG00000036550	12852.7	12407.3	12856.8	11331.4	12308.3	11837.3
ENSMUSG00000039218	12139.6	12700.4	12838.3	11764.5	12211	11823.7
ENSMUSG00000090625	12571	12174.9	12353	11683.6	12073.7	12187.2
ENSMUSG00000027523	12470.7	12272.3	12079.8	11571.6	11962	12243.5
ENSMUSG00000028649	11593.8	11958.3	12402.1	10722.9	12482.5	11297.4
ENSMUSG00000025261	11910.7	11620.2	12116.8	10807.5	12393.3	11336.5
ENSMUSG00000058655	11634.3	12034.7	11588	11781.9	11464.1	11405.6
ENSMUSG00000026864	11479.3	11734.3	11645.4	12009.6	11609.6	11421
ENSMUSG00000008682	11352.6	11129.3	11454.6	12277.2	11265.4	11856.4
ENSMUSG00000030695	11169.4	11266.4	11695.4	11444.7	11498.9	11442.9
ENSMUSG00000031659	11047.1	10937.8	11159.2	11510.6	11542	11688.2
ENSMUSG00000058558	10834.9	11635.9	11097.1	11832.9	11035.9	11539.2
ENSMUSG00000000787	11030.3	10808	11011.9	11453.4	11643.4	11773.7
ENSMUSG00000062070	11018	11641.1	11053.6	11268	11151.6	11346.5
ENSMUSG00000029860	11201.1	11130.3	11312.9	10770.2	11359.6	11494.7
ENSMUSG00000004044	11257.5	11396.2	11092.5	10868.5	11426.2	11194.8
ENSMUSG00000020368	11249.6	11389.9	11275.9	10705.5	11311.5	11132
ENSMUSG00000029761	11176.5	10948.2	10770.2	11143.5	11079.9	11057.5
ENSMUSG00000022285	11098.1	11122	10692.4	10776.4	10993.9	10983.9
ENSMUSG00000036371	10871.9	11012.1	10599.8	11834.2	10690.6	10885.8
ENSMUSG00000037815	10897.4	11115.7	10775.7	10867.3	11069.7	10930.3
ENSMUSG00000032366	10460.7	10799.6	10527.5	11426	11149.6	11205.7
ENSMUSG00000020850	10981.9	10712.7	11005.4	10564.9	10936.5	11053
ENSMUSG00000005417	10878.9	11222.5	11155.5	10189.1	10942.6	10717.6
ENSMUSG00000017466	11105.2	10517	11337.9	10396.9	10799.2	10700.4
ENSMUSG00000058546	10420.2	10840.4	10701.6	11370	10884.2	10933
ENSMUSG00000074934	10731	10751.4	10680.3	10639.5	11197.7	10849.4
ENSMUSG00000058799	10878.9	10786	10467.3	10714.2	10977.5	10862.1
ENSMUSG00000026131	10908	10935.7	10873.9	10242.6	11504.1	10107.8
ENSMUSG00000020358	10612.2	10867.6	10314.5	11286.6	10535.9	10985.7
ENSMUSG00000036990	10684.4	10553.6	10857.2	10211.5	10590.2	10258.7
ENSMUSG00000071415	10297.9	11381.5	9892.19	11127.3	10459.1	10227.8
ENSMUSG00000027184	10768	10285.7	10736.8	10044.7	10469.3	10603.1
ENSMUSG00000028639	10391.2	10712.7	10196	10601	10524.6	10547.7
ENSMUSG00000016559	10646.5	10501.3	10082.1	11095	10353.6	10329.6
ENSMUSG00000025290	10501.2	10591.3	10138.5	11233.1	10201.9	10238.7
ENSMUSG00000026837	9988.85	10140.2	9729.19	10487.7	11021.5	11167.5
ENSMUSG00000006932	10215.1	10580.8	10755.4	10098.2	10248	10098.7
ENSMUSG00000057841	10114.7	10621.7	9923.68	10765.2	10207.1	10420.4
ENSMUSG00000074129	10322.5	9860.73	9948.69	10978	10324.9	10304.1
ENSMUSG00000016319	10122.7	10318.1	10147.8	10574.8	10014.4	10292.3
ENSMUSG00000092341	9333.84	11274.8	10157.1	9535.76	9426.39	11444.7
ENSMUSG00000036777	10027.6	10193.6	10373.8	9823.22	10100.5	10005.1
ENSMUSG00000048612	9984.45	10140.2	9890.34	9901.61	10311.6	10026.9
ENSMUSG00000014599	10146.4	10082.6	10375.6	10154.2	9598.5	9877.88
ENSMUSG00000028364	9516.96	9480.79	9596.75	9744.82	10748	11087.5
ENSMUSG00000028452	10046.1	9968.54	9845.89	10153	10168.1	10015.1
ENSMUSG00000054808	10078.6	10188.3	9718.08	9895.39	10134.3	10088.7
ENSMUSG00000090841	9659.58	10297.2	9571.75	10731.6	9751.15	9986.03
ENSMUSG00000029718	9533.69	9823.05	9886.64	10102	10242.9	10058.7
ENSMUSG00000002602	9753.78	9918.3	9987.59	9886.68	10003.2	10000.6
ENSMUSG00000021939	9487.91	9649.3	10007	10451.6	9930.44	10002.4
ENSMUSG00000060600	9689.52	10020.9	9329.1	10350.8	9985.76	9875.16
ENSMUSG00000028495	9491.43	9874.34	9491.17	10466.6	9951.95	9851.53
ENSMUSG00000031447	9755.55	9459.85	10093.2	9906.59	9763.45	9832.44
ENSMUSG00000020612	9782.84	9777	9445.79	9682.6	10012.4	9901.51
ENSMUSG00000025794	9614.68	9630.46	9317.06	10212.7	9521.67	10071.5
ENSMUSG00000001924	9526.65	9467.18	9497.65	9649	10087.2	9869.71
ENSMUSG00000070348	10139.4	9820.96	9775.5	9270.71	9487.86	9431.66
ENSMUSG00000022265	9466.78	9380.31	9588.42	9606.69	9772.67	9975.13
ENSMUSG00000031715	9526.65	9715.24	9811.62	9439.95	9568.79	9583.43
ENSMUSG00000047126	9855.03	9629.41	9755.12	8677.13	9787.01	9553.44
ENSMUSG00000098178	8907.73	6423.45	11405.5	6178.4	6849.78	15917.9
ENSMUSG00000049517	9120.79	9291.34	9575.45	10111.9	9296.28	9468.92
ENSMUSG00000006998	9426.28	9423.22	9266.12	9675.14	9561.62	9395.3
ENSMUSG00000063457	9461.5	9215.98	9262.41	10124.4	9206.12	9467.1
ENSMUSG00000054766	9345.29	9427.41	9457.83	9089.03	9230.71	9422.57
ENSMUSG00000064080	9110.22	8984.66	9115.16	9530.79	9378.24	9798.82
ENSMUSG00000045962	9606.76	9358.32	9529.14	8241.6	9335.21	8891.82
ENSMUSG00000031696	9250.2	9240.05	9144.79	9382.7	8953.07	9216.27
ENSMUSG00000017774	9293.34	9276.68	9003.09	9049.21	9173.34	9308.06
ENSMUSG00000024608	8937.67	9574.99	8891.95	9752.29	8928.48	9209
ENSMUSG00000040463	9333.84	9176.2	8864.17	9103.96	9338.28	9136.29
ENSMUSG00000047215	8979.05	8771.14	9055.88	10189.1	8971.51	9129.93
ENSMUSG00000025153	8966.72	8875.81	9147.57	8874.99	9322.91	9139.93
ENSMUSG00000005198	8758.07	9095.61	9299.46	8603.72	9168.22	8896.37
ENSMUSG00000026796	8811.77	8967.91	8876.21	9179.87	9187.68	8906.36
ENSMUSG00000023456	8590.8	8922.91	9246.67	9223.42	8970.49	8943.62
ENSMUSG00000057738	8780.08	9084.1	8842.87	8736.87	9094.45	9119.03
ENSMUSG00000005481	8858.43	8607.86	8759.51	9273.2	8859.84	8872.74
ENSMUSG00000037805	8546.78	8668.57	8891.03	9178.62	8947.95	8916.36
ENSMUSG00000022234	8456.1	9110.26	8655.79	8914.81	8836.28	8872.74
ENSMUSG00000068039	8572.31	8706.25	8731.73	9157.47	8501.27	9116.3
ENSMUSG00000058600	8613.69	9016.06	8249.21	10033.5	8429.55	8636.45
ENSMUSG00000009575	9053.88	9051.65	9155.91	8209.24	8746.12	8249.29
ENSMUSG00000048076	8806.49	8747.07	8714.13	8786.64	8803.49	8598.28
ENSMUSG00000001910	8809.13	8696.83	8932.7	8040.01	8873.16	8695.52
ENSMUSG00000044533	8558.22	8474.93	8685.42	8673.4	8989.95	8819.12
ENSMUSG00000053931	8481.63	8729.27	8505.75	8759.26	8878.28	8790.04
ENSMUSG00000031672	8507.16	8523.08	8728.03	8838.91	8631.38	8720.06
ENSMUSG00000024640	8559.1	8564.94	8487.23	8604.96	9001.22	8664.62
ENSMUSG00000006333	8358.37	8735.55	8120.47	9528.3	8405.99	8232.02
ENSMUSG00000059291	8330.2	8472.84	8278.84	9428.75	8225.68	8386.52
ENSMUSG00000020361	8374.22	8519.94	8653.01	8383.46	8603.72	8277.47
ENSMUSG00000031633	8410.32	8159.88	8105.65	9014.36	8378.33	8607.36
ENSMUSG00000001175	8486.91	8824.52	8498.34	7888.19	8295.34	8412.88
ENSMUSG00000022314	8579.35	8369.22	8377.94	8016.36	8496.15	8462.86
ENSMUSG00000040225	8422.64	8378.64	8510.38	7713.98	8850.62	8289.28
ENSMUSG00000034024	8256.25	8617.28	8181.6	8441.94	8425.46	8358.35
ENSMUSG00000006498	8434.09	8474.93	8308.48	8117.16	8343.5	8453.77
ENSMUSG00000061315	8080.17	8077.19	8310.33	8868.77	8288.17	8573.74
ENSMUSG00000015143	8352.21	8265.6	8068.61	8259.02	8563.76	8447.41
ENSMUSG00000018042	8117.15	8394.34	8267.73	8561.41	8266.66	8352.9
ENSMUSG00000020315	8339.89	8475.98	8463.15	7949.17	8312.76	8233.84
ENSMUSG00000000740	8151.48	8216.4	8209.38	8468.08	8251.29	8316.54
ENSMUSG00000027248	8175.25	8233.15	7925.98	8779.17	8215.43	8293.82
ENSMUSG00000030744	8206.07	8303.28	7984.33	8892.41	8026.93	8178.4
ENSMUSG00000024048	8180.54	8286.53	7837.07	8660.96	8114.01	8250.2
ENSMUSG00000022462	8560.86	8539.82	8574.28	7692.82	7809.73	7740.36
ENSMUSG00000005161	8194.62	8053.12	7984.33	8810.28	7969.55	8154.78
ENSMUSG00000091747	8198.14	8210.12	8158.44	8331.19	8163.18	8018.45
ENSMUSG00000061904	8052.88	8080.33	8077.87	8313.77	8328.13	8155.68
ENSMUSG00000064368	8229.84	8336.77	8475.19	7889.44	8204.16	7519.52
ENSMUSG00000044217	7833.67	8046.84	8091.76	8222.93	8173.43	8325.63
ENSMUSG00000062328	8118.91	7935.89	7987.11	8332.44	7957.26	8233.84
ENSMUSG00000031691	8124.19	8123.25	7790.76	8135.82	8274.85	8081.16
ENSMUSG00000031167	7904.1	8384.92	7776.87	8256.53	8194.94	8005.73
ENSMUSG00000024587	7880.33	8199.66	7923.2	8327.46	8116.06	8060.26
ENSMUSG00000063870	8128.59	8198.61	7946.36	7731.4	8158.06	8132.96
ENSMUSG00000020649	8469.3	8143.13	8120.47	7705.27	7917.31	7887.58
ENSMUSG00000030662	8082.81	7958.92	7979.7	7605.71	7966.48	8067.53
ENSMUSG00000069117	7427.81	8555.52	7863.93	7972.81	7615.08	8228.39
ENSMUSG00000020460	7792.29	7964.15	7778.72	8842.64	7620.2	7784.89
ENSMUSG00000033161	7713.05	7964.15	7940.8	7939.21	8064.83	7936.66
ENSMUSG00000071644	7650.55	7829.13	7896.34	7985.25	8007.46	8062.99
ENSMUSG00000019437	7758.83	7533.97	7824.1	8166.93	8124.25	7974.83
ENSMUSG00000097346	7536.98	8139.99	7864.85	8119.65	7738.02	7993.01
ENSMUSG00000001416	7683.12	7999.74	7750.94	8254.04	7796.42	7777.62
ENSMUSG00000029581	7573.07	7452.33	7550.89	7804.82	8316.86	8383.8
ENSMUSG00000026547	7823.1	7567.46	7519.4	7944.19	8002.34	8190.22
ENSMUSG00000031701	7780.84	8067.77	7993.59	7864.55	7694.99	7577.68
ENSMUSG00000027067	7566.91	8011.25	7750.94	8150.76	7713.43	7840.33
ENSMUSG00000052146	7765	7495.24	7669.44	8035.03	7691.92	8153.87
ENSMUSG00000021614	7734.18	7564.32	7881.53	7452.65	7878.37	7774.89
ENSMUSG00000032332	7567.79	7551.76	7815.77	7307.06	8177.53	7828.51
ENSMUSG00000021823	7762.35	7585.26	7470.32	7256.04	8036.15	8008.46
ENSMUSG00000072235	7208.59	7321.49	8011.19	7888.19	8126.3	7713.09
ENSMUSG00000018340	7374.1	7968.34	7636.1	7560.92	7853.79	7795.79
ENSMUSG00000059070	7669.03	7818.67	7376.77	7670.42	7708.31	7764.9
ENSMUSG00000040385	7609.17	7715.04	7583.31	7639.31	7666.3	7748.54
ENSMUSG00000017404	7520.25	7712.95	7504.58	7934.23	7537.22	7681.28
ENSMUSG00000060147	7434.85	7572.7	7829.66	7893.17	7574.1	7555.87
ENSMUSG00000007850	7693.68	7402.09	7480.5	8084.8	7597.66	7552.23
ENSMUSG00000022961	7746.51	7626.08	7568.49	7595.76	7491.12	7609.49
ENSMUSG00000030007	7570.43	7503.62	7624.06	7706.51	7372.27	7803.97
ENSMUSG00000026208	7442.77	7426.16	7464.76	7567.14	7728.8	7794.89
ENSMUSG00000046364	7523.77	7412.56	7645.36	7796.11	7669.38	7376.83
ENSMUSG00000031311	7571.31	7748.54	7665.73	7597	7322.07	7298.67
ENSMUSG00000045128	7560.75	7425.12	7391.59	7950.41	7408.13	7460.44
ENSMUSG00000020473	7637.34	7413.6	7457.35	7463.85	7415.3	7613.12
ENSMUSG00000026615	7436.61	7653.29	7204.51	7471.32	7703.19	7575.86
ENSMUSG00000073702	7175.14	7506.76	7437.9	8419.55	7269.82	7339.57
ENSMUSG00000038014	7628.54	7493.15	7460.13	7002.19	7507.51	7614.03
ENSMUSG00000023036	7392.59	7282.77	7491.62	7217.46	7825.1	7516.79
ENSMUSG00000031765	7393.47	7264.97	7280.45	7966.59	7493.16	7407.73
ENSMUSG00000004897	7394.35	7756.91	7165.61	7531.05	7285.19	7540.42
ENSMUSG00000005103	7255.25	6936.32	7025.76	7802.33	7850.71	7731.27
ENSMUSG00000042699	7487.67	7462.8	7366.59	7338.17	7367.15	7393.19
ENSMUSG00000001911	7603.88	7459.66	7656.47	6535.54	7537.22	7422.27
ENSMUSG00000000031	7321.28	7593.63	7548.11	7168.93	7417.35	7318.67
ENSMUSG00000012848	7316.88	7064.01	7366.59	7949.17	7262.65	7305.94
ENSMUSG00000036438	7322.16	7717.14	7164.69	7385.46	7282.12	7283.22
ENSMUSG00000066036	7459.5	7544.44	7447.16	6813.04	7521.85	7107.82
ENSMUSG00000035150	7022.83	7030.52	7102.63	7657.98	7403.01	7584.95
ENSMUSG00000030536	7176.9	7066.11	7081.33	7293.37	7633.52	7446.81
ENSMUSG00000036606	7109.11	7230.43	7203.58	6976.05	7668.35	7448.63
ENSMUSG00000021910	7394.35	7016.91	7410.12	7030.81	7367.15	7270.5
ENSMUSG00000048578	7261.42	7190.66	7214.7	7303.33	7240.11	7335.03
ENSMUSG00000061477	6913.66	7319.4	7158.2	7928.01	7012.68	7235.97
ENSMUSG00000032562	7216.52	7066.11	7189.69	7198.8	7255.48	7221.43
ENSMUSG00000029467	7264.06	7168.68	7244.33	6865.3	7302.61	7185.98
ENSMUSG00000018379	7255.25	7105.88	7263.78	7303.33	7079.27	7063.29
ENSMUSG00000025613	7086.22	7021.1	7110.04	7303.33	7161.23	7224.15
ENSMUSG00000000753	6810.66	6819.09	7050.77	7256.04	7379.45	7535.87
ENSMUSG00000056076	7085.34	7262.88	7097.08	6683.62	7248.31	7255.05
ENSMUSG00000053398	7023.71	7138.33	6985.94	7206.27	7137.66	7222.33
ENSMUSG00000027940	7023.71	7250.32	6902.59	7198.8	7042.39	7116
ENSMUSG00000020075	7406.68	7032.61	7051.7	6764.51	6994.23	7081.47
ENSMUSG00000023015	7147.85	7149.84	6863.69	7119.16	7287.24	6864.26
ENSMUSG00000042079	7089.74	7213.69	6885.92	7284.66	7082.34	6875.17
ENSMUSG00000030057	6822.98	6991.79	6918.33	7384.21	7074.15	7088.74
ENSMUSG00000037563	7059.81	6917.48	6853.5	7587.05	6876.42	6988.77
ENSMUSG00000007029	7062.45	7002.26	6907.22	6771.97	7159.18	7109.64
ENSMUSG00000083773	7236.76	7000.17	6839.61	7173.91	6963.5	6860.63
ENSMUSG00000028333	7000.82	6944.69	6720.13	7253.55	7204.26	6896.07
ENSMUSG00000028691	6896.94	6860.96	6935.93	7499.94	6650	6867.9
ENSMUSG00000040731	6867	7004.35	6800.71	6876.5	6907.15	7015.12
ENSMUSG00000042406	6803.61	6801.3	6799.78	7254.8	6958.38	6924.24
ENSMUSG00000025967	6681.24	7250.32	6647.9	7425.28	6530.14	7016.94
ENSMUSG00000036427	6563.27	7025.29	6789.6	7039.52	7052.63	6966.05
ENSMUSG00000025508	6963.84	7204.27	6607.14	6832.95	7095.66	6686.13
ENSMUSG00000037242	6972.65	6626.5	6763.66	6804.33	7024.97	7062.38
ENSMUSG00000050335	6726.14	6614.99	6872.02	7264.75	6714.55	6887.89
ENSMUSG00000091957	7141.68	7429.3	6476.56	7438.97	6306.8	6373.5
ENSMUSG00000031751	6661.87	6820.14	6861.84	6661.22	6912.27	6998.77
ENSMUSG00000027828	6831.79	6896.54	6646.04	6743.35	6904.08	6784.29
ENSMUSG00000019179	6675.96	6647.44	6536.76	7054.45	6894.86	7014.22
ENSMUSG00000035530	6761.36	6821.18	6823.86	6703.53	6737.09	6793.37
ENSMUSG00000056851	6904.86	6726.98	6746.99	6477.05	6799.58	6898.8
ENSMUSG00000028234	6739.35	6630.69	6604.37	7073.12	6680.74	6851.54
ENSMUSG00000005683	6560.63	6776.18	6466.37	6941.21	6652.05	7134.18
ENSMUSG00000037894	6587.92	7097.51	6571.95	7088.05	6472.77	6607.98
ENSMUSG00000068699	6533.34	6754.2	6790.52	6158.49	6990.14	6914.25
ENSMUSG00000034593	6713.82	6624.41	6730.32	6495.72	6956.33	6540.72
ENSMUSG00000030738	6597.6	6805.48	6806.27	6595.27	6617.22	6598.89
ENSMUSG00000059208	6606.41	6786.64	6565.47	6723.44	6594.68	6693.4
ENSMUSG00000037487	6954.16	6675.7	6707.17	6243.11	6700.2	6509.82
ENSMUSG00000022477	6508.69	6662.09	6731.25	6770.73	6639.76	6557.08
ENSMUSG00000025364	6499.88	6928.99	6696.05	6628.87	6576.24	6498.92
ENSMUSG00000029064	6664.51	6791.88	6468.22	6314.04	6679.71	6781.56
ENSMUSG00000030122	6353.74	6585.68	6562.69	6464.61	7004.48	6747.93
ENSMUSG00000032479	6479.63	6874.56	6508.97	6292.88	6785.24	6724.3
ENSMUSG00000005087	6674.2	6300.99	6533.05	6510.65	6647.95	6917.88
ENSMUSG00000010277	6743.75	6731.17	6809.97	6020.36	6640.78	6378.05
ENSMUSG00000055322	6631.06	6554.28	6386.72	6309.06	6849.78	6660.69
ENSMUSG00000003429	6262.18	6599.29	6576.58	6883.97	6572.14	6559.81
ENSMUSG00000055053	6702.37	6333.43	6671.98	5917.08	6924.57	6602.52
ENSMUSG00000036752	6494.6	6591.96	6481.19	6409.86	6479.94	6788.83
ENSMUSG00000018583	6655.71	6265.4	6395.06	6443.45	6729.91	6595.25
ENSMUSG00000006005	6613.45	6757.34	6483.97	6132.36	6593.66	6461.66
ENSMUSG00000022186	6520.13	6473.69	6488.6	6520.61	6430.76	6436.21
ENSMUSG00000029447	6322.04	6692.44	6405.24	6401.14	6426.66	6620.7
ENSMUSG00000029777	6378.39	6377.39	6312.63	6570.38	6547.55	6684.32
ENSMUSG00000019505	6667.16	6765.71	6497.86	6483.27	5841.68	6425.31
ENSMUSG00000062353	6155.65	6340.76	6450.63	7068.14	6289.38	6509.82
ENSMUSG00000026074	6483.15	6532.3	6345.04	6514.38	6266.84	6477.11
ENSMUSG00000019961	6516.61	6555.33	6491.38	6328.97	6404.12	6286.26
ENSMUSG00000034349	6527.17	6383.67	6438.59	6567.89	6489.16	6199.92
ENSMUSG00000040945	6393.36	6268.54	6391.35	6413.59	6371.34	6676.14
ENSMUSG00000030795	6334.37	6908.06	6376.53	6621.4	6062.97	6263.54
ENSMUSG00000071172	6217.28	6504.04	6100.54	6560.43	6284.26	6708.85
ENSMUSG00000007739	6222.56	6648.48	6264.47	6429.77	6158.25	6574.35
ENSMUSG00000039262	6565.91	6502.99	6294.11	5801.35	6370.32	6516.19
ENSMUSG00000038991	6178.54	6119.91	6377.46	6467.1	6174.64	6614.34
ENSMUSG00000034377	6505.16	6505.09	6529.35	5823.75	6204.35	6170.84
ENSMUSG00000031960	6212	6486.25	6097.76	6123.65	6397.98	6420.76
ENSMUSG00000021660	6233.13	6484.15	5984.77	6729.66	6078.34	6264.45
ENSMUSG00000027642	6017.43	6046.64	6257.99	6581.58	6494.28	6338.06
ENSMUSG00000007891	6038.56	6328.2	6208.9	6472.07	6194.1	6411.67
ENSMUSG00000022841	6139.8	6360.65	6332.08	6136.09	6157.22	6420.76
ENSMUSG00000015837	6278.03	6537.53	6450.63	6325.24	6012.77	5973.63
ENSMUSG00000001025	5814.06	6307.27	5878.27	7572.12	6117.27	6157.21
ENSMUSG00000040549	6438.26	6280.05	6345.97	5974.32	6222.79	6141.76
ENSMUSG00000061787	6233.13	6181.66	5956.06	6922.54	6091.65	6243.54
ENSMUSG00000029622	6158.29	6498.81	5854.19	6718.46	6224.84	6069.05
ENSMUSG00000051391	5974.29	6267.49	6271.88	6010.41	6328.31	6420.76
ENSMUSG00000020290	6206.71	6104.21	6236.69	6058.94	6360.07	6270.81
ENSMUSG00000014355	6234.01	6161.78	6539.54	5945.7	6042.48	6252.63
ENSMUSG00000027907	6047.36	6196.32	6095.91	6520.61	6253.52	6220.82
ENSMUSG00000022391	6240.17	6262.26	6212.61	6210.75	6122.39	6143.57
ENSMUSG00000030357	6060.57	6383.67	6144.07	6183.38	6036.33	6375.32
ENSMUSG00000002900	6082.58	6100.02	6113.51	6309.06	6317.04	6252.63
ENSMUSG00000051223	6170.62	6171.2	6135.73	6263.02	5967.69	6298.98
ENSMUSG00000023942	6115.15	6139.8	5950.51	6192.09	6359.05	6238.09
ENSMUSG00000070047	6391.59	5976.52	6146.85	5917.08	6261.72	6182.65
ENSMUSG00000031422	6087.86	6201.55	6011.63	6228.17	6123.41	6229.91
ENSMUSG00000066551	6141.57	6070.72	6332.08	6360.08	5807.87	6019.97
ENSMUSG00000025982	6061.45	6049.78	6184.82	6101.25	6047.6	6160.84
ENSMUSG00000020869	6112.51	6098.98	6136.66	6118.67	6075.26	6022.7
ENSMUSG00000028656	6101.07	6027.8	6166.3	6061.43	6205.37	5992.71
ENSMUSG00000024529	6201.43	5965	6100.54	5496.47	6129.56	6487.1
ENSMUSG00000055065	6293.87	5945.12	6062.57	6152.27	6165.42	5820.04
ENSMUSG00000009079	5921.47	6330.29	6178.34	6250.57	5990.23	5839.12
ENSMUSG00000064356	6283.31	6391	6030.15	6022.85	5950.27	5669.17
ENSMUSG00000037331	6036.8	5952.44	6148.7	5773.97	6122.39	6186.29
ENSMUSG00000009470	6256.02	6049.78	6261.69	5766.51	5962.57	5885.47
ENSMUSG00000026509	5866	5902.2	5882.9	6144.8	6227.91	6264.45
ENSMUSG00000028820	6045.6	6026.76	6352.45	5854.86	5739.23	6049.06
ENSMUSG00000021427	6042.08	6034.08	5931.06	6141.07	6026.09	5967.26
ENSMUSG00000020422	5998.94	5799.63	5963.47	5929.52	6032.23	6241.73
ENSMUSG00000024073	6075.54	5719.03	6263.54	5629.62	6214.59	5974.53
ENSMUSG00000041841	6043.84	5850.92	6007	6396.17	6003.55	5650.09
ENSMUSG00000013629	5895.94	5603.9	6041.27	5917.08	5936.95	6363.51
ENSMUSG00000022403	5826.39	5873.94	6013.48	5905.88	5987.15	6161.75
ENSMUSG00000008668	5734.83	6276.91	5823.62	6108.71	5727.96	5944.54
ENSMUSG00000021218	6027.12	5917.9	5973.66	5744.11	5933.88	5882.74
ENSMUSG00000022816	6016.55	5678.21	5726.38	6301.59	5948.22	5920.91
ENSMUSG00000041453	5948.76	5977.56	5853.26	6427.28	5609.12	5815.49
ENSMUSG00000025348	5866	5937.79	5869.93	5992.98	5975.89	5903.65
ENSMUSG00000025151	5673.2	5853.01	5972.73	5956.9	6020.96	6009.07
ENSMUSG00000034120	5888.01	5851.96	6000.52	5940.72	5917.49	5859.11
ENSMUSG00000007041	5679.36	6088.51	5831.96	6291.64	5754.59	5915.46
ENSMUSG00000023175	5880.09	5889.64	5954.21	5986.76	5835.53	5907.28
ENSMUSG00000030082	5843.11	5811.14	6047.75	5481.54	6041.45	5915.46
ENSMUSG00000040952	5794.69	5909.53	5833.81	6496.96	5667.51	5665.54
ENSMUSG00000024659	5678.48	5705.43	5714.34	6373.77	5963.59	5875.47
ENSMUSG00000045817	5962.85	5946.16	6078.31	5359.59	5854.99	5847.3
ENSMUSG00000015647	5903.86	5854.06	5892.16	5803.84	6018.91	5696.44
ENSMUSG00000052727	5877.45	5982.8	5909.75	5252.57	6198.2	5740.97
ENSMUSG00000031010	6403.92	5722.17	6134.81	5185.38	5773.04	5610.1
ENSMUSG00000026605	5810.54	6015.24	6145	5180.4	5849.87	5886.38
ENSMUSG00000028367	5712.82	5999.54	5559.67	6287.9	5971.79	5596.47
ENSMUSG00000049775	5575.48	5716.94	5535.59	6444.7	5633.7	6138.12
ENSMUSG00000057236	5807.9	6035.13	5541.15	5879.74	5763.81	5834.58
ENSMUSG00000063316	5653.83	6085.37	5629.13	5711.75	5504.62	6024.52
ENSMUSG00000018770	5731.31	5686.59	5655.06	6123.65	5596.82	5839.12
ENSMUSG00000055302	5792.05	5772.41	5596.72	5899.66	5917.49	5621.91
ENSMUSG00000005566	5785.89	5525.4	5817.14	5655.75	5928.76	5753.69
ENSMUSG00000031762	5586.92	5620.65	5663.4	6389.95	5590.68	5780.96
ENSMUSG00000030096	5711.06	5498.19	5624.5	5708.02	6047.6	5852.75
ENSMUSG00000018362	5721.62	5651	5722.67	5944.45	5789.43	5536.49
ENSMUSG00000040681	5788.53	5682.4	5679.14	5827.48	5695.17	5585.56
ENSMUSG00000037851	5667.92	5726.36	5577.27	5686.86	5949.25	5647.36
ENSMUSG00000007815	5563.15	5474.11	5779.17	5700.55	5843.73	5779.14
ENSMUSG00000009927	5562.27	5975.47	5507.81	6005.43	5485.15	5631
ENSMUSG00000024966	5549.95	5577.73	5761.57	5756.55	5640.88	5707.34
ENSMUSG00000094483	5884.49	5742.06	5797.69	5272.48	5490.27	5611.92
ENSMUSG00000003847	5799.98	5430.15	5700.45	5296.13	5873.44	5676.44
ENSMUSG00000003948	5858.96	5416.55	5633.76	5491.5	5647.02	5725.52
ENSMUSG00000002748	5708.42	5863.48	5752.31	5257.55	5703.37	5468.33
ENSMUSG00000038274	5571.96	5541.1	5392.96	5844.9	5710.54	5754.6
ENSMUSG00000020402	5456.63	5380.96	5447.61	5824.99	5767.91	5833.67
ENSMUSG00000038615	5665.28	5728.45	5517.07	5383.23	5717.71	5575.57
ENSMUSG00000004105	5395	5532.73	5491.14	5790.15	5747.42	5678.26
ENSMUSG00000018474	5644.15	5636.35	5631.91	5486.52	5602.97	5493.77
ENSMUSG00000022241	5590.44	5713.8	5427.23	5713	5398.07	5698.26
ENSMUSG00000006728	5542.02	5602.85	5618.94	5604.73	5539.45	5588.29
ENSMUSG00000064339	5920.59	6222.49	6962.79	3875.03	4864.31	5184.78
ENSMUSG00000001506	5612.45	5320.25	5457.79	5090.8	5967.69	5888.2
ENSMUSG00000041459	5558.75	5596.57	5154.94	6127.38	5682.88	5443.79
ENSMUSG00000001729	5406.44	5706.47	5475.39	5424.3	5585.55	5617.37
ENSMUSG00000006356	5459.27	5479.35	5368.88	5500.21	5414.46	5860.02
ENSMUSG00000028692	5311.36	5534.82	5315.17	5755.31	5455.44	5665.54
ENSMUSG00000027800	5574.6	5385.14	5211.44	6047.74	5399.09	5409.25
ENSMUSG00000068566	5263.82	5333.86	5405	5426.79	5586.58	5737.33
ENSMUSG00000028059	5414.37	5384.1	5430.94	5373.28	5580.43	5463.78
ENSMUSG00000035242	5273.51	5473.07	5260.52	5608.47	5595.8	5483.78
ENSMUSG00000034993	5460.15	5386.19	5345.73	5253.82	5568.14	5525.58
ENSMUSG00000059248	5348.34	5302.46	5497.62	5141.82	5610.14	5588.29
ENSMUSG00000031386	5461.03	5385.14	5484.65	5106.98	5511.79	5491.95
ENSMUSG00000028081	5324.57	5611.23	5141.98	5888.46	5458.52	5145.7
ENSMUSG00000059040	5305.2	5865.57	5032.69	5162.98	5570.19	5437.43
ENSMUSG00000058013	5507.69	5532.73	5480.95	5032.32	5484.13	5172.96
ENSMUSG00000027763	5552.59	5283.62	5326.28	4990.01	5527.16	5465.6
ENSMUSG00000029840	5590.44	5397.71	5359.62	5177.91	5231.08	5381.08
ENSMUSG00000033565	5461.91	5382	5402.23	5097.02	5342.75	5384.71
ENSMUSG00000027405	5076.3	5524.35	5411.49	5558.69	5327.38	5296.56
ENSMUSG00000024360	5363.31	5276.29	5286.46	5403.14	5250.54	5456.51
ENSMUSG00000027422	5376.51	5782.88	5272.56	5185.38	5149.12	5250.21
ENSMUSG00000026553	5287.59	5228.14	5127.16	5292.39	5606.04	5428.34
ENSMUSG00000015165	5527.06	5428.06	5155.87	5102	5376.56	5283.84
ENSMUSG00000026434	5400.28	5329.67	5356.84	4970.1	5222.88	5502.86
ENSMUSG00000011179	5298.16	5183.14	5169.76	5368.3	5308.94	5521.04
ENSMUSG00000020152	5405.56	5375.72	5125.31	5154.27	5355.04	5357.45
ENSMUSG00000047250	5308.72	5262.68	5179.02	5299.86	5391.92	5352.91
ENSMUSG00000020250	5601.89	5309.78	5367.03	5318.52	5003.64	5083.9
ENSMUSG00000014867	5285.83	5120.34	5300.35	5113.2	5339.67	5426.52
ENSMUSG00000032187	5077.18	5137.08	5110.49	5247.59	5427.78	5402.89
ENSMUSG00000026276	5264.7	5094.17	5294.79	5080.85	5242.35	5335.64
ENSMUSG00000048154	5409.09	5367.35	5353.14	4563.18	5443.15	5044.82
ENSMUSG00000041734	5236.53	5129.76	5141.05	5324.75	5186	5263.84
ENSMUSG00000008683	5077.18	5241.75	5104.93	5622.16	5058.96	5249.3
ENSMUSG00000036698	5365.95	5263.73	5317.02	4774.73	5389.87	5031.19
ENSMUSG00000040998	5041.96	5093.12	5033.62	5640.82	5119.41	5399.26
ENSMUSG00000029169	5261.18	5117.2	5094.74	5377.01	5180.88	5222.95
ENSMUSG00000031353	5074.54	5186.28	5060.48	5272.48	5308.94	5298.38
ENSMUSG00000027715	5370.35	5072.19	5366.11	4890.45	5181.9	5175.69
ENSMUSG00000020821	5354.5	5248.03	5128.09	4938.99	5268.98	5149.33
ENSMUSG00000031078	5055.17	5109.87	5130.86	5325.99	5364.26	5189.32
ENSMUSG00000020580	5299.92	5062.77	5271.64	4942.72	5204.44	5247.48
ENSMUSG00000022884	5047.25	5146.5	5197.55	5449.19	5125.55	5196.59
ENSMUSG00000068823	5231.25	5229.19	5356.84	4814.55	4972.9	5291.11
ENSMUSG00000030978	5103.59	4956.01	5300.35	5135.6	5213.66	5191.14
ENSMUSG00000046330	5014.67	4941.35	5134.57	5913.34	5012.86	5058.45
ENSMUSG00000023150	5277.03	5046.02	5160.5	5089.56	5073.3	5162.96
ENSMUSG00000016554	4992.66	5221.86	5030.84	5289.9	5252.59	5106.62
ENSMUSG00000062997	5153.77	4928.79	4918.78	5545	5128.63	5206.59
ENSMUSG00000030084	5189.87	4917.28	5221.63	5102	5302.79	4994.83
ENSMUSG00000021282	5158.18	5148.6	5112.34	5175.42	4924.75	5192.96
ENSMUSG00000022360	5243.57	5153.83	5342.03	4895.43	4993.39	5000.29
ENSMUSG00000024335	5083.34	5121.38	5118.82	5192.84	5055.89	5139.34
ENSMUSG00000057193	5129.12	5005.2	5189.21	5032.32	5172.68	5084.81
ENSMUSG00000022892	5020.84	5102.54	5038.25	5146.8	5179.85	5161.15
ENSMUSG00000021996	5269.98	5301.41	5235.52	5316.04	4732.15	4806.71
ENSMUSG00000016487	5138.81	5140.22	4971.57	5240.13	5067.16	5046.64
ENSMUSG00000021242	5072.78	5062.77	4866.91	5383.23	5051.79	5184.78
ENSMUSG00000024853	5141.45	5130.8	4889.14	5176.66	5098.92	5089.35
ENSMUSG00000039001	5144.97	4975.89	4911.37	5583.58	5008.76	4946.67
ENSMUSG00000026341	5007.63	5150.69	4951.19	5090.8	4975.98	5257.48
ENSMUSG00000030432	5071.02	5176.86	4928.04	5200.31	4950.36	5039.37
ENSMUSG00000025403	5054.29	5145.46	5166.98	4950.19	4915.53	5046.64
ENSMUSG00000042520	5161.7	4903.67	5010.46	5140.58	5040.52	5022.1
ENSMUSG00000004099	5128.24	5127.66	5213.29	4795.88	4926.8	5009.38
ENSMUSG00000053907	5096.55	4803.19	4918.78	5335.95	5107.11	5007.56
ENSMUSG00000027107	4993.54	4861.81	4915.07	5158	5109.16	5122.07
ENSMUSG00000020458	5072.78	5076.38	4888.21	5115.69	4946.27	5006.65
ENSMUSG00000023010	5049.01	4944.49	4809.49	5027.34	5022.08	5172.96
ENSMUSG00000022533	5153.77	5103.59	5280.9	4564.42	4969.83	4840.34
ENSMUSG00000015749	5141.45	5044.98	5016.95	4992.49	4888.9	4821.25
ENSMUSG00000074364	4909.91	4611.65	4805.79	5161.73	5149.12	5217.49
ENSMUSG00000060636	4767.28	5340.14	4820.6	5424.3	4710.63	4879.41
ENSMUSG00000079641	4622.9	5173.72	4785.41	5469.1	5128.63	4736.73
ENSMUSG00000026219	5199.55	4917.28	4930.82	4651.53	4985.2	4940.31
ENSMUSG00000024940	4798.98	4997.88	5226.26	4668.95	5007.74	4947.58
ENSMUSG00000024576	4989.14	4918.33	4989.16	5059.69	4873.53	4836.7
ENSMUSG00000027288	5027.88	4951.82	4937.3	4712.51	5054.86	4903.04
ENSMUSG00000026478	4842.12	4959.15	4988.24	4708.77	5113.26	4977.57
ENSMUSG00000027712	4701.26	5035.56	4800.23	5103.25	5078.43	4977.57
ENSMUSG00000006699	4938.96	4618.98	4773.37	4987.52	5208.54	5049.36
ENSMUSG00000032423	5077.18	4789.59	4903.96	4952.67	4761.86	5031.19
ENSMUSG00000003779	5023.48	4911	4966.94	5006.18	4719.85	4914.86
ENSMUSG00000062203	4836.83	4894.25	4908.59	5078.36	4835.62	5015.74
ENSMUSG00000029472	4907.27	4965.43	4964.16	4914.1	4898.12	4864.87
ENSMUSG00000034101	4857.96	4747.72	4939.15	4850.63	5049.74	5004.83
ENSMUSG00000027002	4872.93	4643.05	4946.56	4712.51	5013.88	5005.74
ENSMUSG00000016921	4730.31	4885.88	4765.96	5103.25	4844.84	4944.85
ENSMUSG00000051695	4897.58	4874.37	4886.36	4676.42	4873.53	4894.86
ENSMUSG00000076432	4787.53	4904.72	4753.92	5032.32	4861.23	4847.61
ENSMUSG00000068739	4728.55	4827.27	4843.76	5135.6	4845.87	4816.71
ENSMUSG00000032966	4841.24	4687.01	4838.2	5048.49	4827.43	4902.14
ENSMUSG00000037072	4854.44	4697.48	4641.86	5337.19	4908.36	4783.08
ENSMUSG00000022010	4666.04	4774.93	4761.33	5447.94	4632.77	4923.95
ENSMUSG00000035247	4944.24	4687.01	4897.47	4607.98	5112.24	4714.01
ENSMUSG00000006740	4954.81	4799.01	4830.79	4797.13	4921.68	4641.31
ENSMUSG00000079477	4945.12	4716.32	4604.81	5085.82	4836.65	4800.35
ENSMUSG00000055980	4979.46	4617.93	4841.91	4691.35	4983.15	4738.55
ENSMUSG00000030189	4759.36	4804.24	4678.9	4564.42	4948.32	5082.08
ENSMUSG00000027469	4909.03	4826.22	4875.25	4785.93	4778.25	4703.11
ENSMUSG00000062078	4949.52	4755.05	4868.76	4488.52	4738.29	4965.75
ENSMUSG00000016664	4846.52	4899.49	4722.43	4753.57	4926.8	4714.92
ENSMUSG00000001847	4757.6	4717.37	4860.43	4886.72	4697.31	4933.94
ENSMUSG00000028464	4651.95	4850.29	4585.36	4929.03	4962.66	4893.96
ENSMUSG00000026229	4751.44	4792.73	4847.46	4914.1	4768	4756.73
ENSMUSG00000030342	4820.99	4797.96	4726.14	5094.53	4762.88	4654.94
ENSMUSG00000056342	4986.5	4741.44	4961.38	4479.81	4839.72	4668.57
ENSMUSG00000041133	4694.21	5091.03	4752.99	4744.86	4844.84	4671.3
ENSMUSG00000016382	4793.7	4584.44	4657.6	4726.19	5014.91	4961.21
ENSMUSG00000060373	4635.23	4851.34	4693.72	5284.93	4481.15	4880.32
ENSMUSG00000001131	4713.58	4534.2	4694.65	4963.87	4740.34	5015.74
ENSMUSG00000024493	4753.2	4825.17	4744.66	4670.2	4773.13	4809.44
ENSMUSG00000001473	4834.19	4760.28	4775.22	4661.49	4666.58	4840.34
ENSMUSG00000020585	4700.38	4653.52	4684.46	5023.6	4838.69	4740.37
ENSMUSG00000022797	4655.48	4789.59	4515.9	4778.46	4885.82	4945.76
ENSMUSG00000012405	4803.38	4673.41	4680.76	5044.76	4651.21	4736.73
ENSMUSG00000003813	4637.87	4677.59	4717.8	4966.36	4949.34	4645.85
ENSMUSG00000020571	4700.38	4687.01	4655.75	4874.28	4847.92	4720.37
ENSMUSG00000031555	4570.96	4745.63	4736.32	4940.23	4703.46	4780.35
ENSMUSG00000027864	4651.95	4634.68	4822.46	4620.42	4850.99	4807.62
ENSMUSG00000033228	4923.11	4612.7	4779.85	4449.94	4633.8	4765.81
ENSMUSG00000005469	4638.75	4710.04	4625.19	4728.68	4748.54	4774.9
ENSMUSG00000029455	4592.09	4882.74	4678.9	4713.75	4840.74	4515.89
ENSMUSG00000041959	4578.88	4575.02	4424.21	5174.18	4778.25	4698.56
ENSMUSG00000028426	4813.94	4901.58	4673.35	4488.52	4661.46	4524.98
ENSMUSG00000043131	4828.91	4402.32	4666.86	4764.77	4746.49	4663.12
ENSMUSG00000032939	4577.12	4690.15	4627.96	4906.63	4718.83	4622.22
ENSMUSG00000001870	4619.38	4461.98	4739.1	4488.52	4738.29	4919.4
ENSMUSG00000003226	4731.19	4509.08	4821.53	4549.49	4694.24	4664.94
ENSMUSG00000022272	5135.29	5026.14	5245.71	3936.01	4254.73	4202.35
ENSMUSG00000021486	4525.18	4406.5	4745.59	4941.47	4668.63	4728.55
ENSMUSG00000003660	4723.27	4803.19	4750.22	4513.4	4578.47	4547.7
ENSMUSG00000062270	4392.24	4717.37	4577.95	4863.08	4616.38	4682.2
ENSMUSG00000029781	4397.52	4483.96	4389.94	4981.3	4884.8	4737.64
ENSMUSG00000033047	4524.3	4680.73	4529.79	4544.51	4717.8	4665.84
ENSMUSG00000001119	4363.19	4414.88	4422.36	4652.78	4897.09	4913.95
ENSMUSG00000068267	4478.52	4875.41	4540.91	4233.42	4756.74	4571.33
ENSMUSG00000044783	4530.46	4580.25	4732.62	4575.62	4638.92	4438.64
ENSMUSG00000005410	4733.83	4578.16	4603.89	4503.45	4467.83	4557.7
ENSMUSG00000011752	4553.35	4663.99	4593.7	4517.14	4566.18	4562.24
ENSMUSG00000055762	4312.13	4740.39	4271.4	4822.01	4763.91	4651.3
ENSMUSG00000028173	4530.46	4401.27	4623.33	4621.67	4430.95	4724.01
ENSMUSG00000043733	4452.11	4556.18	4663.16	4561.94	4680.92	4448.64
ENSMUSG00000025969	4756.72	4357.31	4612.22	4464.87	4490.37	4565.87
ENSMUSG00000021794	4594.73	4378.24	4493.67	4573.13	4774.15	4435.01
ENSMUSG00000043091	4329.73	4676.55	4479.78	4678.91	4559.01	4554.97
ENSMUSG00000014444	4555.11	4491.28	4625.19	4259.55	4703.46	4515.89
ENSMUSG00000000957	4376.39	4427.44	4479.78	4626.64	4765.96	4556.79
ENSMUSG00000039168	4489.08	4457.79	4513.12	4408.88	4578.47	4704.92
ENSMUSG00000022463	4463.55	4547.8	4593.7	4133.87	4637.89	4714.92
ENSMUSG00000029390	4665.16	4225.43	4476.08	4692.6	4520.08	4561.33
ENSMUSG00000038482	4526.06	4557.22	4501.08	4665.22	4259.85	4602.23
ENSMUSG00000029657	4406.33	4639.91	4496.45	4524.6	4473.97	4552.24
ENSMUSG00000043962	4504.93	4520.59	4521.46	4477.32	4510.86	4520.43
ENSMUSG00000028312	4477.64	4614.79	4625.19	4295.64	4445.29	4533.16
ENSMUSG00000026192	4642.27	4497.56	4393.65	4499.72	4549.79	4442.28
ENSMUSG00000002885	4298.04	4322.77	4423.29	4522.11	4762.88	4673.11
ENSMUSG00000054717	4552.47	4540.48	4524.24	4655.26	4360.26	4382.29
ENSMUSG00000038943	4435.38	4675.5	4600.18	4575.62	4414.55	4315.04
ENSMUSG00000020359	4486.44	4495.47	4365.86	4635.35	4414.55	4573.15
ENSMUSG00000033732	4440.66	4338.47	4456.63	4692.6	4533.4	4516.8
ENSMUSG00000062006	4254.02	4587.58	4304.74	4474.83	4479.1	4735.82
ENSMUSG00000032855	4432.74	4330.1	4597.4	4274.48	4658.38	4434.1
ENSMUSG00000033306	4753.2	4226.48	4625.19	4161.24	4554.91	4334.13
ENSMUSG00000084349	4433.62	5099.4	4231.57	4235.91	4376.65	4378.66
ENSMUSG00000035726	4450.35	4461.98	4533.5	4614.2	4345.91	4295.96
ENSMUSG00000008348	4137.81	5275.24	3252.63	2134.13	6023.01	5352
ENSMUSG00000038366	4536.62	4475.58	4347.34	4116.44	4356.16	4587.69
ENSMUSG00000032803	4127.24	4167.86	4277.88	4612.96	4653.26	4717.65
ENSMUSG00000024949	4389.6	4356.26	4647.41	4206.04	4461.68	4359.57
ENSMUSG00000031740	4306.84	4379.29	4425.14	4590.56	4355.13	4437.73
ENSMUSG00000035325	4430.1	4268.34	4300.11	4387.72	4708.58	4362.3
ENSMUSG00000020745	4460.91	4683.87	4428.84	4197.33	4325.42	4286.87
ENSMUSG00000029063	4392.24	4280.9	4395.5	4410.12	4451.44	4467.72
ENSMUSG00000006445	4400.16	4389.76	4452.92	4279.46	4402.26	4431.37
ENSMUSG00000006304	4370.23	4019.23	4378.83	4600.51	4378.7	4638.58
ENSMUSG00000031502	4574.48	4247.41	4323.26	4143.82	4350.01	4536.79
ENSMUSG00000020929	4313.01	4440	4429.77	4285.68	4403.28	4362.3
ENSMUSG00000024803	4361.43	4623.17	4407.54	4718.73	4067.25	4126.01
ENSMUSG00000030655	4417.77	4503.84	4570.54	4104	4417.63	4148.73
ENSMUSG00000026305	4293.64	4391.85	4383.46	4257.06	4427.87	4432.28
ENSMUSG00000032116	4435.38	4490.24	4374.2	4354.12	4198.38	4303.23
ENSMUSG00000020114	4350.86	4264.16	4316.78	4288.17	4472.95	4434.1
ENSMUSG00000030435	4307.72	4536.29	4323.26	4303.1	4468.85	4215.07
ENSMUSG00000001228	4255.78	4609.56	4343.64	4174.93	4364.35	4315.95
ENSMUSG00000001424	4364.95	4337.42	4294.55	4201.06	4308.01	4455.91
ENSMUSG00000058006	4356.14	4419.06	4429.77	4041.78	4480.12	4172.36
ENSMUSG00000041879	4292.76	4264.16	4343.64	4132.62	4343.86	4510.44
ENSMUSG00000002020	4299.8	4518.5	4196.38	4211.02	4354.11	4335.04
ENSMUSG00000028583	4291	4173.09	4416.8	4406.39	4152.28	4460.45
ENSMUSG00000023905	4342.94	4210.78	4229.72	4518.38	4296.74	4273.24
ENSMUSG00000040010	4288.36	4168.91	4158.41	4194.84	4502.66	4472.27
ENSMUSG00000032096	4336.78	4190.89	4128.77	4388.97	4339.77	4433.19
ENSMUSG00000030058	4065.62	4360.45	4100.06	4401.41	4491.39	4435.91
ENSMUSG00000027204	4100.83	4208.68	4251.02	4247.1	4444.26	4504.08
ENSMUSG00000036529	4171.26	4338.47	4508.49	4201.06	4292.64	4200.53
ENSMUSG00000007564	4265.47	4273.58	4293.63	4275.73	4270.1	4265.06
ENSMUSG00000022246	4218.8	4211.82	4207.49	4239.64	4314.15	4424.1
ENSMUSG00000030062	4186.23	4074.71	4345.49	4385.23	4250.63	4382.29
ENSMUSG00000073676	4182.71	4206.59	4253.8	4418.83	4360.26	4226.89
ENSMUSG00000030120	4131.65	4256.83	4149.15	4420.07	4236.29	4421.37
ENSMUSG00000037062	4372.87	4314.4	4408.47	3949.7	4305.96	4090.57
ENSMUSG00000005470	4099.07	4176.23	4367.72	4303.1	4226.05	4209.62
ENSMUSG00000079435	3981.98	4312.3	4125.99	4551.98	4318.25	4161.45
ENSMUSG00000038759	4403.69	4078.89	4113.03	4324.26	4178.92	4225.98
ENSMUSG00000029478	4185.35	4097.73	4331.6	3852.63	4470.9	4301.41
ENSMUSG00000026355	4077.94	4227.52	4317.71	4145.06	4233.22	4271.42
ENSMUSG00000025362	4175.67	3976.32	4273.25	4351.63	4176.87	4325.95
ENSMUSG00000020349	4096.43	3973.18	4273.25	4400.16	4191.21	4309.59
ENSMUSG00000000563	4114.04	4038.07	4191.75	4273.24	4230.14	4326.86
ENSMUSG00000004789	4160.7	4155.3	4193.6	4208.53	4001.68	4394.11
ENSMUSG00000022698	4317.41	4302.88	4291.77	3772.99	4200.43	4131.46
ENSMUSG00000002102	4213.52	4127.04	4106.54	4339.19	4180.97	4165.09
ENSMUSG00000054452	4162.46	4362.54	3978.73	4212.26	4145.11	4254.15
ENSMUSG00000032959	4150.13	4002.49	4100.99	4464.87	4148.18	4248.7
ENSMUSG00000024501	4274.27	4063.19	4266.77	4001.96	4179.94	4203.26
ENSMUSG00000030224	3989.9	4090.41	4303.81	4155.02	4167.65	4234.16
ENSMUSG00000037458	4269.87	4164.72	4227.87	4056.71	4082.62	4060.57
ENSMUSG00000001833	4134.29	4121.81	4055.61	4123.91	4175.85	4237.79
ENSMUSG00000045328	4038.33	4225.43	4181.56	3811.57	4280.34	4257.79
ENSMUSG00000031924	4181.83	4050.63	4211.2	3985.78	4251.66	4127.83
ENSMUSG00000018326	4179.19	4230.66	4134.33	4086.58	3964.8	4205.98
ENSMUSG00000028108	4122.84	4171	4147.29	4095.29	4082.62	4171.45
ENSMUSG00000008690	4157.18	4078.89	4041.71	4313.06	4069.3	4126.92
ENSMUSG00000051853	4069.14	4157.39	4075.05	4122.67	4132.82	4192.35
ENSMUSG00000037236	4150.13	4096.69	4186.19	4163.73	4124.62	4006.05
ENSMUSG00000007836	4018.08	3990.97	4213.98	3993.25	4243.46	4176.9
ENSMUSG00000060743	4201.2	4115.53	4212.12	4158.75	3883.86	4065.12
ENSMUSG00000032504	4176.55	3891.54	4277.88	3957.16	4021.15	4200.53
ENSMUSG00000025016	4121.08	4154.25	4049.12	3918.59	4105.16	4197.81
ENSMUSG00000021824	4087.63	3807.81	4068.57	4123.91	4192.24	4269.6
ENSMUSG00000021111	4206.48	4110.29	4100.99	3873.79	4175.85	4023.31
ENSMUSG00000039126	4018.96	3987.83	4146.37	3899.92	4401.24	4048.76
ENSMUSG00000090066	4114.04	4054.82	4155.63	4071.65	4102.08	3996.96
ENSMUSG00000006398	4040.97	4130.18	3961.14	4304.35	4070.32	4051.49
ENSMUSG00000056737	4000.47	4054.82	3885.19	4290.66	4086.71	4223.25
ENSMUSG00000001555	4010.15	3870.61	3969.47	4107.73	4199.41	4251.43
ENSMUSG00000024392	4249.62	3897.82	4054.68	3962.14	3987.34	4188.72
ENSMUSG00000046841	4044.49	3895.73	4125.07	4164.97	4006.8	4141.46
ENSMUSG00000092274	4021.6	4479.77	4082.46	4513.4	3700.48	3692.51
ENSMUSG00000005732	4129.89	4051.68	3922.24	4080.36	4083.64	4059.67
ENSMUSG00000079523	3971.42	3940.73	3910.2	4843.17	4020.12	3825.19
ENSMUSG00000021248	3965.25	3953.29	4170.45	4010.67	4118.47	4084.2
ENSMUSG00000031708	4025.12	4110.29	3938.91	4178.66	4134.87	3912.44
ENSMUSG00000028936	4140.45	4007.72	3737.01	4099.02	4009.88	4227.8
ENSMUSG00000097412	3894.82	4057.96	3930.57	4229.68	4010.9	4115.1
ENSMUSG00000074656	3988.14	4143.79	3837.96	4352.88	3903.33	4031.49
ENSMUSG00000033307	3999.59	3913.52	3903.72	4064.18	4075.45	4196.9
ENSMUSG00000074305	4092.91	3934.45	4197.31	3700.82	4195.31	3953.33
ENSMUSG00000042688	4109.64	4175.19	4085.24	3914.85	3932.02	3913.35
ENSMUSG00000027893	4119.32	4231.71	4140.81	3936.01	3807.03	3841.55
ENSMUSG00000011257	3969.66	3945.97	3852.78	4095.29	4080.57	4142.37
ENSMUSG00000063511	3891.3	4221.24	3857.41	4242.13	3903.33	4026.04
ENSMUSG00000032383	4060.34	4022.37	3812.95	4320.52	3912.55	3960.61
ENSMUSG00000056758	4189.75	4165.77	4081.54	4087.82	3745.56	3751.58
ENSMUSG00000017221	4071.78	3904.1	4072.28	3968.36	3988.36	3970.6
ENSMUSG00000057863	4143.09	3843.39	3895.38	4162.49	3987.34	3948.79
ENSMUSG00000041431	4062.98	3935.5	4033.38	4235.91	3757.85	3937.89
ENSMUSG00000024085	3881.62	4042.26	3868.52	3924.81	4210.68	3986.05
ENSMUSG00000027878	3871.93	4001.44	4155.63	3352.39	4316.2	4019.68
ENSMUSG00000056612	3790.94	4006.67	3869.45	4108.98	4054.96	4014.23
ENSMUSG00000021595	3724.91	3985.74	3880.56	3982.05	4074.42	4154.18
ENSMUSG00000031299	3834.08	4035.98	3968.55	4141.33	3991.44	3865.18
ENSMUSG00000032115	4062.98	4104.01	3924.09	3683.4	4033.44	3892.44
ENSMUSG00000019818	4047.13	3808.85	3974.1	3880.01	3877.72	4104.2
ENSMUSG00000024593	3973.18	3769.08	3934.28	3857.61	4217.85	3935.16
ENSMUSG00000022551	4004.87	3737.68	4003.74	3954.67	3899.23	4000.59
ENSMUSG00000052456	3924.76	3954.34	3838.89	3882.5	3986.31	4004.23
ENSMUSG00000033955	3819.11	4032.84	3748.12	3903.65	4136.92	3966.97
ENSMUSG00000066232	3987.26	3840.25	3991.7	3903.65	3895.13	3930.61
ENSMUSG00000053617	4150.13	3918.75	4029.67	3595.04	3874.64	3890.63
ENSMUSG00000034248	3939.72	3903.05	3827.77	4092.8	3903.33	3902.44
ENSMUSG00000020029	4155.42	4075.75	3936.13	3751.84	3653.35	3893.35
ENSMUSG00000021549	3988.14	3972.13	3787.95	3922.32	3951.48	3901.53
ENSMUSG00000021143	4004.87	3896.77	3971.33	3687.13	3952.51	3927.89
ENSMUSG00000067288	3918.59	3965.85	3800.91	4332.97	3881.82	3695.23
ENSMUSG00000029713	3871.05	3801.53	3895.38	3942.23	4060.08	3909.71
ENSMUSG00000001794	3930.04	3833.97	4023.19	3887.48	3942.26	3808.83
ENSMUSG00000020594	3945	3839.21	3851.85	3704.55	3967.87	4062.39
ENSMUSG00000078578	3923	3962.71	3666.62	4128.89	3742.48	4042.4
ENSMUSG00000031453	3830.55	3835.02	3941.69	3980.81	3885.91	3877.9
ENSMUSG00000022043	3886.02	4006.67	4025.97	3728.19	3839.81	3708.86
ENSMUSG00000019370	3876.33	3952.25	3812.95	3965.87	3811.13	3803.38
ENSMUSG00000037503	3988.14	3864.33	3832.4	3754.33	3781.41	3912.44
ENSMUSG00000021877	3702.02	3713.6	3798.14	4030.58	3859.28	4093.29
ENSMUSG00000021134	3793.58	4020.28	3701.82	4110.22	3791.66	3727.04
ENSMUSG00000027479	3898.34	3783.73	3839.81	3772.99	3868.5	3844.28
ENSMUSG00000041638	3832.32	3858.05	3812.95	3672.2	3895.13	3918.8
ENSMUSG00000020741	3823.51	3867.47	4020.41	3684.64	3812.15	3777.03
ENSMUSG00000002718	4033.92	3686.39	3923.17	3761.79	3697.41	3835.19
ENSMUSG00000001517	3867.53	3805.71	3931.5	3539.05	3754.78	3978.78
ENSMUSG00000000751	3819.99	3841.3	3667.55	3970.85	3767.07	3904.26
ENSMUSG00000030352	3831.44	3777.45	3807.4	3580.11	3894.11	3976.96
ENSMUSG00000019849	3825.27	3793.15	3821.29	3860.1	3796.78	3788.84
ENSMUSG00000039952	3813.83	3768.03	3694.41	3776.73	4069.3	3737.04
ENSMUSG00000016534	3793.58	3891.54	3891.68	3661	3705.6	3835.19
ENSMUSG00000021484	3865.77	3734.54	3709.23	3866.32	3802.93	3838.82
ENSMUSG00000023088	3954.69	4080.99	3816.66	3591.31	3754.78	3578.9
ENSMUSG00000029334	3665.04	3714.65	3862.97	4043.02	3779.37	3787.02
ENSMUSG00000029328	3923	3840.25	3813.88	3949.7	3582.66	3667.97
ENSMUSG00000027404	3767.17	3811.99	3700.89	3950.94	3629.79	3915.16
ENSMUSG00000015176	3836.72	3703.14	3825.92	3815.3	3721.99	3824.28
ENSMUSG00000018965	3714.34	3811.99	3765.72	4044.27	3623.64	3757.03
ENSMUSG00000068882	3707.3	3897.82	3567.52	4132.62	3785.51	3642.52
ENSMUSG00000055204	3658.88	3836.07	3921.31	3723.22	3841.86	3636.16
ENSMUSG00000003808	3668.56	3720.93	3727.75	4036.8	3575.49	3896.99
ENSMUSG00000020456	3833.2	3720.93	3712.93	3587.58	3888.99	3766.12
ENSMUSG00000040354	3655.36	3748.14	3806.47	3772.99	3893.09	3687.05
ENSMUSG00000021477	3742.52	3747.1	3745.35	4104	3570.37	3687.05
ENSMUSG00000036275	3898.34	3696.86	3541.59	3822.77	3775.27	3780.66
ENSMUSG00000041891	3700.26	3737.68	3715.71	3571.4	3834.69	3885.17
ENSMUSG00000038252	3724.03	3730.35	3842.59	3768.01	3674.87	3715.23
ENSMUSG00000035152	3535.63	3686.39	3733.31	3648.55	4023.2	3820.65
ENSMUSG00000032340	3724.03	3800.48	3909.27	3652.29	3731.21	3596.17
ENSMUSG00000042331	3761.88	3659.18	3788.87	3578.87	3765.02	3783.39
ENSMUSG00000015714	3758.36	3714.65	3764.79	3896.19	3516.07	3745.22
ENSMUSG00000041859	3760.12	3863.28	3899.09	3550.25	3654.38	3588.9
ENSMUSG00000021577	3715.22	3801.53	3797.21	3748.1	3577.54	3697.96
ENSMUSG00000024735	3620.14	3614.17	3737.01	3952.18	3702.53	3739.76
ENSMUSG00000020923	3834.96	3808.85	3666.62	3736.9	3483.29	3766.12
ENSMUSG00000071072	3703.78	3893.63	3723.12	3587.58	3686.14	3693.41
ENSMUSG00000037679	3642.15	3687.44	3826.85	3420.83	3832.64	3800.65
ENSMUSG00000004264	3687.93	3643.48	3637.91	3751.84	3873.62	3696.14
ENSMUSG00000032336	3733.71	3521.02	3580.49	4023.11	3785.51	3687.96
ENSMUSG00000003360	3821.75	3940.73	3712.93	3606.24	3565.25	3598.9
ENSMUSG00000034667	3773.33	3732.44	3888.9	3703.31	3618.52	3508.93
ENSMUSG00000066306	3736.35	3968.99	3591.6	3622.42	3690.23	3609.8
ENSMUSG00000064193	3673.85	3584.86	3692.55	3862.59	3785.51	3637.07
ENSMUSG00000041740	3502.17	3711.51	3835.18	3628.64	3655.4	3813.38
ENSMUSG00000032097	3673.85	3772.22	3770.35	3435.76	3562.17	3841.55
ENSMUSG00000027620	3636.87	3746.05	3693.48	3889.96	3405.42	3740.67
ENSMUSG00000028556	3827.91	3504.27	3651.8	3606.24	3793.71	3607.08
ENSMUSG00000058290	3597.25	3605.8	3635.13	3605	3767.07	3794.29
ENSMUSG00000028788	3715.22	3608.94	3729.6	3469.36	3696.38	3725.22
ENSMUSG00000025757	3679.13	3664.41	3611.98	3643.58	3741.46	3613.44
ENSMUSG00000026020	3678.25	3825.6	3518.44	3908.63	3479.19	3566.18
ENSMUSG00000026083	3422.06	3862.23	3574.01	3718.24	3728.14	3654.34
ENSMUSG00000027087	3625.43	3536.72	3737.01	3541.54	3796.78	3619.8
ENSMUSG00000010095	3622.78	3687.44	3581.42	3718.24	3553.98	3709.77
ENSMUSG00000024512	3427.34	3597.42	3478.61	4018.14	3698.43	3710.68
ENSMUSG00000038762	3610.46	3771.17	3502.69	3626.15	3577.54	3696.14
ENSMUSG00000026674	3623.66	3514.74	3631.43	3606.24	3859.28	3524.38
ENSMUSG00000037364	3629.83	3648.71	3601.79	3560.2	3674.87	3626.16
ENSMUSG00000060860	3628.07	3876.89	3587.9	3629.89	3499.68	3538.92
ENSMUSG00000020900	3724.03	3731.4	3526.77	3486.78	3714.82	3531.65
ENSMUSG00000018501	3648.32	3491.71	3786.1	3397.19	3982.22	3380.78
ENSMUSG00000037470	3479.28	3573.35	3809.25	3489.27	3685.11	3656.15
ENSMUSG00000037373	3548.83	3657.08	3524	3474.34	3685.11	3797.93
ENSMUSG00000004530	3661.52	3525.2	3586.97	3402.16	3776.29	3702.5
ENSMUSG00000027006	3526.82	3444.61	3738.86	3577.62	3608.28	3729.77
ENSMUSG00000024012	3599.89	3495.9	3567.52	3652.29	3587.79	3738.86
ENSMUSG00000062937	3591.97	3746.05	3519.36	3555.22	3589.83	3635.25
ENSMUSG00000027342	3752.2	3645.57	3635.13	3817.79	3540.66	3283.54
ENSMUSG00000031503	3537.39	3511.6	3493.43	3525.36	3749.66	3781.57
ENSMUSG00000027699	3613.1	3534.62	3450.83	3576.38	3743.51	3678.87
ENSMUSG00000039515	3620.14	3572.3	3407.3	3728.19	3617.5	3668.88
ENSMUSG00000048376	3805.9	3611.03	3692.55	3474.34	3388.01	3551.64
ENSMUSG00000027220	3659.76	3615.22	3566.6	3509.18	3519.14	3627.07
ENSMUSG00000013236	3602.54	3678.02	3608.28	3214.26	3679.99	3661.61
ENSMUSG00000021806	3580.53	3499.04	3607.35	3473.09	3689.21	3612.53
ENSMUSG00000029201	3846.4	3684.3	3822.22	3496.74	3166.72	3398.96
ENSMUSG00000023951	3547.95	3583.82	3602.72	3672.2	3659.5	3438.04
ENSMUSG00000005973	3559.4	3588	3570.3	3643.58	3532.46	3583.45
ENSMUSG00000028745	3610.46	3434.14	3450.83	3580.11	3631.84	3729.77
ENSMUSG00000032050	3562.92	3588	3613.83	3434.52	3607.25	3608.89
ENSMUSG00000057406	3716.1	3702.09	3671.25	3292.66	3496.61	3474.39
ENSMUSG00000090862	3516.26	3525.2	3626.8	3690.86	3692.28	3407.14
ENSMUSG00000025781	3501.29	3545.09	3622.17	3639.84	3615.45	3505.29
ENSMUSG00000029247	3543.55	3697.9	3586.97	3709.53	3489.43	3423.5
ENSMUSG00000050953	3507.45	3619.4	3493.43	3563.93	3629.79	3575.27
ENSMUSG00000028410	3518.02	3578.58	3553.63	3751.84	3440.26	3513.47
ENSMUSG00000029752	3410.61	3523.11	3489.73	3664.73	3513	3693.41
ENSMUSG00000010608	3485.44	3629.87	3540.67	3471.85	3493.53	3597.08
ENSMUSG00000021771	3422.06	3648.71	3413.78	3622.42	3522.22	3559.82
ENSMUSG00000002028	3572.6	3353.55	3820.36	3361.1	3756.83	3218.11
ENSMUSG00000028849	3502.17	3623.59	3374.89	3463.14	3551.93	3581.63
ENSMUSG00000034892	3464.31	3509.5	3420.27	3914.85	3474.07	3404.41
ENSMUSG00000003316	3601.65	3593.24	3598.09	3191.86	3620.57	3393.51
ENSMUSG00000021377	3643.03	3568.12	3519.36	3509.18	3437.18	3341.7
ENSMUSG00000024620	3448.47	3331.57	3602.72	3582.6	3521.19	3528.01
ENSMUSG00000005354	3319.93	3640.34	3384.15	3712.02	3593.93	3446.22
ENSMUSG00000022255	3599.89	3459.26	3497.14	3315.06	3626.72	3458.94
ENSMUSG00000059751	3341.06	3315.87	3517.51	3728.19	3565.25	3578.9
ENSMUSG00000002870	3627.19	3692.67	3811.1	3272.75	3233.31	3263.55
ENSMUSG00000025060	3528.58	3616.26	3621.24	3267.77	3384.93	3450.76
ENSMUSG00000062867	3479.28	3501.13	3455.46	3605	3334.73	3557.09
ENSMUSG00000019087	3504.81	3316.91	3459.17	3694.6	3469.97	3490.75
ENSMUSG00000020088	3417.65	3548.23	3586.05	3410.87	3369.57	3550.73
ENSMUSG00000017009	3523.3	3412.16	3405.45	3398.43	3466.89	3638.89
ENSMUSG00000022312	3405.33	3599.52	3443.42	3433.27	3536.56	3467.12
ENSMUSG00000022505	3523.3	3340.99	3583.27	3510.43	3400.3	3471.66
ENSMUSG00000042644	3503.93	3549.28	3498.99	3275.24	3538.61	3421.68
ENSMUSG00000039323	3402.69	3160.96	3624.02	3474.34	3478.16	3639.79
ENSMUSG00000015932	3422.06	3395.42	3311.91	3553.98	3499.68	3639.79
ENSMUSG00000031700	3403.57	3431	3504.55	3471.85	3610.32	3386.24
ENSMUSG00000020671	3550.59	3391.23	3474.91	3288.92	3414.65	3578.9
ENSMUSG00000038119	3372.75	3354.59	3547.15	3373.54	3639.01	3461.67
ENSMUSG00000052429	3388.6	3439.38	3432.31	3692.11	3341.91	3511.65
ENSMUSG00000036112	3540.03	3474.96	3432.31	3524.11	3367.52	3395.32
ENSMUSG00000015766	3473.12	3540.9	3445.27	3349.9	3610.32	3305.35
ENSMUSG00000020149	3393	3529.39	3329.5	3570.16	3511.97	3391.69
ENSMUSG00000064210	3402.69	3464.5	3344.32	3417.1	3545.78	3488.02
ENSMUSG00000029147	3424.7	3589.05	3282.27	3371.05	3534.51	3457.12
ENSMUSG00000017421	3460.79	3449.84	3393.41	3496.74	3432.06	3354.43
ENSMUSG00000032193	3487.2	3382.85	3461.94	3301.37	3542.71	3335.34
ENSMUSG00000029484	3478.4	3429.96	3364.7	3440.74	3417.72	3377.15
ENSMUSG00000041028	3341.94	3546.14	3340.62	3514.16	3378.79	3408.05
ENSMUSG00000038429	3293.52	3368.2	3421.19	3544.02	3365.47	3457.12
ENSMUSG00000029730	3273.27	3572.3	3387.85	3381.01	3453.58	3366.24
ENSMUSG00000034807	3263.59	3340.99	3386.93	3463.14	3430.01	3535.28
ENSMUSG00000022992	3483.68	3288.65	3402.67	3451.94	3368.54	3396.23
ENSMUSG00000019978	3430.86	3503.22	3414.71	3408.39	3285.56	3357.15
ENSMUSG00000028851	3437.9	3588	3322.1	3306.35	3451.53	3293.54
ENSMUSG00000007670	3469.6	3357.73	3360.07	3373.54	3334.73	3458.94
ENSMUSG00000020823	3498.65	3266.67	3351.73	3510.43	3311.17	3399.87
ENSMUSG00000037071	3304.97	3322.15	3511.96	3321.28	3497.63	3323.53
ENSMUSG00000001642	3308.49	3414.26	3310.98	3558.96	3248.68	3478.03
ENSMUSG00000014498	3456.39	3378.67	3611.98	3261.55	3323.47	3209.02
ENSMUSG00000032637	3426.46	3389.13	3422.12	3260.3	3370.59	3339.89
ENSMUSG00000081534	3607.82	3358.78	3412.86	3262.79	3298.88	3239.92
ENSMUSG00000063358	3388.6	3286.56	3480.47	3384.74	3383.91	3239.92
ENSMUSG00000038650	3373.64	3460.31	3395.26	3466.87	3231.26	3259
ENSMUSG00000019942	3348.98	3368.2	3266.53	3734.42	3145.2	3369.88
ENSMUSG00000021288	3279.43	3390.18	3346.18	3301.37	3500.7	3328.07
ENSMUSG00000028809	3346.34	3392.28	3390.63	3331.23	3361.37	3298.08
ENSMUSG00000020496	3361.31	3260.39	3466.57	3399.67	3352.15	3280.81
ENSMUSG00000022185	3358.67	3411.12	3327.65	3390.96	3346	3277.18
ENSMUSG00000022336	3357.79	3322.15	3335.06	3532.82	3241.51	3292.63
ENSMUSG00000029505	3407.09	3275.05	3534.18	3198.08	3437.18	3149.94
ENSMUSG00000031703	3338.42	3267.72	3293.38	3504.2	3369.57	3298.99
ENSMUSG00000027593	3175.55	3388.09	3224.85	3493	3392.11	3369.88
ENSMUSG00000007655	3189.63	3375.53	3322.1	3532.82	3290.68	3303.53
ENSMUSG00000063694	3055.82	3365.06	3287.83	3754.33	3243.55	3338.07
ENSMUSG00000021109	3430.86	3322.15	3432.31	3101.02	3289.66	3256.28
ENSMUSG00000022752	3347.22	3282.37	3451.76	3107.24	3232.29	3397.14
ENSMUSG00000028953	3121.85	3190.27	3335.99	3490.52	3346	3434.4
ENSMUSG00000019132	3414.13	3224.81	3269.3	3361.1	3311.17	3288.99
ENSMUSG00000019877	3302.32	3167.24	3234.11	3379.76	3275.31	3439.86
ENSMUSG00000020917	3292.64	3150.49	3333.21	3413.36	3358.3	3266.27
ENSMUSG00000026491	3314.65	3378.67	3248	3225.46	3296.83	3296.26
ENSMUSG00000017776	3280.31	2991.4	3232.26	3417.1	3489.43	3335.34
ENSMUSG00000000555	3238.06	3225.85	3277.64	3162	3336.78	3413.5
ENSMUSG00000032458	3274.15	3228.99	3279.49	3341.19	3240.48	3311.71
ENSMUSG00000009013	3058.46	3235.27	3226.7	3530.34	3252.77	3407.14
ENSMUSG00000000568	3322.57	3322.15	3139.64	3371.05	3172.86	3291.72
ENSMUSG00000002052	3219.57	3309.59	3133.16	3379.76	3264.04	3316.26
ENSMUSG00000089715	3304.97	3241.55	3332.28	3270.26	3275.31	3149.94
ENSMUSG00000028156	3137.69	3300.17	3320.24	3397.19	3201.55	3253.55
ENSMUSG00000055436	3239.82	3362.97	3338.77	3275.24	3099.1	3254.46
ENSMUSG00000004356	3319.05	3237.37	3335.99	3290.17	3239.46	3131.77
ENSMUSG00000026879	3179.07	3245.74	3195.21	3198.08	3499.68	3240.83
ENSMUSG00000005506	3238.94	3230.04	3139.64	3317.54	3233.31	3374.42
ENSMUSG00000023495	3110.4	3299.12	3198.92	3341.19	3163.64	3423.5
ENSMUSG00000022982	3337.54	3418.44	3165.58	3582.6	3086.81	2959.09
ENSMUSG00000002957	3181.71	3233.18	3157.24	3159.51	3423.87	3293.54
ENSMUSG00000022108	3147.38	3131.65	3242.45	3497.98	3121.64	3339.89
ENSMUSG00000040084	3226.61	3342.03	3047.96	3132.13	3348.05	3318.07
ENSMUSG00000020859	3221.33	3291.79	3290.61	3311.32	3171.84	3139.95
ENSMUSG00000022557	3193.16	3292.84	3029.43	3432.03	3198.48	3294.45
ENSMUSG00000018932	3003.87	3218.53	3166.5	3269.01	3288.63	3456.21
ENSMUSG00000032555	3120.96	3221.67	3335.99	3152.04	3348.05	3188.11
ENSMUSG00000052337	3195.8	3255.16	3216.51	3216.75	3287.61	3188.11
ENSMUSG00000028484	3137.69	3196.55	3219.29	3349.9	3216.92	3258.09
ENSMUSG00000075700	3506.57	3601.61	3564.75	2858.36	2758.97	2933.65
ENSMUSG00000020330	3216.05	3232.13	3242.45	3077.38	3225.11	3294.45
ENSMUSG00000053510	3201.96	3213.29	3223.92	3106	3226.14	3318.07
ENSMUSG00000071650	3272.39	3171.43	3235.04	3160.75	3206.67	3243.55
ENSMUSG00000018446	3044.37	3287.61	3130.38	3149.55	3405.42	3303.53
ENSMUSG00000021756	3181.71	3222.71	3250.78	3043.78	3422.84	3160.85
ENSMUSG00000022231	3501.29	3426.82	3536.04	2783.7	3069.39	2870.94
ENSMUSG00000042323	3422.06	3445.66	3399.89	2776.24	3084.76	3052.7
ENSMUSG00000024590	3265.35	3377.62	3296.16	3160.75	3054.02	3118.14
ENSMUSG00000022377	3258.3	3241.55	3273.94	3094.8	3132.91	3227.19
ENSMUSG00000050912	3184.35	3053.15	3179.47	3285.19	3371.62	3193.57
ENSMUSG00000028790	3234.53	3060.48	3341.54	3203.06	3171.84	3180.84
ENSMUSG00000040725	3228.37	3257.25	3328.58	3057.47	3079.64	3214.47
ENSMUSG00000020099	3141.21	3074.09	3147.05	3115.95	3326.54	3378.06
ENSMUSG00000037149	3111.28	3030.13	3107.23	3443.23	3219.99	3306.26
ENSMUSG00000035569	3225.73	3308.54	3272.08	2925.56	3283.51	3074.51
ENSMUSG00000028757	3044.37	3080.37	3179.47	3412.12	3172.86	3289.9
ENSMUSG00000001098	3273.27	3003.96	3086.85	3266.52	3277.36	3222.65
ENSMUSG00000046062	3206.36	3126.42	3127.6	3133.38	3258.92	3245.37
ENSMUSG00000032440	3180.83	3079.32	3243.37	3132.13	3155.45	3251.73
ENSMUSG00000019471	3194.92	3263.53	3022.02	3224.22	3284.53	3112.68
ENSMUSG00000054408	3171.15	3284.47	3150.76	3183.15	3168.77	3106.32
ENSMUSG00000033952	3393.88	3193.41	3211.88	2919.34	3158.52	3087.24
ENSMUSG00000037119	3388.6	3162.01	3433.23	3006.45	2908.54	3056.34
ENSMUSG00000031754	3160.58	3176.66	3147.98	3249.1	3043.78	3250.82
ENSMUSG00000012443	3116.56	3174.57	3070.18	3058.71	3262	3319.89
ENSMUSG00000015733	3229.25	3145.26	3161.87	3083.6	3203.6	3162.67
ENSMUSG00000022858	3170.27	3198.64	3135.01	3138.35	3103.2	3245.37
ENSMUSG00000030770	3212.52	3069.9	3048.88	3102.27	3266.09	3274.45
ENSMUSG00000037933	3163.22	3136.89	3217.44	3068.67	3174.91	3203.56
ENSMUSG00000020074	3193.16	3210.15	3196.14	3213.02	3070.41	3107.23
ENSMUSG00000041313	3238.94	2973.6	3320.24	2939.25	3215.89	3196.29
ENSMUSG00000026970	3212.52	3210.15	3167.43	3239.15	2981.28	3139.95
ENSMUSG00000023025	3135.93	3093.97	3027.58	3048.76	3200.53	3401.69
ENSMUSG00000020706	3102.48	3222.71	3237.82	3178.17	3140.08	3070.88
ENSMUSG00000022956	3016.2	3319.01	3087.78	3408.39	3107.3	3070.88
ENSMUSG00000022350	3165.86	2969.42	3172.99	3203.06	3130.86	3229.92
ENSMUSG00000022261	3291.76	3159.91	3085	2893.21	3134.96	3215.38
ENSMUSG00000024613	3127.13	3107.58	3219.29	3031.34	3245.6	3069.06
ENSMUSG00000020238	3101.6	3158.87	3023.88	3017.65	3356.25	3140.86
ENSMUSG00000002524	3194.04	3121.19	3080.37	3200.57	3124.71	3089.96
ENSMUSG00000029623	3068.14	3194.45	3073.89	3246.61	3115.49	3119.04
ENSMUSG00000052533	3143.85	3088.74	3327.65	3010.18	3044.8	3092.69
ENSMUSG00000024097	2979.22	3332.61	3154.46	3257.81	3054.02	3003.63
ENSMUSG00000020737	3019.72	3180.85	3050.73	3273.99	3137.01	3102.69
ENSMUSG00000020841	2995.95	3127.47	3094.26	2872.05	3292.73	3274.45
ENSMUSG00000052397	3229.25	3035.36	3078.52	2996.49	3235.36	3073.6
ENSMUSG00000035199	2996.83	2977.79	2987.76	3343.68	3200.53	3197.2
ENSMUSG00000007817	3109.52	3097.11	3168.35	2842.19	3229.21	3116.32
ENSMUSG00000062611	2967.78	3204.92	2943.3	3434.52	2996.65	3160.85
ENSMUSG00000036712	3104.24	3107.58	3122.05	3018.89	3034.56	3187.21
ENSMUSG00000001415	3089.27	3153.63	3014.61	3154.53	3251.75	2975.45
ENSMUSG00000001576	3035.57	3107.58	3049.81	3043.78	2993.58	3341.7
ENSMUSG00000042524	3035.57	3109.67	2951.64	3188.13	3134.96	3197.2
ENSMUSG00000017781	2967.78	3018.61	3097.97	3262.79	3131.88	3129.95
ENSMUSG00000029823	3075.18	3194.45	3043.32	3118.44	3024.31	3118.14
ENSMUSG00000017631	3034.69	3061.53	3174.84	3114.71	3227.16	2964.55
ENSMUSG00000038612	3042.61	3015.47	3158.17	3281.46	3021.24	3042.7
ENSMUSG00000026701	3083.99	3012.33	3073.89	3220.48	3102.17	3056.34
ENSMUSG00000037608	3067.26	3102.35	3137.79	3098.53	2922.89	3155.4
ENSMUSG00000064360	3167.63	3042.69	3025.73	3154.53	2972.06	3128.13
ENSMUSG00000006676	3180.83	3055.25	3061.85	2950.45	3179.01	3007.26
ENSMUSG00000023977	3050.53	3225.85	3050.73	3017.65	3048.9	3061.79
ENSMUSG00000028195	3261.83	3332.61	3147.05	3059.96	2754.87	2880.94
ENSMUSG00000045482	3201.08	3123.28	3122.97	2868.32	3213.84	2874.57
ENSMUSG00000034160	3075.18	3098.16	3061.85	3056.22	3075.54	3061.79
ENSMUSG00000023022	3025	3134.79	3053.51	3103.51	2955.67	3148.13
ENSMUSG00000026604	2972.18	3057.34	3124.83	3030.09	3153.4	3067.24
ENSMUSG00000002812	2965.14	3055.25	2895.14	3148.31	3190.28	3171.76
ENSMUSG00000021178	3021.48	3095.02	2940.52	3165.73	3134.96	3059.06
ENSMUSG00000028676	3119.2	3154.68	3025.73	3088.58	3049.92	2911.84
ENSMUSG00000032481	3185.23	3153.63	3107.23	3003.96	2947.48	2916.38
ENSMUSG00000025162	3054.06	3053.15	2970.16	3022.62	3072.46	3099.96
ENSMUSG00000021782	3211.64	2996.63	3155.39	2822.28	3188.23	2839.13
ENSMUSG00000027423	3040.85	3166.19	3014.61	3033.82	3001.77	3015.44
ENSMUSG00000004655	2989.79	2947.44	3019.24	3144.57	3125.74	3032.71
ENSMUSG00000022673	2995.07	2998.73	3132.23	3047.51	3025.34	3027.25
ENSMUSG00000013033	3037.33	3030.13	3037.77	2981.56	3183.11	2956.37
ENSMUSG00000038539	2935.2	3076.18	3024.8	3079.87	3079.64	3035.43
ENSMUSG00000031647	3315.53	3077.23	3086.85	2843.43	2879.86	2928.19
ENSMUSG00000031592	3051.41	2905.57	3100.75	2896.94	3030.46	3139.04
ENSMUSG00000063273	3086.63	3073.04	2965.53	2914.36	3046.85	3057.25
ENSMUSG00000040785	3144.74	2905.57	3177.62	2976.58	2985.38	2920.01
ENSMUSG00000001280	3030.28	2954.76	3154.46	2819.79	3024.31	3089.05
ENSMUSG00000014349	3128.89	2929.64	2918.29	3011.42	3024.31	3096.32
ENSMUSG00000029106	3017.96	2996.63	3047.96	2923.07	3030.46	3078.15
ENSMUSG00000000838	2996.83	3102.35	3061.85	2974.09	2944.4	3024.53
ENSMUSG00000075706	3002.99	3020.71	2972.01	3153.29	2992.55	2994.54
ENSMUSG00000026827	3135.93	2943.25	2902.55	2957.92	3030.46	3094.51
ENSMUSG00000015120	3028.52	3081.41	3061.85	2976.58	2967.97	2937.28
ENSMUSG00000062075	3037.33	3131.65	2921.07	3028.85	3000.75	2910.02
ENSMUSG00000022710	3093.67	2950.58	3039.62	3112.22	2840.93	2958.19
ENSMUSG00000040618	2971.3	2878.36	2931.26	3099.78	3033.53	3090.87
ENSMUSG00000026103	2868.29	2989.3	2917.37	2946.72	3127.79	3134.49
ENSMUSG00000005312	2992.43	3073.04	3082.22	2840.94	2949.52	2997.26
ENSMUSG00000004665	3001.23	2795.67	2941.45	3021.38	3092.95	3101.78
ENSMUSG00000028796	2995.07	3085.6	2884.03	2772.5	3034.56	3145.4
ENSMUSG00000020827	2791.7	3095.02	3001.65	2839.7	3198.48	2999.08
ENSMUSG00000030516	3018.84	3040.59	3044.25	2722.73	3014.07	2995.45
ENSMUSG00000025651	2988.91	3018.61	3002.57	2990.27	2904.45	2973.63
ENSMUSG00000031776	3413.25	3292.84	3275.79	2691.62	2536.65	2571.03
ENSMUSG00000020532	2865.65	2895.1	3082.22	2865.83	3150.33	2999.99
ENSMUSG00000024660	2992.43	3016.52	2928.48	3083.6	3009.97	2861.85
ENSMUSG00000028560	3059.34	2978.84	3020.17	3053.73	2905.47	2843.67
ENSMUSG00000038633	2968.66	2851.14	2902.55	3201.82	2979.23	2974.54
ENSMUSG00000005483	3042.61	3035.36	2916.44	3086.09	2939.28	2841.86
ENSMUSG00000038335	2886.78	3060.48	2887.73	3128.4	2980.26	2937.28
ENSMUSG00000066324	3033.81	3041.64	2942.37	2796.15	2949.52	3015.44
ENSMUSG00000023169	3069.02	2918.13	2950.71	2827.26	3082.71	2920.01
ENSMUSG00000031565	2891.18	2964.18	2911.81	2987.78	3028.41	3030.89
ENSMUSG00000017999	2951.05	3104.44	2819.2	2997.74	2984.36	2960
ENSMUSG00000022614	2916.72	2878.36	3019.24	3064.93	2955.67	2966.36
ENSMUSG00000017291	3055.82	2978.84	3091.48	2602.02	3054.02	2910.02
ENSMUSG00000029110	3038.21	2974.65	3219.29	2789.92	2850.15	2832.77
ENSMUSG00000028433	2946.65	2963.14	2954.41	2761.3	2980.26	3055.43
ENSMUSG00000020362	2934.32	2858.47	3028.51	2868.32	2935.18	3016.35
ENSMUSG00000004263	2916.72	2893.01	3138.72	2714.02	2974.11	2971.82
ENSMUSG00000005846	3002.11	2763.22	2963.68	3031.34	2930.06	2970.91
ENSMUSG00000063011	2912.31	3100.25	2947.93	3005.2	2986.41	2742.8
ENSMUSG00000049354	3025.88	2938.02	2956.27	2765.04	2948.5	2961.82
ENSMUSG00000020592	2926.4	2998.73	2792.34	2965.38	3089.88	2896.39
ENSMUSG00000001507	2914.95	2993.49	2967.38	2895.7	2904.45	2954.55
ENSMUSG00000025332	3021.48	2853.24	2845.13	2980.32	3091.93	2760.97
ENSMUSG00000022141	3019.72	2963.14	2990.53	2717.75	2942.35	2838.22
ENSMUSG00000040322	2971.3	2805.09	2800.67	2939.25	2862.44	3116.32
ENSMUSG00000078652	2808.43	2902.43	2876.62	2794.9	3057.1	3057.25
ENSMUSG00000013076	2833.08	2928.6	3074.81	2661.75	3104.22	2867.3
ENSMUSG00000032254	2915.83	3018.61	2976.64	2908.14	2769.21	2915.47
ENSMUSG00000063480	2867.41	2917.08	2848.83	3247.86	2777.41	2920.92
ENSMUSG00000038279	2975.7	2898.24	2793.26	3026.36	2990.5	2842.77
ENSMUSG00000024758	2933.44	2838.58	2841.42	2895.7	2852.2	3078.15
ENSMUSG00000032902	2941.37	3016.52	2940.52	2811.08	2842.98	2880.94
ENSMUSG00000013787	2819.87	3075.13	2922	2791.17	2911.62	2925.47
ENSMUSG00000019820	3027.64	2840.68	2915.52	2813.57	3062.22	2769.15
ENSMUSG00000025544	2951.93	2750.66	2984.98	2817.3	2873.71	3014.53
ENSMUSG00000033149	2958.09	2803	2865.5	2935.52	2946.45	2924.56
ENSMUSG00000020267	2929.04	2796.72	2871.06	3072.4	2725.16	3049.98
ENSMUSG00000027193	2907.91	2876.26	2861.8	2857.12	2887.03	3019.98
ENSMUSG00000032042	2859.49	2958.95	2809.94	2990.27	2955.67	2884.57
ENSMUSG00000025574	2851.57	3052.11	2686.76	3163.24	2837.85	2906.38
ENSMUSG00000062397	2926.4	2804.04	2834.94	2885.74	2862.44	3075.42
ENSMUSG00000034926	2893.83	2944.3	2903.48	2689.13	3105.25	2842.77
ENSMUSG00000021037	2896.47	2978.84	2742.33	3005.2	3003.82	2826.41
ENSMUSG00000002055	2836.6	2939.06	2872.91	2972.85	2995.63	2817.32
ENSMUSG00000007880	2891.18	3012.33	2980.35	2720.24	2950.55	2806.41
ENSMUSG00000020393	2789.06	2749.62	2891.44	2822.28	3060.17	3054.52
ENSMUSG00000031146	2954.57	2743.34	2861.8	2925.56	2911.62	2964.55
ENSMUSG00000039844	2911.43	2919.18	2874.77	2716.5	2889.08	3015.44
ENSMUSG00000017485	2837.48	2909.76	2827.53	2735.17	3038.66	2994.54
ENSMUSG00000019432	2784.66	2816.6	2842.35	2913.12	3030.46	2991.81
ENSMUSG00000003810	2929.04	2934.88	3007.2	2543.53	2890.1	2952.73
ENSMUSG00000000001	2892.94	2952.67	2959.05	2886.99	2906.5	2742.8
ENSMUSG00000001017	2966.02	2857.42	2868.28	2914.36	2912.64	2812.78
ENSMUSG00000052833	2900.87	2914.99	2825.68	3118.44	2761.02	2837.31
ENSMUSG00000033295	3059.34	2949.53	2989.61	2666.73	2789.7	2782.78
ENSMUSG00000030268	2790.82	2987.21	2871.06	2915.61	2875.76	2885.48
ENSMUSG00000028832	2889.42	2947.44	2874.77	2955.43	2876.78	2784.6
ENSMUSG00000038664	2807.55	2871.03	3001.65	2806.1	3027.39	2780.97
ENSMUSG00000028961	2900.87	3143.17	2971.08	2735.17	2717.99	2764.61
ENSMUSG00000025510	2929.92	3050.01	3052.59	2814.81	2696.47	2694.63
ENSMUSG00000058569	2883.26	2879.4	2715.47	3163.24	2796.87	2876.39
ENSMUSG00000039367	2812.83	2895.1	2813.64	2992.76	2909.57	2861.85
ENSMUSG00000027597	2851.57	2911.85	2932.19	2923.07	2883.96	2755.52
ENSMUSG00000021279	2884.14	3032.22	2919.22	2695.35	2871.66	2802.78
ENSMUSG00000044147	2725.67	2897.2	3010.91	2788.68	2828.63	2952.73
ENSMUSG00000024974	2738	2986.16	2809.01	2857.12	2960.79	2874.57
ENSMUSG00000057672	2907.91	2916.04	2866.43	2832.23	2926.99	2741.89
ENSMUSG00000024844	2837.48	2863.7	2762.7	3040.05	2871.66	2856.4
ENSMUSG00000021048	2827.8	2895.1	2884.03	2838.45	2852.2	2861.85
ENSMUSG00000022142	3043.49	2763.22	2865.5	2804.86	2895.23	2753.7
ENSMUSG00000027253	3054.94	2954.76	2950.71	2716.5	2772.29	2650.1
ENSMUSG00000026623	2958.97	2944.3	2983.12	2616.95	2814.29	2761.88
ENSMUSG00000059263	2762.65	2878.36	2870.13	2821.03	2924.94	2862.76
ENSMUSG00000026842	2846.28	2861.61	2953.49	2816.06	2789.7	2823.68
ENSMUSG00000005667	2741.52	2702.52	2875.69	2956.67	2893.18	2950.01
ENSMUSG00000002319	2807.55	2791.48	2835.87	2784.95	2960.79	2882.75
ENSMUSG00000060073	2770.57	2841.72	2746.03	3094.8	2899.32	2789.15
ENSMUSG00000058672	2794.34	2972.56	2836.79	2920.58	2820.44	2754.61
ENSMUSG00000037313	2719.51	3035.36	2720.1	2938.01	2870.64	2830.04
ENSMUSG00000022568	2821.63	2777.88	2888.66	2809.83	2899.32	2827.32
ENSMUSG00000059409	2768.81	2792.53	2825.68	2867.08	3027.39	2770.97
ENSMUSG00000028382	2952.81	2786.25	2845.13	2554.73	2926.99	2875.48
ENSMUSG00000078429	2857.73	2809.28	2798.82	2732.68	2964.89	2830.04
ENSMUSG00000030835	2888.54	2846.96	2643.23	2835.97	2788.68	2984.54
ENSMUSG00000030095	2735.36	2790.44	2771.04	2972.85	2854.25	2874.57
ENSMUSG00000038264	2847.16	2798.81	2671.94	2939.25	2905.47	2826.41
ENSMUSG00000024381	2725.67	2781.02	2644.15	2903.16	3007.92	2923.65
ENSMUSG00000041168	2923.76	2865.8	2727.51	2855.88	2796.87	2783.69
ENSMUSG00000059495	2896.47	2841.72	2847.91	2701.57	2963.87	2639.19
ENSMUSG00000024370	2844.52	2687.86	2927.56	2877.03	2833.76	2707.35
ENSMUSG00000025582	2898.23	2991.4	2921.07	2655.53	2856.3	2527.41
ENSMUSG00000041203	2874.46	2914.99	2629.34	2990.27	2754.87	2740.98
ENSMUSG00000020936	2729.19	2730.78	2770.11	2909.38	2831.71	2887.3
ENSMUSG00000055320	2764.41	2778.92	2759	2547.27	3004.85	2881.84
ENSMUSG00000028514	2863.89	2840.68	2900.7	2755.08	2804.05	2608.29
ENSMUSG00000037706	2748.56	2679.49	2719.17	2913.12	2828.63	2858.22
ENSMUSG00000033031	2694.86	2766.36	2771.96	2833.48	2791.75	2850.04
ENSMUSG00000052926	2713.35	2761.13	2652.49	2981.56	2791.75	2828.22
ENSMUSG00000020326	2753.84	2600.99	2819.2	2615.71	2782.53	3001.81
ENSMUSG00000055932	2769.69	2710.89	2847.91	2584.6	2814.29	2806.41
ENSMUSG00000024002	2765.29	2769.5	2755.29	2521.14	2808.14	2900.93
ENSMUSG00000021500	2657.88	2863.7	2774.74	2746.37	2758.97	2782.78
ENSMUSG00000025366	2746.8	2826.02	2659.9	2696.59	2811.22	2820.95
ENSMUSG00000032178	2776.73	2766.36	2805.3	2666.73	2683.16	2805.5
ENSMUSG00000061136	2837.48	2996.63	2695.09	2686.64	2693.4	2590.12
ENSMUSG00000026496	2713.35	2855.33	2789.56	2779.97	2739.5	2639.19
ENSMUSG00000024054	2824.27	2723.45	2901.62	2594.55	2725.16	2673.73
ENSMUSG00000049470	2937.84	2977.79	3014.61	2424.07	2495.67	2547.4
ENSMUSG00000026064	2891.18	2710.89	2927.56	2292.17	2740.53	2775.51
ENSMUSG00000024759	2782.9	2600.99	2840.5	2701.57	2743.6	2731.89
ENSMUSG00000056515	2775.85	2785.2	2897.92	2577.13	2694.42	2654.64
ENSMUSG00000021840	2787.3	2756.94	2725.66	2615.71	2704.67	2799.14
ENSMUSG00000038965	2747.68	2518.3	2641.38	2848.41	2845.03	2817.32
ENSMUSG00000011958	2754.72	2747.52	2696.02	2712.77	2610.42	2853.67
ENSMUSG00000031781	2739.76	2629.25	2619.15	3018.89	2755.89	2693.72
ENSMUSG00000020695	2605.06	2741.24	2791.41	2677.93	2880.88	2690.99
ENSMUSG00000040481	2765.29	2750.66	2733.99	2671.71	2815.32	2629.19
ENSMUSG00000030218	2576.01	2808.23	2888.66	2700.33	2699.55	2698.26
ENSMUSG00000029238	2892.06	2840.68	2940.52	2508.69	2520.26	2582.85
ENSMUSG00000061032	2624.43	2893.01	2683.98	2782.46	2679.06	2720.08
ENSMUSG00000031657	2682.53	2600.99	2590.44	2971.6	2712.87	2833.68
ENSMUSG00000035478	2707.18	2762.18	2533.94	2542.29	2995.63	2760.06
ENSMUSG00000063506	2675.49	2560.17	2663.6	2752.59	2819.41	2829.13
ENSMUSG00000000346	2829.56	2658.56	2796.04	2651.8	2534.6	2778.24
ENSMUSG00000058230	2746.8	2779.97	2763.63	2351.9	2707.74	2838.22
ENSMUSG00000031683	2625.31	2790.44	2639.52	2930.54	2686.23	2665.55
ENSMUSG00000021193	2799.62	2791.48	2628.41	2736.41	2704.67	2617.38
ENSMUSG00000020708	2680.77	2782.06	2685.83	2760.06	2697.5	2673.73
ENSMUSG00000018848	2731.83	2678.44	2714.54	2829.74	2665.74	2653.73
ENSMUSG00000032199	2627.95	2643.9	2755.29	2721.48	2702.62	2788.24
ENSMUSG00000062014	2793.46	2643.9	2623.78	2738.9	2690.33	2742.8
ENSMUSG00000067150	2758.25	2667.98	2691.39	2649.31	2652.42	2790.05
ENSMUSG00000095567	2540.79	2813.46	2615.44	2809.83	2734.38	2759.16
ENSMUSG00000063888	2539.03	2631.34	2533.02	2981.56	2884.98	2731.89
ENSMUSG00000009376	2600.66	2499.46	2709.91	2728.95	2850.15	2810.05
ENSMUSG00000063077	2716.87	2718.22	2776.59	2478.83	2853.22	2611.02
ENSMUSG00000032279	2714.23	2637.62	2726.58	2707.79	2579.68	2808.23
ENSMUSG00000031818	2674.61	2709.84	2517.27	2914.36	2740.53	2691.9
ENSMUSG00000050244	2717.75	2782.06	2733.06	2587.09	2624.76	2695.54
ENSMUSG00000031865	2664.93	2655.42	2572.84	2667.97	2822.49	2760.06
ENSMUSG00000027254	2722.15	2630.3	2777.52	2392.96	2829.66	2715.53
ENSMUSG00000024695	2744.16	2727.64	2658.05	2699.08	2561.24	2732.8
ENSMUSG00000038244	2630.59	2518.3	2652.49	2676.68	2911.62	2739.16
ENSMUSG00000028381	2551.36	2554.93	2446.88	2680.42	2840.93	3011.81
ENSMUSG00000018398	2631.47	2641.81	2580.25	2702.82	2724.14	2805.5
ENSMUSG00000038733	2636.75	2696.24	2724.73	2602.02	2736.43	2643.74
ENSMUSG00000032525	2747.68	2574.82	2678.42	2738.9	2667.79	2637.37
ENSMUSG00000028798	2495.01	2677.4	2601.55	2849.65	2656.52	2793.69
ENSMUSG00000021116	2782.9	2606.22	2622.85	2803.61	2523.33	2689.18
ENSMUSG00000027566	2626.19	2650.18	2560.8	2726.46	2728.23	2736.43
ENSMUSG00000021819	2616.5	2659.6	2664.53	2600.78	2845.03	2623.74
ENSMUSG00000024664	2546.95	2581.1	2615.44	2609.49	2818.39	2824.59
ENSMUSG00000027808	2749.44	2570.63	2683.05	2643.09	2651.4	2678.27
ENSMUSG00000031652	2630.59	2722.4	2767.33	2575.89	2661.64	2625.56
ENSMUSG00000028163	2752.08	2662.74	2716.39	2696.59	2627.83	2543.77
ENSMUSG00000004846	2628.83	2541.33	2583.95	2829.74	2695.45	2742.8
ENSMUSG00000028967	2791.7	2679.49	2733.06	2472.6	2516.16	2710.08
ENSMUSG00000097057	2770.57	2711.94	2665.46	2568.42	2587.88	2635.56
ENSMUSG00000027330	2714.23	2572.73	2743.25	2696.59	2668.81	2572.85
ENSMUSG00000020739	2551.36	2632.39	2595.07	2779.97	2755.89	2684.63
ENSMUSG00000025228	2530.23	2597.85	2628.41	2752.59	2656.52	2802.78
ENSMUSG00000022021	2700.14	2614.6	2707.13	2542.29	2605.29	2722.8
ENSMUSG00000021374	2836.6	2694.14	2722.88	2488.78	2626.81	2515.59
ENSMUSG00000043866	2576.01	2482.71	2651.56	2847.17	2603.24	2794.6
ENSMUSG00000052837	2694.86	2501.55	2669.16	2687.88	2746.67	2605.57
ENSMUSG00000024981	2673.73	2611.46	2537.65	2686.64	2710.82	2681
ENSMUSG00000032328	2673.73	2615.64	2668.23	2685.39	2639.1	2611.93
ENSMUSG00000021585	2612.1	2550.75	2788.63	2568.42	2711.84	2626.47
ENSMUSG00000022150	2716.87	2649.14	2671.94	2597.04	2633.98	2591.93
ENSMUSG00000014226	2591.85	2581.1	2588.59	2787.43	2687.25	2673.73
ENSMUSG00000025823	2576.89	2772.64	2570.99	2737.66	2671.89	2584.66
ENSMUSG00000028759	2624.43	2583.19	2671.01	2737.66	2542.8	2710.08
ENSMUSG00000057335	2551.36	2537.14	2678.42	2655.53	2697.5	2726.44
ENSMUSG00000029994	2581.29	2587.38	2569.14	2835.97	2756.92	2541.04
ENSMUSG00000004455	2611.22	2696.24	2653.42	2720.24	2556.12	2595.57
ENSMUSG00000042650	2718.63	2577.96	2602.48	2544.78	2697.5	2636.47
ENSMUSG00000027433	2576.89	2715.08	2675.64	2593.31	2661.64	2560.13
ENSMUSG00000035202	2335.66	2042.06	3081.3	2103.02	2304.09	3667.06
ENSMUSG00000027215	2568.08	2596.8	2557.1	2584.6	2738.48	2712.81
ENSMUSG00000030541	2655.24	2566.45	2554.32	2834.72	2640.13	2547.4
ENSMUSG00000032437	2711.59	2679.49	2544.13	2410.38	2758.97	2597.39
ENSMUSG00000039703	2653.48	2585.29	2595.99	2548.51	2727.21	2612.84
ENSMUSG00000031229	2714.23	2632.39	2595.07	2508.69	2728.23	2534.68
ENSMUSG00000020430	2497.65	2646	2566.36	2704.06	2726.18	2629.19
ENSMUSG00000021832	2597.14	2647.04	2526.53	2770.01	2537.68	2638.28
ENSMUSG00000017615	2546.07	2553.89	2584.88	2663	2641.15	2700.08
ENSMUSG00000019943	2569.84	2607.27	2714.54	2554.73	2653.44	2570.12
ENSMUSG00000031948	2645.56	2584.24	2672.87	2733.93	2555.09	2509.23
ENSMUSG00000009291	2618.26	2646	2608.96	2700.33	2639.1	2495.6
ENSMUSG00000028034	2707.18	2565.4	2509.86	2750.1	2683.16	2495.6
ENSMUSG00000033684	2600.66	2553.89	2588.59	2641.84	2655.49	2638.28
ENSMUSG00000038299	2556.64	2538.19	2547.83	2656.77	2693.4	2679.18
ENSMUSG00000001909	2636.75	2569.59	2646.01	2741.39	2504.89	2562.85
ENSMUSG00000032228	2648.2	2627.16	2718.25	2443.98	2502.84	2633.74
ENSMUSG00000078249	2694.86	2463.87	2547.83	2580.87	2701.6	2618.29
ENSMUSG00000022175	2694.86	2577.96	2526.53	2490.03	2637.05	2659.19
ENSMUSG00000024304	2597.14	2567.49	2684.91	2461.4	2657.54	2615.56
ENSMUSG00000059552	2662.28	2636.58	2520.05	2663	2502.84	2640.1
ENSMUSG00000019920	2754.72	2709.84	2690.46	2547.27	2358.39	2521.96
ENSMUSG00000012535	2583.93	2450.27	2579.32	2709.04	2575.58	2721.89
ENSMUSG00000017716	2602.42	2520.39	2486.71	2781.21	2590.95	2664.64
ENSMUSG00000022139	2640.27	2563.31	2475.6	2563.44	2677.01	2665.55
ENSMUSG00000000631	2676.37	2564.35	2685.83	2420.34	2524.36	2649.19
ENSMUSG00000029364	2572.48	2497.37	2531.16	2543.53	2759.99	2649.19
ENSMUSG00000026878	2658.76	2542.37	2514.49	2481.31	2657.54	2664.64
ENSMUSG00000031545	2642.92	2564.35	2436.7	2700.33	2668.81	2564.67
ENSMUSG00000030754	2501.17	2559.12	2487.64	2883.25	2473.13	2688.27
ENSMUSG00000019916	2547.83	2545.51	2600.63	2680.42	2614.51	2560.13
ENSMUSG00000022438	2648.2	2499.46	2606.18	2506.2	2662.67	2574.67
ENSMUSG00000020241	2472.12	2605.18	2572.84	2504.96	2691.35	2668.27
ENSMUSG00000029050	2688.7	2656.46	2928.48	2274.75	2403.47	2472.88
ENSMUSG00000002233	2490.61	2470.15	2624.71	2768.77	2568.41	2627.38
ENSMUSG00000019464	2670.21	2610.41	2545.98	2523.62	2588.9	2542.86
ENSMUSG00000025007	2600.66	2599.94	2421.88	2663	2636.03	2601.02
ENSMUSG00000096210	2508.22	2403.17	2352.42	2903.16	2695.45	2690.09
ENSMUSG00000018567	2496.77	2594.71	2564.51	2747.61	2575.58	2547.4
ENSMUSG00000028811	2449.23	2669.02	2571.91	2565.93	2630.91	2600.11
ENSMUSG00000055538	2608.58	2471.2	2634.89	2565.93	2590.95	2572.85
ENSMUSG00000060261	2535.51	2505.74	2581.18	2604.51	2599.15	2633.74
ENSMUSG00000031835	2612.98	2482.71	2503.38	2584.6	2712.87	2526.5
ENSMUSG00000027397	2635.87	2541.33	2552.47	2528.6	2649.35	2498.33
ENSMUSG00000037857	2566.32	2678.44	2729.36	2508.69	2468.01	2444.71
ENSMUSG00000066037	2685.17	2621.92	2415.4	2623.18	2522.31	2533.77
ENSMUSG00000028932	2578.65	2581.1	2483	2796.15	2442.4	2550.13
ENSMUSG00000037003	2553.12	2644.95	2638.6	2298.39	2563.29	2613.75
ENSMUSG00000079254	2526.7	2462.83	2558.02	2710.28	2560.22	2579.21
ENSMUSG00000027293	2588.33	2596.8	2533.02	2478.83	2628.86	2521.96
ENSMUSG00000051747	2616.5	2614.6	3031.28	2239.9	2689.3	2108.45
ENSMUSG00000063253	2526.7	2565.4	2420.03	2653.04	2695.45	2536.5
ENSMUSG00000015961	2488.85	2646	2622.85	2536.07	2513.09	2552.85
ENSMUSG00000021843	2517.02	2584.24	2621	2544.78	2526.41	2551.04
ENSMUSG00000039067	2539.91	2705.66	2512.64	2603.26	2392.2	2587.39
ENSMUSG00000002129	2596.26	2481.67	2480.23	2563.44	2611.44	2576.48
ENSMUSG00000041057	2655.24	2580.05	2514.49	2604.51	2452.64	2494.69
ENSMUSG00000021281	2570.72	2564.35	2597.85	2621.93	2557.14	2399.27
ENSMUSG00000027782	2549.59	2584.24	2512.64	2458.92	2595.05	2571.03
ENSMUSG00000028053	2583.05	2618.78	2669.16	2425.32	2575.58	2392.9
ENSMUSG00000029250	2568.96	2568.54	2451.52	2570.91	2585.83	2541.95
ENSMUSG00000074781	2449.23	2509.93	2508.01	2629.4	2639.1	2571.03
ENSMUSG00000039953	2554.88	2519.35	2436.7	2477.58	2655.49	2609.2
ENSMUSG00000031962	2336.54	2573.77	2597.85	2541.05	2539.73	2681.91
ENSMUSG00000003731	2548.71	2552.84	2521.9	2415.36	2599.15	2591.93
ENSMUSG00000032194	2577.77	2595.76	2571.91	2373.05	2585.83	2516.5
ENSMUSG00000047187	2439.55	2414.68	2631.19	2680.42	2564.31	2544.68
ENSMUSG00000034269	2546.07	2471.2	2452.44	2674.2	2619.64	2514.68
ENSMUSG00000032560	2562.8	2401.07	2501.53	2541.05	2693.4	2541.04
ENSMUSG00000031065	2437.79	2585.29	2604.33	2614.46	2562.26	2463.79
ENSMUSG00000020608	2676.37	2457.59	2538.57	2463.89	2471.08	2579.21
ENSMUSG00000022678	2475.64	2603.08	2463.56	2699.08	2613.49	2433.8
ENSMUSG00000067194	2477.4	2501.55	2578.4	2422.83	2527.43	2684.63
ENSMUSG00000029705	2568.08	2558.07	2721.95	2266.04	2555.09	2471.97
ENSMUSG00000003435	2507.34	2491.09	2453.37	2592.07	2650.37	2512.87
ENSMUSG00000076431	2656.12	2599.94	2591.36	2411.63	2423.96	2434.71
ENSMUSG00000030447	2554	2512.02	2534.87	2491.27	2455.72	2582.85
ENSMUSG00000052459	2522.3	2476.43	2612.67	2522.38	2538.7	2465.61
ENSMUSG00000039286	2498.53	2574.82	2595.07	2364.34	2586.85	2487.42
ENSMUSG00000041219	2646.44	2607.27	2459.85	2399.18	2488.5	2497.42
ENSMUSG00000035181	2486.21	2551.79	2540.43	2488.78	2616.56	2434.71
ENSMUSG00000031540	2467.72	2583.19	2652.49	2295.9	2555.09	2505.6
ENSMUSG00000015002	2653.48	2500.51	2565.43	2412.87	2396.3	2525.59
ENSMUSG00000030605	2550.48	2568.54	2498.75	2529.85	2463.91	2473.79
ENSMUSG00000001761	2622.67	2462.83	2508.94	2399.18	2516.16	2515.59
ENSMUSG00000034708	2468.6	2504.69	2407.99	2470.12	2501.82	2697.36
ENSMUSG00000052997	2444.83	2620.88	2647.86	2512.42	2398.35	2417.44
ENSMUSG00000041736	2481.81	2494.23	2426.51	2602.02	2493.62	2552.85
ENSMUSG00000037712	2467.72	2502.6	2470.96	2432.78	2453.67	2668.27
ENSMUSG00000036309	2506.46	2480.62	2336.67	2529.85	2547.92	2608.29
ENSMUSG00000016757	2658.76	2467.01	2443.18	2329.5	2507.97	2527.41
ENSMUSG00000042354	2521.42	2567.49	2467.26	2690.37	2330.73	2441.07
ENSMUSG00000040675	2490.61	2417.82	2523.76	2578.38	2580.71	2405.63
ENSMUSG00000039275	2575.13	2402.12	2458.92	2421.58	2596.07	2487.42
ENSMUSG00000029405	2506.46	2558.07	2578.4	2387.99	2483.38	2427.44
ENSMUSG00000043940	2653.48	2557.03	2528.39	2324.52	2557.14	2302.02
ENSMUSG00000024835	2538.15	2520.39	2458	2381.76	2469.04	2556.49
ENSMUSG00000031996	2442.19	2484.81	2428.36	2481.31	2585.83	2537.4
ENSMUSG00000020680	2500.29	2701.47	2369.09	2554.73	2414.74	2433.8
ENSMUSG00000027201	2507.34	2398.98	2493.19	2610.73	2471.08	2474.7
ENSMUSG00000064352	2408.73	2429.33	2559.87	2466.38	2456.74	2601.93
ENSMUSG00000032412	2598.9	2561.21	2400.58	2294.66	2486.45	2522.86
ENSMUSG00000025745	2383.2	2606.22	2469.11	2448.96	2502.84	2498.33
ENSMUSG00000032741	2495.89	2579.01	2369.09	2322.03	2665.74	2451.07
ENSMUSG00000027680	2600.66	2625.06	2472.82	2386.74	2441.37	2350.19
ENSMUSG00000002265	2383.2	2667.98	2629.34	2290.92	2576.61	2329.29
ENSMUSG00000005779	2460.68	2526.67	2408.91	2595.8	2476.21	2453.79
ENSMUSG00000024937	2318.93	2648.09	2295	2481.31	2469.04	2644.64
ENSMUSG00000013698	2564.56	2443.99	2571.91	2549.76	2285.65	2401.99
ENSMUSG00000037266	2382.32	2283.85	2333.89	2835.97	2591.98	2479.24
ENSMUSG00000036323	2474.76	2454.45	2495.04	2527.36	2529.48	2355.64
ENSMUSG00000003072	2502.05	2386.42	2471.89	2455.18	2523.33	2461.06
ENSMUSG00000061306	2414.02	2427.24	2519.12	2421.58	2532.55	2475.61
ENSMUSG00000039452	2450.11	2465.97	2423.73	2553.49	2435.23	2483.78
ENSMUSG00000025410	2315.41	2453.41	2403.36	2583.35	2541.77	2526.5
ENSMUSG00000036817	2394.65	2430.38	2433.92	2522.38	2359.41	2637.37
ENSMUSG00000034075	2523.18	2451.31	2429.29	2305.86	2442.4	2559.22
ENSMUSG00000026490	2499.41	2414.68	2430.21	2434.03	2541.77	2431.98
ENSMUSG00000026926	2465.96	2476.43	2448.74	2410.38	2497.72	2448.34
ENSMUSG00000038400	2419.3	2312.11	2286.66	2441.49	2605.29	2674.64
ENSMUSG00000028868	2452.75	2440.85	2588.59	2226.21	2434.2	2541.04
ENSMUSG00000033751	2375.28	2307.92	2533.94	2558.47	2435.23	2531.95
ENSMUSG00000026586	2454.51	2473.29	2422.8	2506.2	2490.55	2398.36
ENSMUSG00000024952	2498.53	2567.49	2362.61	2378.03	2461.86	2441.98
ENSMUSG00000027206	2412.25	2555.98	2367.24	2389.23	2539.73	2451.98
ENSMUSG00000025580	2465.08	2483.76	2411.69	2579.62	2394.25	2404.72
ENSMUSG00000020277	2430.74	2517.25	2418.17	2481.31	2332.78	2530.13
ENSMUSG00000005873	2363.83	2356.07	2398.73	2497.49	2504.89	2592.84
ENSMUSG00000028633	2428.1	2441.89	2442.25	2559.71	2470.06	2393.81
ENSMUSG00000024772	2470.36	2504.69	2554.32	2210.04	2343.02	2548.31
ENSMUSG00000041697	2387.6	2493.18	2447.81	2592.07	2441.37	2381.09
ENSMUSG00000024538	2363.83	2380.14	2445.03	2493.76	2502.84	2521.05
ENSMUSG00000039000	2422.82	2373.86	2486.71	2522.38	2394.25	2497.42
ENSMUSG00000022094	2414.9	2415.73	2469.11	2389.23	2504.89	2484.69
ENSMUSG00000020674	2383.2	2494.23	2577.47	2165.24	2524.36	2487.42
ENSMUSG00000028896	2421.06	2448.17	2496.9	2575.89	2344.05	2421.99
ENSMUSG00000029632	2373.52	2386.42	2497.82	2594.55	2398.35	2460.16
ENSMUSG00000031446	2525.82	2510.97	2448.74	2503.71	2357.37	2343.83
ENSMUSG00000031770	2533.75	2289.08	2345.01	2513.67	2554.07	2448.34
ENSMUSG00000031808	2543.43	2490.04	2395.02	2411.63	2479.28	2343.83
ENSMUSG00000024044	2458.03	2590.52	2370.94	2501.22	2366.59	2400.17
ENSMUSG00000028530	2461.56	2428.29	2395.95	2430.29	2459.82	2476.51
ENSMUSG00000021610	2411.37	2425.15	2553.39	2442.74	2422.93	2393.81
ENSMUSG00000069565	2461.56	2346.65	2346.86	2529.85	2457.77	2514.68
ENSMUSG00000022437	2414.02	2590.52	2403.36	2411.63	2437.28	2390.18
ENSMUSG00000039542	2424.58	2607.27	2504.31	2242.39	2431.13	2381.09
ENSMUSG00000001089	2475.64	2442.94	2537.65	2186.39	2428.06	2477.42
ENSMUSG00000030002	2392.01	2379.09	2450.59	2440.25	2447.52	2488.33
ENSMUSG00000022451	2513.5	2430.38	2407.99	2391.72	2364.54	2447.43
ENSMUSG00000035107	2465.08	2369.67	2515.42	2261.06	2476.21	2432.89
ENSMUSG00000020790	2460.68	2481.67	2430.21	2241.15	2451.62	2451.07
ENSMUSG00000030867	2525.82	2356.07	2385.76	2497.49	2299.99	2480.15
ENSMUSG00000021131	2406.97	2461.78	2395.95	2421.58	2419.86	2444.71
ENSMUSG00000003131	2446.59	2430.38	2351.49	2427.81	2410.64	2470.15
ENSMUSG00000026356	2420.18	2469.11	2282.03	2415.36	2454.69	2497.42
ENSMUSG00000014956	2616.5	2530.86	2487.64	2234.93	2298.97	2287.48
ENSMUSG00000020288	2406.97	2435.61	2294.07	2511.18	2413.71	2461.97
ENSMUSG00000026750	2416.66	2432.47	2428.36	2549.76	2327.66	2365.64
ENSMUSG00000030409	2409.61	2471.2	2574.69	2335.72	2343.02	2334.74
ENSMUSG00000041815	2371.76	2392.7	2572.84	2331.99	2477.23	2319.29
ENSMUSG00000009418	2368.24	2311.06	2463.56	2162.75	2563.29	2547.4
ENSMUSG00000040850	2421.94	2460.73	2528.39	2215.02	2395.27	2396.54
ENSMUSG00000050621	2464.2	2400.03	2324.63	2529.85	2384	2372
ENSMUSG00000031403	2330.38	2447.13	2518.2	2371.81	2371.71	2405.63
ENSMUSG00000030451	2486.21	2481.67	2492.27	2208.79	2460.84	2252.04
ENSMUSG00000030232	2323.34	2412.59	2456.15	2396.7	2417.81	2413.81
ENSMUSG00000030890	2360.31	2249.31	2441.33	2480.07	2407.57	2441.98
ENSMUSG00000000693	2305.73	2570.63	2352.42	2404.16	2432.15	2332.01
ENSMUSG00000036620	2291.64	2372.81	2445.03	2303.37	2497.72	2433.8
ENSMUSG00000033184	2405.21	2501.55	2296.85	2351.9	2384	2409.26
ENSMUSG00000025085	2509.1	2367.58	2320	2330.74	2418.84	2372.91
ENSMUSG00000054008	2475.64	2342.46	2330.19	2365.59	2463.91	2351.1
ENSMUSG00000022201	2434.26	2447.13	2432.99	2261.06	2378.88	2351.1
ENSMUSG00000028412	2443.95	2352.93	2324.63	2359.36	2388.1	2438.34
ENSMUSG00000000278	2412.25	2412.59	2363.53	2458.92	2304.09	2368.37
ENSMUSG00000094410	2473.88	2389.56	2455.22	2371.81	2503.87	2113.9
ENSMUSG00000032867	2421.94	2410.49	2395.95	2359.36	2465.96	2246.58
ENSMUSG00000022994	2352.39	2375.95	2382.98	2435.27	2458.79	2311.11
ENSMUSG00000007458	2331.26	2416.77	2354.27	2590.82	2270.28	2373.82
ENSMUSG00000031400	2400.81	2398.98	2349.64	2402.92	2375.81	2361.1
ENSMUSG00000032531	2377.92	2203.25	2398.73	2370.56	2403.47	2471.06
ENSMUSG00000024811	2482.69	2431.43	2432.07	2251.1	2368.63	2243.86
ENSMUSG00000025068	2465.96	2195.93	2354.27	2312.08	2473.13	2389.27
ENSMUSG00000017548	2539.91	2463.87	2341.3	2387.99	2274.38	2207.51
ENSMUSG00000074886	2388.48	2344.55	2381.13	2278.48	2431.13	2361.1
ENSMUSG00000038095	2386.72	2331.99	2407.06	2243.64	2416.79	2385.63
ENSMUSG00000001288	2455.39	2445.03	2344.08	2202.57	2386.05	2328.38
ENSMUSG00000071054	2334.78	2619.83	2366.31	2334.48	2304.09	2247.49
ENSMUSG00000018677	2368.24	2345.6	2278.33	2322.03	2397.32	2460.16
ENSMUSG00000024908	2476.52	2325.71	2187.56	2297.14	2471.08	2398.36
ENSMUSG00000025156	2308.37	2277.57	2339.45	2502.47	2405.52	2368.37
ENSMUSG00000023008	2247.62	2386.42	2384.83	2249.86	2512.06	2380.18
ENSMUSG00000025224	2323.34	2349.79	2294.07	2387.99	2486.45	2341.1
ENSMUSG00000052957	2455.39	2250.35	2532.09	2236.17	2307.17	2318.38
ENSMUSG00000030774	2419.3	2416.77	2370.94	2290.92	2346.1	2292.93
ENSMUSG00000049327	2701.9	2617.74	2616.37	2029.6	2003.91	2079.36
ENSMUSG00000036499	2383.2	2379.09	2388.54	2354.39	2310.24	2329.29
ENSMUSG00000020097	2467.72	2274.43	2341.3	2295.9	2314.34	2417.44
ENSMUSG00000031563	2453.63	2286.99	2358.9	2222.48	2443.42	2337.47
ENSMUSG00000020994	2271.39	2519.35	2220.9	2475.09	2411.66	2298.39
ENSMUSG00000022390	2466.84	2325.71	2300.55	2191.37	2414.74	2389.27
ENSMUSG00000022636	2318.05	2296.41	2385.76	2472.6	2400.39	2263.85
ENSMUSG00000040761	2358.55	2457.59	2451.52	2126.66	2429.08	2242.95
ENSMUSG00000025369	2239.7	2483.76	2372.79	2282.21	2421.91	2312.02
ENSMUSG00000028249	2541.67	2532.95	2445.96	2177.68	2160.66	2193.87
ENSMUSG00000033444	2245.86	2452.36	2360.75	2266.04	2379.9	2389.27
ENSMUSG00000014959	2315.41	2162.43	2400.58	2380.52	2415.76	2406.54
ENSMUSG00000026393	2521.42	2314.2	2306.11	2322.03	2262.09	2331.1
ENSMUSG00000001472	2289.88	2294.31	2361.68	2341.94	2375.81	2402.9
ENSMUSG00000028330	2362.95	2230.47	2318.15	2322.03	2348.14	2450.16
ENSMUSG00000039640	2267.87	2239.89	2423.73	2401.67	2307.17	2405.63
ENSMUSG00000097347	2458.92	2331.99	2330.19	2267.28	2262.09	2337.47
ENSMUSG00000074698	2348.87	2349.79	2355.2	2366.83	2296.92	2299.3
ENSMUSG00000027804	2273.15	2318.39	2377.42	2460.16	2303.07	2306.57
ENSMUSG00000055024	2412.25	2258.73	2379.28	2079.38	2391.17	2401.08
ENSMUSG00000024583	2333.02	2393.75	2258.88	2486.29	2273.36	2290.21
ENSMUSG00000034361	2325.1	2348.74	2333.89	2324.52	2329.7	2327.47
ENSMUSG00000025786	2411.37	2283.85	2321.85	2249.86	2343.02	2335.65
ENSMUSG00000020256	2221.21	2226.28	2362.61	2415.36	2433.18	2341.1
ENSMUSG00000028693	2291.64	2296.41	2410.76	2279.72	2353.27	2328.38
ENSMUSG00000028068	2376.16	2243.03	2390.39	2268.52	2329.7	2334.74
ENSMUSG00000036686	2355.91	2337.23	2321.85	2155.28	2448.55	2298.39
ENSMUSG00000056608	2385.84	2321.53	2391.32	2292.17	2209.84	2322.02
ENSMUSG00000032737	2361.19	2352.93	2282.03	2343.19	2312.29	2293.84
ENSMUSG00000048285	2458.92	2329.9	2273.69	2203.82	2354.29	2267.49
ENSMUSG00000029547	2369.12	2353.97	2490.41	2069.42	2361.46	2212.05
ENSMUSG00000005981	2339.18	2290.13	2374.65	2310.83	2347.12	2239.31
ENSMUSG00000030298	2222.09	2286.99	2266.29	2348.16	2349.17	2439.25
ENSMUSG00000085208	2266.99	2316.29	2365.38	2307.1	2370.68	2277.48
ENSMUSG00000004364	2361.19	2225.23	2382.98	2228.7	2373.76	2293.84
ENSMUSG00000030138	2340.06	2405.26	2281.1	2167.73	2387.08	2287.48
ENSMUSG00000037103	2205.36	2391.65	2362.61	2287.19	2325.61	2324.74
ENSMUSG00000052911	2217.69	2311.06	2327.41	2565.93	2306.14	2225.68
ENSMUSG00000006442	2226.49	2203.25	2354.27	2370.56	2359.41	2361.1
ENSMUSG00000055531	2305.73	2351.88	2274.62	2307.1	2262.09	2327.47
ENSMUSG00000035131	2376.16	2291.17	2261.66	2297.14	2366.59	2209.32
ENSMUSG00000000561	2327.74	2256.63	2297.77	2303.37	2264.14	2338.37
ENSMUSG00000027230	2274.03	2214.77	2321.85	2167.73	2368.63	2408.35
ENSMUSG00000027852	2197.44	2172.9	2312.59	2368.08	2421.91	2334.74
ENSMUSG00000007888	2264.35	2321.53	2330.19	2206.3	2237.5	2401.08
ENSMUSG00000060803	2235.3	2329.9	2245.91	2237.41	2318.43	2404.72
ENSMUSG00000021488	2340.94	2252.45	2432.99	2103.02	2336.88	2254.76
ENSMUSG00000035295	2349.75	2195.93	2221.83	2574.64	2126.85	2338.37
ENSMUSG00000032612	2346.23	2274.43	2288.51	2198.84	2365.56	2269.31
ENSMUSG00000079111	2232.66	2273.38	2194.97	2365.59	2304.09	2401.99
ENSMUSG00000027365	2344.47	2251.4	2309.81	2323.28	2344.05	2185.69
ENSMUSG00000005802	2286.36	2306.87	2369.09	2119.2	2330.73	2274.76
ENSMUSG00000039852	2260.83	2279.66	2386.69	2007.2	2358.39	2362.91
ENSMUSG00000039105	2422.82	2542.37	2340.38	2185.15	2086.9	2115.72
ENSMUSG00000020044	2180.71	2096.49	2136.62	2517.4	2371.71	2452.89
ENSMUSG00000059355	2243.22	2329.9	2131.07	2338.21	2310.24	2365.64
ENSMUSG00000022895	2216.81	2266.05	2290.37	2228.7	2177.05	2487.42
ENSMUSG00000021171	2331.26	2317.34	2237.58	2124.17	2365.56	2278.39
ENSMUSG00000050390	2327.74	2377	2245.91	2003.47	2351.22	2317.47
ENSMUSG00000095115	2343.58	2329.9	2248.69	2275.99	2279.5	2199.33
ENSMUSG00000022263	2463.32	2243.03	2471.89	1896.45	2306.14	2182.97
ENSMUSG00000019558	2322.46	2374.91	2337.6	2201.33	2223.16	2193.87
ENSMUSG00000031441	2299.57	2341.41	2324.63	2149.06	2353.27	2176.61
ENSMUSG00000053841	2244.98	2345.6	2208.86	2242.39	2273.36	2332.01
ENSMUSG00000030654	2329.5	2334.09	2161.63	2154.04	2218.03	2412.9
ENSMUSG00000026596	2329.5	2321.53	2302.41	2152.8	2241.6	2254.76
ENSMUSG00000039361	2457.15	2342.46	2474.67	2070.67	2094.07	2124.8
ENSMUSG00000002365	2263.47	2334.09	2196.82	2168.97	2343.02	2308.38
ENSMUSG00000034659	2218.57	2352.93	2235.72	2243.64	2231.35	2342.92
ENSMUSG00000022962	2297.8	2255.59	2199.6	2330.74	2294.87	2260.22
ENSMUSG00000019777	2121.73	2379.09	2145.89	2405.41	2270.28	2340.19
ENSMUSG00000008730	2353.27	2352.93	2396.87	2020.89	2185.25	2230.23
ENSMUSG00000010755	2274.91	2346.65	2239.43	2258.57	2122.76	2348.37
ENSMUSG00000050812	2245.86	2331.99	2354.27	2079.38	2296.92	2242.95
ENSMUSG00000024120	2184.24	2363.39	2331.12	2099.29	2276.43	2289.3
ENSMUSG00000023067	2197.44	2223.14	2299.63	2247.37	2233.4	2353.82
ENSMUSG00000022587	2274.91	2087.07	2278.33	2340.7	2262.09	2312.93
ENSMUSG00000024294	2274.03	2342.46	2308.89	1897.7	2317.41	2312.02
ENSMUSG00000020687	2333.9	2232.56	2389.46	2182.66	2200.62	2160.25
ENSMUSG00000083833	2187.76	2187.55	2255.17	2329.5	2352.24	2232.04
ENSMUSG00000026867	2124.37	2346.65	2209.79	2320.79	2234.43	2307.48
ENSMUSG00000028478	2220.33	2249.31	2316.3	2259.81	2247.74	2217.5
ENSMUSG00000024026	2181.59	2252.45	2349.64	2197.59	2227.25	2262.94
ENSMUSG00000047888	2432.5	2297.45	2377.42	1895.21	2199.59	2182.06
ENSMUSG00000052681	2377.92	2182.32	2295.92	2325.77	2159.64	2120.26
ENSMUSG00000006057	2241.46	2179.18	2284.81	2399.18	2157.59	2217.5
ENSMUSG00000024083	2198.32	2235.7	2252.39	2293.41	2255.94	2223.86
ENSMUSG00000031660	2211.53	2357.11	2116.25	2298.39	2261.06	2224.77
ENSMUSG00000026457	2311.89	2218.95	2212.57	2216.26	2228.28	2233.86
ENSMUSG00000043067	2277.56	2258.73	2277.4	2117.95	2172.96	2268.4
ENSMUSG00000034022	2181.59	2288.03	2200.53	2242.39	2197.54	2301.11
ENSMUSG00000075470	2335.66	2227.33	2286.66	2060.71	2230.33	2211.14
ENSMUSG00000071659	2221.21	2282.8	2254.25	2320.79	2281.55	2071.18
ENSMUSG00000024498	2156.94	2252.45	2138.48	2282.21	2272.33	2311.11
ENSMUSG00000004535	2380.56	2218.95	2251.47	2254.84	2092.02	2177.52
ENSMUSG00000033813	2231.78	2374.91	2227.39	2122.93	2114.56	2292.93
ENSMUSG00000037725	2082.99	2144.64	2342.23	2300.88	2246.72	2280.21
ENSMUSG00000049866	2313.65	2211.63	2208.86	2215.02	2189.35	2225.68
ENSMUSG00000020167	2262.59	2340.37	2332.04	2095.55	2254.92	2073
ENSMUSG00000031246	2222.97	2150.92	2131.99	2335.72	2215.98	2325.65
ENSMUSG00000046711	2244.98	2409.45	2146.81	2211.28	2146.32	2215.69
ENSMUSG00000004677	2282.84	2231.51	2225.54	2162.75	2146.32	2283.85
ENSMUSG00000070327	2282.84	2258.73	2302.41	2090.58	2313.31	2089.36
ENSMUSG00000025968	2236.18	2220	2282.03	2303.37	2190.37	2128.44
ENSMUSG00000027331	2148.14	2224.19	2329.26	2191.37	2284.63	2163.88
ENSMUSG00000020483	2264.35	2303.73	2113.47	2336.97	2146.32	2197.51
ENSMUSG00000032185	2186.88	2190.69	2359.83	2042.04	2306.14	2195.69
ENSMUSG00000029686	2244.1	2369.67	2192.19	2237.41	2078.7	2201.14
ENSMUSG00000055491	2117.33	2271.29	2202.38	2144.08	2361.46	2221.14
ENSMUSG00000002107	2312.77	2000.2	2445.96	2070.67	2187.3	2216.59
ENSMUSG00000021709	2322.46	2161.38	2238.5	2119.2	2215.98	2204.78
ENSMUSG00000008892	2229.13	2181.27	2169.04	2242.39	2115.58	2350.19
ENSMUSG00000034317	2128.77	2245.12	2149.59	2236.17	2175.01	2365.64
ENSMUSG00000025402	2286.36	2182.32	2143.11	2280.97	2210.86	2195.69
ENSMUSG00000021929	2250.26	2250.35	2222.76	2154.04	2135.05	2244.77
ENSMUSG00000026622	2206.24	2176.04	2184.78	2364.34	2125.83	2245.68
ENSMUSG00000031561	2382.32	2315.25	2366.31	2044.53	2091	2027.56
ENSMUSG00000024691	2243.22	2225.23	2295	2152.8	2173.98	2163.88
ENSMUSG00000060802	2112.92	2145.68	2230.17	2414.12	2184.23	2226.59
ENSMUSG00000027447	2266.11	2122.66	2168.11	2437.76	2149.39	2155.7
ENSMUSG00000037012	2088.27	2341.41	2278.33	2259.81	2238.52	2086.63
ENSMUSG00000027962	2279.32	2139.4	2221.83	2144.08	2158.61	2245.68
ENSMUSG00000030216	2253.79	2211.63	2188.49	2127.91	2180.13	2223.86
ENSMUSG00000017760	2286.36	2170.8	2148.66	2227.46	2191.4	2172.06
ENSMUSG00000030127	2175.43	2186.5	2238.5	2212.53	2217.01	2164.79
ENSMUSG00000028937	2230.9	2211.63	2035.67	2312.08	2187.3	2229.32
ENSMUSG00000042626	2246.74	2245.12	2310.74	2040.8	2159.64	2127.53
ENSMUSG00000027012	2173.67	2241.98	2168.11	2244.88	2209.84	2151.16
ENSMUSG00000016541	2211.53	2245.12	2096.8	2126.66	2157.59	2308.38
ENSMUSG00000089774	2083.87	2147.78	2236.65	2109.24	2318.43	2256.58
ENSMUSG00000034021	2259.95	2248.26	2273.69	1998.49	2197.54	2135.71
ENSMUSG00000004849	2112.92	2248.26	2052.35	2248.61	2336.88	2194.78
ENSMUSG00000026775	2161.35	2234.65	2209.79	2115.46	2178.08	2238.41
ENSMUSG00000030759	2206.24	2120.56	2201.46	2232.44	2322.53	2077.55
ENSMUSG00000026335	2230.02	2057.76	2282.03	2200.08	2118.66	2226.59
ENSMUSG00000001783	2164.87	2317.34	2034.75	2121.69	2208.81	2271.12
ENSMUSG00000001627	2178.95	2190.69	2173.67	2353.14	2161.69	2099.36
ENSMUSG00000042029	2244.1	2288.03	2176.45	2070.67	2142.22	2167.52
ENSMUSG00000032777	2222.97	2162.43	2098.65	2191.37	2210.86	2220.23
ENSMUSG00000034781	2178.07	2145.68	2228.31	2048.27	2263.11	2212.05
ENSMUSG00000048537	2260.83	2124.75	2253.32	2068.18	2244.67	2105.72
ENSMUSG00000057561	2136.69	2144.64	2114.4	2269.77	2130.95	2299.3
ENSMUSG00000020142	2128.77	2155.1	2084.76	2224.97	2318.43	2186.6
ENSMUSG00000032301	2129.65	2253.49	2107.91	2325.77	2118.66	2176.61
ENSMUSG00000013593	2077.71	2226.28	2155.15	2285.95	2169.88	2188.42
ENSMUSG00000034297	2271.39	2263.96	2158.85	2042.04	2205.74	2093
ENSMUSG00000021413	2148.14	2205.35	2307.04	2139.11	2131.98	2105.72
ENSMUSG00000019428	2179.83	2177.08	2110.69	2224.97	2115.58	2241.13
ENSMUSG00000017428	2224.73	2118.47	2163.48	2068.18	2204.72	2229.32
ENSMUSG00000039234	2151.66	2091.26	2133.85	2147.82	2245.7	2242.04
ENSMUSG00000024795	2299.57	2205.35	2157	2159.02	2155.54	2033.01
ENSMUSG00000008604	2094.44	2161.38	2171.82	2154.04	2108.41	2302.93
ENSMUSG00000027881	2069.79	2300.59	2207.94	2195.1	2111.49	2124.8
ENSMUSG00000048279	2276.68	2072.42	2192.19	1971.11	2200.62	2192.96
ENSMUSG00000025047	2126.13	2151.96	2158.85	2137.86	2130.95	2246.58
ENSMUSG00000018846	2333.9	2192.78	2370.01	2020.89	1886.1	2091.18
ENSMUSG00000062929	2213.29	2181.27	2187.56	2101.78	2160.66	2089.36
ENSMUSG00000004562	2217.69	2163.48	2128.29	2116.71	2088.95	2201.14
ENSMUSG00000045039	2132.29	2148.82	2169.04	2048.27	2209.84	2202.96
ENSMUSG00000054611	2272.27	2187.55	2332.97	2012.18	2137.1	1953.04
ENSMUSG00000018217	2177.19	2167.66	2202.38	2208.79	2082.8	2089.36
ENSMUSG00000027282	2069.79	2074.51	2123.66	2241.15	2219.06	2207.51
ENSMUSG00000040842	2253.79	2182.32	2026.41	2043.29	2175.01	2201.14
ENSMUSG00000029144	2134.93	2165.57	2164.41	2188.88	2141.2	2126.62
ENSMUSG00000063856	2163.11	2101.72	2153.3	2185.15	2083.82	2212.96
ENSMUSG00000070544	2178.95	2151.96	2144.96	2122.93	2129.93	2154.79
ENSMUSG00000020664	2151.66	2116.38	2203.31	2279.72	2032.6	2121.17
ENSMUSG00000024091	2141.98	2142.54	2243.13	2089.33	2161.69	2084.82
ENSMUSG00000053293	2149.02	2213.72	2191.27	1861.61	2200.62	2187.51
ENSMUSG00000022100	2117.33	2098.58	2341.3	2013.42	2074.6	2169.34
ENSMUSG00000024960	2127.89	2250.35	2157	2203.82	2149.39	1996.66
ENSMUSG00000056050	2007.28	2146.73	2154.22	2125.42	2194.47	2230.23
ENSMUSG00000019433	2158.7	2172.9	2082.91	2076.89	2147.34	2183.88
ENSMUSG00000061950	2085.63	2178.13	2131.07	2027.11	2320.48	2076.64
ENSMUSG00000029202	2220.33	2113.24	2299.63	1862.85	2123.78	2120.26
ENSMUSG00000064127	2338.3	2214.77	2336.67	1884.01	2018.26	1952.13
ENSMUSG00000029177	2115.57	2020.08	2239.43	2241.15	2048.99	2156.61
ENSMUSG00000018160	2205.36	2145.68	2212.57	2050.76	2178.08	1995.75
ENSMUSG00000010205	2181.59	1998.1	2175.52	2009.69	2166.81	2203.87
ENSMUSG00000060671	2090.91	2098.58	2214.42	1978.58	2160.66	2198.42
ENSMUSG00000041763	2198.32	2136.26	2138.48	2162.75	2004.94	2132.07
ENSMUSG00000029076	2085.63	2166.62	2072.72	2241.15	2151.44	2091.18
ENSMUSG00000034243	2184.24	2151.96	2213.5	2068.18	2142.22	1989.39
ENSMUSG00000036333	2156.06	2080.79	2100.51	2112.97	2223.16	2084.82
ENSMUSG00000017400	2180.71	2215.81	2030.12	1865.34	2196.52	2215.69
ENSMUSG00000022789	2172.79	2134.17	2059.75	2033.33	2176.03	2161.16
ENSMUSG00000000420	2116.45	2188.6	2088.47	2073.15	2124.8	2160.25
ENSMUSG00000022351	2143.74	2014.85	2138.48	2267.28	2056.16	2151.16
ENSMUSG00000021890	2171.91	2173.94	2113.47	2114.22	2061.29	2113.9
ENSMUSG00000053838	2098.84	2179.18	2067.16	2095.55	2153.49	2142.98
ENSMUSG00000005442	2097.96	2125.8	2103.28	2034.58	2123.78	2220.23
ENSMUSG00000015087	2184.24	2220	2112.55	2042.04	2144.27	2015.75
ENSMUSG00000038324	2141.98	2093.35	2066.24	2206.3	2072.56	2154.79
ENSMUSG00000024870	2077.71	2036.83	2020.86	2273.5	2143.25	2191.15
ENSMUSG00000024165	2244.98	2347.69	2316.3	1842.94	2031.58	1865.79
ENSMUSG00000052752	2021.36	2166.62	2205.16	2156.53	2057.19	2104.81
ENSMUSG00000003038	2073.31	2243.03	2126.44	2192.62	2016.21	2056.64
ENSMUSG00000006360	2084.75	2124.75	2072.72	2181.42	2040.8	2185.69
ENSMUSG00000021760	2162.23	2057.76	1998.63	2335.72	2057.19	2101.17
ENSMUSG00000056692	2062.74	2123.7	2069.02	2145.33	2134.03	2145.71
ENSMUSG00000053754	2134.05	2187.55	2154.22	2090.58	2072.56	2027.56
ENSMUSG00000028962	2088.27	2122.66	2094.95	2154.04	2141.2	2081.18
ENSMUSG00000042719	2138.46	2055.67	2157	2024.62	2154.52	2107.54
ENSMUSG00000020198	2235.3	2226.28	2222.76	2073.15	1915.81	1963.04
ENSMUSG00000046865	2181.59	2150.92	2007.89	2135.37	2005.96	2165.7
ENSMUSG00000059119	2152.54	2139.4	2094.02	2187.64	2072.56	2007.57
ENSMUSG00000029004	2167.51	2142.54	2144.03	1996	2058.21	2088.45
ENSMUSG00000024163	2090.91	2150.92	2081.98	2068.18	2138.12	2093.9
ENSMUSG00000041720	2082.11	2000.2	2106.06	2129.15	2105.34	2178.42
ENSMUSG00000005514	2054.82	2001.24	2113.47	2076.89	2241.6	2112.08
ENSMUSG00000013663	2148.14	2092.3	2141.26	1747.12	2199.59	2182.97
ENSMUSG00000037411	2135.81	2049.39	2096.8	2211.28	1999.82	2108.45
ENSMUSG00000020863	2040.73	2034.74	2070.87	2456.43	2059.24	2005.75
ENSMUSG00000031783	2075.95	2013.8	2069.02	2173.95	2060.26	2192.96
ENSMUSG00000022607	2103.24	2057.76	2038.45	2132.89	2061.29	2184.79
ENSMUSG00000027406	2090.03	2112.19	2106.06	2137.86	2067.43	2074.82
ENSMUSG00000001403	2192.16	2235.7	2029.19	2172.71	2015.18	1953.04
ENSMUSG00000024953	2052.18	2228.37	1923.61	1997.25	2124.8	2222.05
ENSMUSG00000030824	2094.44	2166.62	2064.39	2083.11	2050.02	2092.09
ENSMUSG00000056999	2094.44	2150.92	2194.05	1830.5	2117.63	2093.9
ENSMUSG00000049553	2081.23	2096.49	2086.61	2078.13	2128.9	2066.64
ENSMUSG00000015671	2025.77	2103.82	2023.63	2279.72	2072.56	2080.27
ENSMUSG00000033009	2080.35	2039.97	2014.37	2137.86	2121.73	2140.25
ENSMUSG00000069662	2111.16	2056.72	2075.5	2052	2074.6	2127.53
ENSMUSG00000026353	2034.57	2087.07	2004.19	2104.26	2094.07	2165.7
ENSMUSG00000036564	1986.15	2102.77	2088.47	2116.71	2158.61	2052.1
ENSMUSG00000000171	2016.08	2035.78	2043.08	2210.04	1982.4	2209.32
ENSMUSG00000034158	2108.52	2066.14	2076.43	1684.9	2209.84	2232.95
ENSMUSG00000076441	2075.95	2192.78	2234.8	1964.89	1945.52	2029.38
ENSMUSG00000022098	2044.25	2064.04	2080.13	2023.38	2098.17	2145.71
ENSMUSG00000016619	1972.94	2195.93	2011.59	2086.84	2145.29	2076.64
ENSMUSG00000005625	2035.45	2132.08	2063.46	2115.46	2088.95	2032.11
ENSMUSG00000005150	2058.34	2133.12	2042.16	2190.13	2051.04	2006.66
ENSMUSG00000047879	2170.15	2101.72	2170.89	2013.42	2036.7	1933.95
ENSMUSG00000039536	2068.02	2078.7	2065.31	2120.44	2043.87	2073
ENSMUSG00000029191	2065.38	2128.94	1993.07	1988.54	2144.27	2105.72
ENSMUSG00000069744	2082.11	2112.19	1985.66	2203.82	1979.33	2094.81
ENSMUSG00000008976	2056.58	2037.88	2109.77	2025.87	2211.89	1984.85
ENSMUSG00000023050	2155.18	1962.52	2008.82	2124.17	2052.07	2107.54
ENSMUSG00000025255	2117.33	2053.58	2205.16	1895.21	2120.71	1972.12
ENSMUSG00000028678	2028.41	2080.79	2137.55	2048.27	2121.73	1993.93
ENSMUSG00000020720	2068.02	2010.66	2057.9	2112.97	2079.73	2077.55
ENSMUSG00000025134	2018.72	2095.44	2003.26	2150.31	2077.68	2079.36
ENSMUSG00000009035	2067.14	2183.36	1961.58	1971.11	2087.92	2113.9
ENSMUSG00000034707	2020.48	2023.22	2158.85	1901.43	2155.54	2091.18
ENSMUSG00000025764	2054.82	2005.43	2103.28	2010.93	2118.66	2073
ENSMUSG00000025246	1960.62	2069.28	2098.65	1961.16	2116.61	2154.79
ENSMUSG00000042410	2122.61	2160.34	2018.08	1957.43	2078.7	2023.02
ENSMUSG00000044447	2183.35	2001.24	2037.53	1967.38	2118.66	2034.83
ENSMUSG00000038766	2039.85	2131.03	2138.48	2061.95	2052.07	1960.31
ENSMUSG00000004865	2098.84	1972.98	2122.73	2017.16	1968.06	2152.07
ENSMUSG00000022016	2108.52	2027.41	2124.59	1893.96	2039.77	2115.72
ENSMUSG00000021144	2108.52	2126.84	1962.51	1872.81	2126.85	2122.99
ENSMUSG00000027496	2140.22	2077.65	1927.32	2089.33	2080.75	2047.55
ENSMUSG00000004317	2130.53	2161.38	2148.66	1877.79	1926.05	2058.46
ENSMUSG00000014769	2008.16	2004.38	1940.28	2307.1	2059.24	2083
ENSMUSG00000025935	2161.35	2042.06	2043.08	1850.41	2044.89	2126.62
ENSMUSG00000029516	2160.46	2087.07	2032.9	1967.38	2015.18	2032.11
ENSMUSG00000031490	2033.69	1891.34	2112.55	2130.4	2040.8	2102.99
ENSMUSG00000028207	2007.28	2080.79	2076.43	2058.22	1955.76	2125.71
ENSMUSG00000034109	2087.39	2047.3	2092.17	2007.2	2076.65	1964.85
ENSMUSG00000022353	2067.14	2017.99	2010.67	1915.12	2117.63	2119.35
ENSMUSG00000026663	2185.12	2080.79	2202.38	1836.72	2053.09	1858.52
ENSMUSG00000038708	2091.79	2113.24	2027.34	2100.53	2033.62	1917.59
ENSMUSG00000023110	2028.41	2071.37	1992.15	2071.91	2008.01	2095.72
ENSMUSG00000029344	2123.49	2053.58	2006.04	2091.82	2071.53	1927.59
ENSMUSG00000043535	2161.35	2097.54	2021.78	1910.14	2044.89	1985.76
ENSMUSG00000031314	2060.98	2089.16	2031.97	1881.52	2146.32	2008.48
ENSMUSG00000020321	1933.33	2089.16	1966.21	2218.75	2026.45	2063
ENSMUSG00000040212	1952.69	2187.55	2012.52	2028.36	2021.33	2055.73
ENSMUSG00000002835	2082.11	2108	2034.75	1931.29	1996.74	2055.73
ENSMUSG00000014313	2017.84	2123.7	1983.81	2155.28	2040.8	1954.86
ENSMUSG00000028577	2084.75	2142.54	2045.86	1917.61	2085.87	1942.13
ENSMUSG00000059775	2082.99	2206.39	1831	2264.79	1906.59	2003.93
ENSMUSG00000001380	2043.37	2076.6	1920.83	2186.39	1976.25	2052.1
ENSMUSG00000020780	2020.48	2149.87	2027.34	2083.11	1935.27	2017.56
ENSMUSG00000060279	2012.56	2049.39	2026.41	1973.6	2045.92	2093
ENSMUSG00000037270	2128.77	2101.72	2006.96	1823.03	2123.78	1977.58
ENSMUSG00000091896	2110.28	2005.43	2014.37	2022.13	2003.91	2023.02
ENSMUSG00000023932	2021.36	2044.16	2032.9	2032.09	1974.2	2073.91
ENSMUSG00000036591	2049.54	1999.15	2119.03	1875.3	2081.78	2013.93
ENSMUSG00000029104	1979.99	2012.76	2081.06	2116.71	2066.41	1943.95
ENSMUSG00000044627	2025.77	1926.93	1955.1	2105.51	2133	2041.19
ENSMUSG00000063015	2066.26	1969.84	2085.69	1951.2	1922.98	2125.71
ENSMUSG00000017707	2036.33	2091.26	2117.18	1915.12	2009.04	1968.49
ENSMUSG00000041801	2015.2	1897.62	1935.65	2085.6	2037.72	2175.7
ENSMUSG00000025234	1997.59	1951	2019	2171.46	1994.69	2033.92
ENSMUSG00000037935	1956.22	2160.34	2102.36	2100.53	1943.47	1908.51
ENSMUSG00000019804	1917.48	1866.22	2077.35	2116.71	1980.35	2174.79
ENSMUSG00000066979	1993.19	1918.56	1971.77	2237.41	1958.84	2078.45
ENSMUSG00000031697	2006.4	1962.52	2018.08	2132.89	1972.15	2037.56
ENSMUSG00000018040	2062.74	2002.29	1978.25	2053.24	1958.84	2053.01
ENSMUSG00000022890	2092.68	2094.4	1913.42	2131.64	1866.63	2026.65
ENSMUSG00000028416	1914.84	1970.89	2028.27	2029.6	2079.73	2080.27
ENSMUSG00000033060	2014.32	2070.32	1959.73	2040.8	1999.82	2014.84
ENSMUSG00000030678	2002	2036.83	2011.59	1984.8	1998.79	2047.55
ENSMUSG00000050697	1957.98	2055.67	1907.87	2218.75	1960.89	2013.93
ENSMUSG00000005871	2139.34	2030.55	2099.58	1809.34	1955.76	1960.31
ENSMUSG00000037286	2055.7	2008.57	2107.91	1916.36	1938.35	1977.58
ENSMUSG00000015880	1891.95	2118.47	2053.27	1992.27	1958.84	2021.2
ENSMUSG00000002741	1959.74	2008.57	1934.72	2010.93	2131.98	1992.12
ENSMUSG00000014748	2065.38	1942.63	1901.38	2027.11	2075.63	2011.2
ENSMUSG00000029817	1965.9	2039.97	1987.52	2059.47	1931.18	2049.37
ENSMUSG00000024483	2028.41	2004.38	2069.94	1956.18	2017.23	1928.5
ENSMUSG00000074415	1915.72	1966.7	1961.58	2109.24	2091	1997.57
ENSMUSG00000041781	2040.73	2038.92	2008.82	1992.27	1944.49	1956.67
ENSMUSG00000041360	2004.64	2077.65	1900.46	2058.22	1992.64	1975.76
ENSMUSG00000027823	2060.1	1975.08	2016.23	1928.81	1930.15	2043.01
ENSMUSG00000016256	1950.93	2050.44	1941.21	2164	2006.99	1910.32
ENSMUSG00000050017	2033.69	1922.74	2062.53	1892.72	2037.72	1987.57
ENSMUSG00000025001	2010.8	2081.84	1941.21	2053.24	1975.23	1927.59
ENSMUSG00000020899	2007.28	2055.67	1974.55	1882.76	2054.11	1974.85
ENSMUSG00000006589	2088.27	1942.63	1878.23	2176.44	1960.89	1938.5
ENSMUSG00000041408	2009.04	1980.31	2015.3	1923.83	2032.6	1971.21
ENSMUSG00000027326	2038.09	1991.82	1969.92	1829.25	2051.04	2017.56
ENSMUSG00000057522	2104.12	1894.48	2004.19	1973.6	1977.28	1948.49
ENSMUSG00000035770	1965.9	2030.55	1879.16	2022.13	2066.41	1979.39
ENSMUSG00000058070	2015.2	1953.1	1955.1	1938.76	2122.76	1928.5
ENSMUSG00000026924	1960.62	1960.42	1997.7	1849.16	2093.05	2020.29
ENSMUSG00000024474	1921	2032.64	1903.24	2154.04	2000.84	1950.31
ENSMUSG00000004880	1987.03	1993.92	1994.92	1866.59	1977.28	2040.28
ENSMUSG00000019188	1899.87	2005.43	1970.84	1964.89	2042.85	2000.3
ENSMUSG00000056394	1894.59	2024.27	1953.25	1989.78	2016.21	2009.38
ENSMUSG00000000441	1906.03	1929.02	2028.27	2056.98	2005.96	1962.13
ENSMUSG00000054823	2149.9	1945.77	1997.7	1818.05	1974.2	1926.68
ENSMUSG00000022354	1949.17	2005.43	1892.12	2122.93	1875.85	2048.46
ENSMUSG00000034168	1933.33	2012.76	2080.13	1888.98	1899.42	2023.02
ENSMUSG00000026202	2102.36	1916.46	1921.76	2017.16	1926.05	1970.31
ENSMUSG00000046691	2017.84	1963.56	1953.25	1885.25	1996.74	2019.38
ENSMUSG00000027803	2092.68	2024.27	2064.39	1850.41	1994.69	1803.99
ENSMUSG00000029152	1927.16	1930.07	2000.48	2110.49	1938.35	1976.67
ENSMUSG00000050565	1952.69	2077.65	2058.83	1897.7	1944.49	1903.96
ENSMUSG00000000088	1972.06	2083.93	1915.28	1984.8	1917.86	1978.49
ENSMUSG00000023092	2075.95	1780.39	1969.92	2090.58	1920.93	1999.39
ENSMUSG00000026374	1904.27	2100.68	1938.43	1944.98	1978.3	1982.12
ENSMUSG00000032393	2075.07	1956.24	1993.07	1855.39	1961.91	1953.95
ENSMUSG00000056537	2071.55	1966.7	2036.6	1706.06	2012.11	1950.31
ENSMUSG00000035133	2004.64	1971.94	2054.2	1891.47	1892.24	1950.31
ENSMUSG00000040990	1962.38	2046.25	1898.6	1832.99	2011.09	2017.56
ENSMUSG00000029394	1862.01	1984.5	1815.25	2069.42	2055.14	2040.28
ENSMUSG00000028402	2011.68	1976.12	2012.52	1901.43	1993.67	1871.25
ENSMUSG00000033938	2002.88	1946.82	1864.34	2009.69	2018.26	1936.68
ENSMUSG00000093904	2138.46	1978.22	2139.4	1845.43	1746.77	1852.16
ENSMUSG00000068329	1965.02	2000.2	1918.98	1958.67	1941.42	1971.21
ENSMUSG00000034311	1994.95	1951	2049.57	1927.56	1863.56	1939.41
ENSMUSG00000008475	2069.79	1944.72	1859.71	1972.36	1950.64	1940.31
ENSMUSG00000026116	1993.19	1885.06	2026.41	1832.99	1999.82	1955.76
ENSMUSG00000032253	2079.47	1959.38	1974.55	1866.59	1920.93	1892.15
ENSMUSG00000021012	1979.99	1929.02	1937.5	1906.41	2020.31	1928.5
ENSMUSG00000054874	1971.18	1922.74	2007.89	1931.29	2001.87	1867.61
ENSMUSG00000021820	1977.34	1866.22	1839.33	2065.69	1953.71	2018.47
ENSMUSG00000030884	1916.6	1924.84	1887.49	1988.54	1973.18	2018.47
ENSMUSG00000001016	1864.66	1945.77	2016.23	1940	2009.04	1928.5
ENSMUSG00000020493	2003.76	2009.62	1983.81	1891.47	1920.93	1868.52
ENSMUSG00000022708	2038.09	1864.13	2022.71	1806.85	2039.77	1875.79
ENSMUSG00000045427	1955.33	2017.99	1918.05	1933.78	2020.31	1851.25
ENSMUSG00000029407	1914.84	1951	1969.92	1901.43	1974.2	1962.13
ENSMUSG00000030530	1961.5	1761.55	1961.58	1793.17	2067.43	2081.18
ENSMUSG00000026657	1955.33	1993.92	1862.48	1882.76	2022.36	1956.67
ENSMUSG00000029577	1958.86	1964.61	2050.49	1809.34	1924	1930.32
ENSMUSG00000001435	1832.08	1862.04	1898.6	1930.05	2059.24	2086.63
ENSMUSG00000033487	1988.79	2023.22	1954.17	1856.63	2010.06	1825.8
ENSMUSG00000021816	1991.43	1846.34	1928.24	1916.36	1963.96	1999.39
ENSMUSG00000034595	1983.51	2022.18	1985.66	1830.5	2008.01	1811.26
ENSMUSG00000034525	2003.76	1943.68	2003.26	1907.65	1908.64	1857.61
ENSMUSG00000015653	2016.08	1979.26	1963.44	1775.75	1922.98	1935.77
ENSMUSG00000029616	1853.21	1936.35	1895.83	2139.11	1888.15	1973.03
ENSMUSG00000052488	1944.77	1956.24	1855.08	1871.56	1998.79	1985.76
ENSMUSG00000021244	1959.74	1937.4	1914.35	1829.25	1997.77	1959.4
ENSMUSG00000035901	1955.33	1927.98	1956.03	1821.79	1956.79	1969.4
ENSMUSG00000042133	1816.23	1941.58	1848.59	2052	2011.09	1983.03
ENSMUSG00000097472	1928.04	1922.74	1917.13	1900.18	1968.06	1964.85
ENSMUSG00000036057	1914.84	1916.46	2012.52	1968.63	1824.63	1965.76
ENSMUSG00000065954	1947.41	1929.02	1962.51	1857.87	1966.01	1924.87
ENSMUSG00000034543	1879.62	2005.43	1855.08	2035.82	1935.27	1924.87
ENSMUSG00000031007	1964.14	1826.45	1874.52	2037.07	1948.59	1956.67
ENSMUSG00000075232	1936.85	1835.87	1875.45	2019.65	1980.35	1951.22
ENSMUSG00000040021	2058.34	1828.54	1873.6	1877.79	2076.65	1848.52
ENSMUSG00000042548	1895.47	1957.28	2016.23	1697.35	1996.74	1965.76
ENSMUSG00000034290	2006.4	1964.61	1849.52	1882.76	2016.21	1834.89
ENSMUSG00000026618	1852.33	2088.12	1908.79	1912.63	1913.76	1891.24
ENSMUSG00000035168	1943.89	1956.24	2119.95	1821.79	1872.78	1805.81
ENSMUSG00000044791	1936.85	1992.87	2039.38	1862.85	1770.33	1918.5
ENSMUSG00000032547	1810.95	1878.78	1726.34	1959.91	2153.49	2040.28
ENSMUSG00000021796	1868.18	2068.23	2092.17	1857.87	1746.77	1879.42
ENSMUSG00000038914	1959.74	1920.65	1908.79	1915.12	1931.18	1887.6
ENSMUSG00000019189	1950.93	1885.06	2008.82	1844.19	1927.08	1884.88
ENSMUSG00000021156	1971.18	1926.93	1945.84	1879.03	1864.58	1915.78
ENSMUSG00000028729	1892.83	2055.67	1790.25	1981.07	1918.88	1913.96
ENSMUSG00000027706	1943.89	1909.14	1879.16	2024.62	1879.95	1900.33
ENSMUSG00000027933	1845.29	1881.92	1918.98	1992.27	1916.83	1975.76
ENSMUSG00000051510	1880.5	1885.06	1940.28	1910.14	2013.13	1877.61
ENSMUSG00000028883	2038.97	1965.66	2011.59	1779.48	1734.47	1915.78
ENSMUSG00000029826	1937.73	1930.07	1829.14	1779.48	2001.87	1989.39
ENSMUSG00000058301	1909.55	1862.04	1966.21	1776.99	1988.55	1955.76
ENSMUSG00000025492	1868.18	1900.76	1841.18	2149.06	1863.56	1925.77
ENSMUSG00000027340	1849.69	1837.96	1937.5	1896.45	2024.4	1943.95
ENSMUSG00000054150	2002	1907.04	1916.2	1831.74	1981.38	1832.17
ENSMUSG00000033257	1985.27	1998.1	1918.98	1832.99	1896.34	1837.62
ENSMUSG00000068749	1834.72	1923.79	1872.67	2063.2	1908.64	1920.32
ENSMUSG00000019173	1954.45	1918.56	1898.6	2005.96	1879.95	1836.71
ENSMUSG00000026526	1822.4	1978.22	1899.53	2134.13	1876.88	1824.9
ENSMUSG00000079562	1914.84	1897.62	1890.27	1852.9	2031.58	1872.15
ENSMUSG00000028032	1829.44	1889.25	1872.67	1969.87	1920.93	1997.57
ENSMUSG00000001229	1936.85	1837.96	2033.82	1870.32	1906.59	1857.61
ENSMUSG00000048874	1940.37	1894.48	1827.29	2003.47	1954.74	1865.79
ENSMUSG00000022680	1929.8	1886.11	2007.89	1921.34	1797.99	1893.97
ENSMUSG00000039801	1864.66	2001.24	1898.6	1728.46	2008.01	1912.14
ENSMUSG00000021024	1871.7	1954.14	1830.07	1941.25	1885.07	1959.4
ENSMUSG00000003402	1907.79	1882.97	1857.85	1937.52	1982.4	1866.7
ENSMUSG00000048327	1937.73	1841.1	1887.49	1898.94	1866.63	1973.03
ENSMUSG00000038127	2012.56	1888.2	1925.46	1748.37	1850.24	1939.41
ENSMUSG00000037111	1971.18	1864.13	1915.28	1888.98	1946.54	1821.26
ENSMUSG00000053110	1851.45	1785.63	1941.21	1870.32	2045.92	1913.05
ENSMUSG00000035953	1805.67	1884.02	1878.23	1972.36	1963.96	1928.5
ENSMUSG00000024883	1896.35	1878.78	1957.88	1888.98	1842.04	1927.59
ENSMUSG00000007080	1921.88	1956.24	1905.09	1842.94	1925.03	1840.35
ENSMUSG00000031392	1921	1915.42	1885.64	1795.66	1924	1925.77
ENSMUSG00000005370	1865.54	2009.62	1842.11	1932.54	1803.11	1944.86
ENSMUSG00000068036	2015.2	1910.18	1907.87	1762.06	1914.78	1834.89
ENSMUSG00000033166	1954.45	1797.14	1930.09	1942.49	1878.93	1871.25
ENSMUSG00000001441	1899.87	1943.68	1894.9	1857.87	1842.04	1927.59
ENSMUSG00000017929	1963.26	1921.7	1960.66	1735.92	1886.1	1866.7
ENSMUSG00000024542	1988.79	1819.12	2006.04	1911.38	1876.88	1761.28
ENSMUSG00000038241	1882.26	2022.18	1909.72	1737.17	2015.18	1791.27
ENSMUSG00000004056	1917.48	1783.53	1843.96	1952.45	1969.08	1901.24
ENSMUSG00000021149	1891.07	1890.3	1862.48	1984.8	1874.83	1877.61
ENSMUSG00000027652	1890.19	1897.62	1931.95	1835.48	1995.72	1803.99
ENSMUSG00000060904	1937.73	1798.19	1876.38	2003.47	1845.12	1904.87
ENSMUSG00000019802	1801.27	1845.29	1838.41	1860.36	1992.64	2013.93
ENSMUSG00000009073	1888.43	1917.51	1906.94	1913.87	1855.36	1861.25
ENSMUSG00000039191	1898.99	1880.88	1812.47	1895.21	1939.37	1912.14
ENSMUSG00000032604	1843.53	2035.78	1819.88	2005.96	1836.92	1837.62
ENSMUSG00000037234	1958.86	1917.51	1906.01	1778.23	1984.45	1771.28
ENSMUSG00000039910	1875.22	1815.98	1923.61	1852.9	1999.82	1853.98
ENSMUSG00000006299	1789.82	1894.48	1908.79	1930.05	1910.69	1893.06
ENSMUSG00000040029	1841.77	1919.6	1968.07	1815.57	1890.2	1859.43
ENSMUSG00000038909	1849.69	1853.66	1891.2	1866.59	1934.25	1904.87
ENSMUSG00000034165	1816.23	1870.41	1912.5	1903.92	1848.19	1933.04
ENSMUSG00000025511	1919.24	1821.22	1909.72	1859.12	1819.51	1929.41
ENSMUSG00000035621	1883.14	1956.24	1923.61	1813.08	1842.04	1847.62
ENSMUSG00000020705	1754.61	2003.34	1909.72	1927.56	1852.29	1860.34
ENSMUSG00000029062	1809.19	1897.62	1832.85	1949.96	1828.73	1971.21
ENSMUSG00000021068	1970.3	1881.92	1945.84	1645.08	1928.1	1831.26
ENSMUSG00000060739	1797.75	1898.67	1941.21	1913.87	1827.7	1882.15
ENSMUSG00000033272	1840	1865.18	1794.88	1824.28	1943.47	1970.31
ENSMUSG00000079614	1864.66	1798.19	1892.12	1926.32	1835.9	1925.77
ENSMUSG00000029020	1835.6	1849.48	1903.24	1767.03	1904.54	1953.04
ENSMUSG00000018286	1906.91	1923.79	1808.77	1938.76	1854.34	1818.53
ENSMUSG00000010663	1867.3	1837.96	1941.21	1743.39	1876.88	1923.96
ENSMUSG00000015133	1848.81	1862.04	1970.84	1724.73	1951.66	1831.26
ENSMUSG00000049751	1776.62	1868.32	1895.83	2045.78	1780.57	1891.24
ENSMUSG00000033004	1950.93	1869.36	1949.54	1733.44	1766.23	1893.97
ENSMUSG00000024045	1859.37	1994.96	1791.17	1997.25	1755.99	1851.25
ENSMUSG00000033335	1968.54	1812.84	1842.11	1758.32	1870.73	1912.14
ENSMUSG00000021540	1972.94	2045.2	1997.7	1638.86	1709.88	1783.09
ENSMUSG00000020570	1921	1820.17	1952.32	1691.13	1827.7	1927.59
ENSMUSG00000028760	1870.82	1931.12	1896.75	1712.28	1900.44	1847.62
ENSMUSG00000032740	1987.03	1848.43	1885.64	1647.57	1825.65	1918.5
ENSMUSG00000026914	1845.29	1844.24	1879.16	1845.43	1930.15	1836.71
ENSMUSG00000026176	1767.81	1805.52	1837.48	1912.63	1938.35	1932.14
ENSMUSG00000021814	1707.95	1876.69	1783.76	2018.4	1858.44	1976.67
ENSMUSG00000023118	1930.68	1870.41	1821.73	1841.7	1832.82	1864.88
ENSMUSG00000020738	1869.94	1864.13	1839.33	1890.23	1862.53	1852.16
ENSMUSG00000060166	1847.93	1877.74	1906.01	1686.15	1909.66	1900.33
ENSMUSG00000028180	1869.94	1846.34	1768.02	1976.09	1899.42	1826.71
ENSMUSG00000009090	1902.51	1801.33	1805.06	1830.5	1868.68	1922.14
ENSMUSG00000032875	1966.78	1862.04	1857.85	1765.79	1876.88	1790.36
ENSMUSG00000043909	1818.88	1907.04	1790.25	1885.25	1818.48	1928.5
ENSMUSG00000018171	1864.66	1917.51	1705.04	2040.8	1811.31	1846.71
ENSMUSG00000020196	1739.64	1810.75	1934.72	1786.94	1955.76	1899.42
ENSMUSG00000027555	1783.66	1879.83	1879.16	1946.23	1895.32	1781.27
ENSMUSG00000022812	1859.37	1913.32	2025.49	1708.55	1777.5	1802.18
ENSMUSG00000022822	1850.57	1834.82	1796.73	1969.87	1860.48	1825.8
ENSMUSG00000032252	1804.79	1884.02	1889.34	1956.18	1779.55	1820.35
ENSMUSG00000020918	1923.64	2043.11	1965.29	1747.12	1683.25	1714.02
ENSMUSG00000002546	1715.87	1947.86	1866.19	1888.98	1936.3	1778.55
ENSMUSG00000039041	1804.79	1984.5	1785.61	1869.07	1831.8	1834.89
ENSMUSG00000037916	1867.3	1901.81	1782.84	1803.12	1820.53	1890.33
ENSMUSG00000034566	1752.85	1895.53	1844.89	2015.91	1719.1	1873.06
ENSMUSG00000029571	1770.45	1850.52	1843.96	1778.23	1904.54	1902.14
ENSMUSG00000020180	1763.41	1841.1	1845.81	1969.87	1836.92	1835.8
ENSMUSG00000000078	1854.09	1758.41	1847.67	1800.63	1928.1	1848.52
ENSMUSG00000005124	1863.77	1773.07	1835.63	1764.55	1835.9	1941.22
ENSMUSG00000022682	1870.82	1811.8	1820.81	1823.03	1786.72	1915.78
ENSMUSG00000053062	1866.42	1837.96	1856.93	1791.92	1836.92	1833.98
ENSMUSG00000040711	1821.52	1855.76	1863.41	1691.13	1858.44	1913.05
ENSMUSG00000027111	1929.8	1907.04	1917.13	1698.59	1752.91	1788.54
ENSMUSG00000028960	1836.48	1858.9	1843.96	1708.55	1911.71	1846.71
ENSMUSG00000031591	1840	1773.07	1831.92	1879.03	1849.22	1855.8
ENSMUSG00000024070	1832.08	1822.26	1818.03	1864.1	1822.58	1869.43
ENSMUSG00000037351	1832.08	1828.54	1829.14	1890.23	1825.65	1829.44
ENSMUSG00000003235	1732.6	1830.64	1778.21	1884.01	1833.85	1972.12
ENSMUSG00000026260	1746.68	1777.25	1901.38	1831.74	1900.44	1858.52
ENSMUSG00000051329	1847.93	1802.38	1826.37	1794.41	1808.24	1906.69
ENSMUSG00000036180	1906.03	1760.51	1861.56	1768.28	1860.48	1820.35
ENSMUSG00000016528	1784.54	1775.16	1819.88	1927.56	1898.39	1820.35
ENSMUSG00000029068	1812.71	1840.06	1851.37	2013.42	1849.22	1684.03
ENSMUSG00000022307	1934.21	1832.73	1944.91	1727.21	1769.3	1749.46
ENSMUSG00000030061	1887.55	1801.33	1788.39	1937.52	1742.67	1845.8
ENSMUSG00000022200	1883.14	1849.48	1789.32	1722.24	1861.51	1858.52
ENSMUSG00000019362	1745.8	1750.04	1787.47	2119.2	1858.44	1800.36
ENSMUSG00000025066	1755.49	1986.59	1686.52	1893.96	1882	1826.71
ENSMUSG00000020538	1769.57	1780.39	1850.45	1768.28	1934.25	1870.34
ENSMUSG00000025583	1938.61	1920.65	1971.77	1599.04	1762.13	1728.56
ENSMUSG00000052684	1935.97	1810.75	1854.15	1854.14	1764.18	1748.56
ENSMUSG00000043858	1835.6	1922.74	1897.68	1774.5	1794.92	1741.28
ENSMUSG00000022781	1841.77	1827.5	1845.81	1712.28	1845.12	1864.88
ENSMUSG00000040940	1806.55	1841.1	1835.63	1810.59	1850.24	1812.17
ENSMUSG00000026421	1759.89	1805.52	1729.12	1881.52	1794.92	1991.21
ENSMUSG00000014195	1737.88	1741.67	1751.35	1957.43	1925.03	1874.88
ENSMUSG00000079442	1781.9	1797.14	1916.2	1733.44	1939.37	1769.46
ENSMUSG00000040720	1918.36	1734.34	1794.88	1750.86	1898.39	1814.9
ENSMUSG00000031232	1725.55	1919.6	1774.5	1813.08	1776.48	1930.32
ENSMUSG00000020808	1759.01	1899.72	1840.26	1846.68	1765.21	1833.08
ENSMUSG00000070493	1787.18	1770.97	1713.38	2054.49	1887.12	1773.09
ENSMUSG00000027797	1730.84	1798.19	1780.98	1861.61	1937.32	1835.8
ENSMUSG00000027379	1879.62	1857.85	1813.4	1839.21	1668.9	1852.16
ENSMUSG00000029090	1797.75	1769.93	1869.89	1692.37	1939.37	1823.08
ENSMUSG00000023852	1823.28	1937.4	1880.08	1667.48	1754.96	1821.26
ENSMUSG00000020776	1921	1934.26	1917.13	1713.53	1731.4	1670.4
ENSMUSG00000025487	1872.58	1855.76	1685.59	1729.7	1919.91	1833.08
ENSMUSG00000004591	1930.68	1746.9	1874.52	1750.86	1762.13	1802.18
ENSMUSG00000024817	1824.16	1813.89	1869.89	1784.46	1812.33	1788.54
ENSMUSG00000063450	1890.19	1870.41	1931.95	1648.82	1849.22	1676.76
ENSMUSG00000026174	1840.88	1828.54	1816.18	1798.14	1811.31	1797.63
ENSMUSG00000027091	1800.39	1913.32	1756.9	1820.54	1821.55	1797.63
ENSMUSG00000025862	1866.42	1840.06	1836.55	1745.88	1809.26	1776.73
ENSMUSG00000038406	1907.79	1802.38	1662.44	1724.73	1907.61	1865.79
ENSMUSG00000030557	1908.67	1818.08	1974.55	1711.04	1758.04	1686.76
ENSMUSG00000043207	1856.73	1702.94	1810.62	1774.5	1936.3	1791.27
ENSMUSG00000028614	1806.55	1931.12	1798.58	1678.68	1815.41	1829.44
ENSMUSG00000028580	1855.85	1777.25	1779.13	1790.68	1844.09	1820.35
ENSMUSG00000054604	1837.36	1757.37	1714.3	1831.74	1948.59	1797.63
ENSMUSG00000035575	1811.83	1832.73	1772.65	1847.92	1802.09	1813.08
ENSMUSG00000026031	1817.11	1826.45	1725.41	1824.28	1829.75	1841.25
ENSMUSG00000027195	1834.72	1896.58	1774.5	1742.15	1830.77	1771.28
ENSMUSG00000032601	1861.13	1752.13	1868.97	1673.71	1797.99	1843.07
ENSMUSG00000032212	1730.84	1856.8	1781.91	1800.63	1864.58	1818.53
ENSMUSG00000034271	1757.25	1766.79	1837.48	1775.75	1905.56	1795.81
ENSMUSG00000041417	1763.41	1781.44	1864.34	1682.42	1957.81	1771.28
ENSMUSG00000021072	1877.86	1879.83	1807.84	1764.55	1698.61	1792.18
ENSMUSG00000002372	1828.56	1885.06	1707.82	1824.28	1761.11	1833.08
ENSMUSG00000001750	1830.32	1860.99	1875.45	1820.54	1629.97	1805.81
ENSMUSG00000093930	1622.55	1750.04	1805.06	1944.98	1919.91	1832.17
ENSMUSG00000002015	1823.28	1877.74	1855.08	1952.45	1644.32	1703.11
ENSMUSG00000024914	1864.66	1829.59	1662.44	1825.52	1863.56	1788.54
ENSMUSG00000041645	1830.32	1863.08	1817.1	1742.15	1853.31	1708.57
ENSMUSG00000006169	1898.99	1859.94	1829.14	1706.06	1777.5	1718.56
ENSMUSG00000002997	1742.28	1778.3	1953.25	1714.77	1849.22	1747.65
ENSMUSG00000018559	1868.18	1782.49	1814.33	1800.63	1738.57	1778.55
ENSMUSG00000035545	1731.72	1776.21	1868.97	1893.96	1762.13	1780.36
ENSMUSG00000049550	1742.28	1834.82	1857.85	1769.52	1767.26	1806.72
ENSMUSG00000018765	1893.71	1712.36	1717.08	1917.61	1787.75	1765.82
ENSMUSG00000028413	1800.39	1732.25	1805.99	1769.52	1788.77	1861.25
ENSMUSG00000021807	1742.28	1757.37	1799.51	1764.55	1851.26	1843.07
ENSMUSG00000037852	1830.32	1600.37	1692.07	1952.45	1862.53	1845.8
ENSMUSG00000025423	1836.48	1690.38	1788.39	1773.26	1896.34	1762.19
ENSMUSG00000055670	1795.99	1680.96	1836.55	1818.05	1849.22	1768.55
ENSMUSG00000036103	1760.77	1762.6	1762.46	1778.23	1851.26	1819.44
ENSMUSG00000071533	1746.68	1734.34	1808.77	1913.87	1692.47	1854.89
ENSMUSG00000034602	1805.67	1730.15	1829.14	1655.04	1960.89	1724.93
ENSMUSG00000027170	1822.4	1683.05	1818.03	1842.94	1763.16	1793.09
ENSMUSG00000024614	1830.32	1737.48	1665.22	1739.66	1823.6	1902.14
ENSMUSG00000027177	1764.29	1791.91	1842.11	1643.84	1821.55	1817.63
ENSMUSG00000036046	1738.76	1795.05	1883.79	1682.42	1807.21	1784.91
ENSMUSG00000060038	1792.46	1754.23	1745.79	1885.25	1769.3	1775.82
ENSMUSG00000061613	1783.66	1851.57	1750.42	1876.54	1795.94	1673.12
ENSMUSG00000028843	1759.01	1723.87	1729.12	1811.83	1921.95	1759.46
ENSMUSG00000029598	1684.18	1673.63	1804.14	1723.48	1874.83	1911.23
ENSMUSG00000024283	1795.99	1634.91	1801.36	1780.72	1860.48	1803.08
ENSMUSG00000042772	1841.77	1796.1	1789.32	1669.97	1712.96	1839.44
ENSMUSG00000017721	1781.02	1822.26	1741.16	1637.62	1778.53	1883.97
ENSMUSG00000003345	1841.77	1985.54	1987.52	1551.75	1611.53	1646.77
ENSMUSG00000039682	1786.3	1874.6	1730.05	1760.81	1790.82	1741.28
ENSMUSG00000019055	1732.6	1752.13	1759.68	1762.06	1823.6	1833.98
ENSMUSG00000039477	1794.22	1769.93	1831.92	1620.2	1867.66	1748.56
ENSMUSG00000074884	1731.72	1799.24	1738.38	1956.18	1624.85	1838.53
ENSMUSG00000021978	1795.99	1705.03	1718.01	1799.39	1751.89	1872.15
ENSMUSG00000002658	1772.21	1846.34	1754.13	1783.21	1839.99	1670.4
ENSMUSG00000063882	1731.72	1703.99	1722.64	1933.78	1810.28	1782.18
ENSMUSG00000024270	1810.95	1778.3	1796.73	1808.1	1660.71	1784
ENSMUSG00000020439	1780.14	1785.63	1682.81	1732.19	1833.85	1816.72
ENSMUSG00000039202	1789.82	1637	1845.81	1697.35	1795.94	1834.89
ENSMUSG00000072825	1857.61	1632.81	1768.02	1757.08	1735.5	1853.98
ENSMUSG00000039100	1877.86	1792.95	1805.99	1696.1	1658.66	1768.55
ENSMUSG00000034751	1737	1727.01	1741.16	1725.97	1891.22	1805.81
ENSMUSG00000030779	1732.6	1729.11	1865.26	1866.59	1717.06	1734.92
ENSMUSG00000020089	1795.99	1756.32	1737.45	1845.43	1723.2	1780.36
ENSMUSG00000020536	1769.57	1789.81	1809.69	1702.33	1736.52	1799.45
ENSMUSG00000006673	1788.06	1785.63	1773.57	1691.13	1754.96	1810.35
ENSMUSG00000034820	1714.11	1711.31	1795.8	1926.32	1777.5	1731.29
ENSMUSG00000024095	1749.32	1774.11	1810.62	1754.59	1681.2	1827.62
ENSMUSG00000090266	1699.14	1776.21	1780.98	1901.43	1696.57	1785.82
ENSMUSG00000013858	1703.54	1709.22	1825.44	1763.3	1746.77	1851.25
ENSMUSG00000001419	1743.16	1759.46	1816.18	1687.39	1793.89	1785.82
ENSMUSG00000008393	1793.34	1876.69	1886.56	1684.9	1655.59	1679.49
ENSMUSG00000045414	1744.04	1803.42	1719.86	1699.84	1788.77	1825.8
ENSMUSG00000037643	1745.8	1806.56	1799.51	1770.77	1751.89	1716.75
ENSMUSG00000016494	1765.17	1672.59	1764.31	1836.72	1835.9	1724.02
ENSMUSG00000022770	1743.16	1781.44	1761.53	1714.77	1670.95	1886.69
ENSMUSG00000015839	2011.68	1897.62	1956.95	1480.82	1593.09	1556.8
ENSMUSG00000097660	1729.08	1808.66	1751.35	1732.19	1803.11	1754.01
ENSMUSG00000027198	1735.24	1765.74	1658.73	1927.56	1789.79	1744.01
ENSMUSG00000003868	1719.39	1798.19	1722.64	1831.74	1651.49	1842.16
ENSMUSG00000004085	1710.59	1796.1	1805.99	1612.73	1846.14	1751.28
ENSMUSG00000021737	1803.91	1746.9	1670.77	1786.94	1782.62	1757.64
ENSMUSG00000000384	1747.56	1756.32	1725.41	1709.79	1755.99	1830.35
ENSMUSG00000021039	1716.75	1832.73	1719.86	1765.79	1790.82	1726.74
ENSMUSG00000028645	1714.11	1814.94	1743.01	1832.99	1715.01	1734.92
ENSMUSG00000059273	1737	1831.68	1810.62	1667.48	1710.91	1721.29
ENSMUSG00000001855	1697.38	1679.91	1843.04	1592.82	1819.51	1809.45
ENSMUSG00000041415	1749.32	1761.55	1676.33	1668.73	1802.09	1803.99
ENSMUSG00000078622	1854.97	1837.96	1710.6	1795.66	1627.92	1644.95
ENSMUSG00000029599	1713.23	1733.29	1734.68	1714.77	1884.05	1689.48
ENSMUSG00000025372	1665.69	1707.13	1764.31	1722.24	1767.26	1824.9
ENSMUSG00000028955	1710.59	1853.66	1791.17	1801.88	1655.59	1661.31
ENSMUSG00000022536	1723.79	1629.67	1695.78	1851.65	1768.28	1791.27
ENSMUSG00000055296	1788.94	1639.09	1900.46	1669.97	1691.44	1710.39
ENSMUSG00000037104	1582.93	1651.65	1751.35	1862.85	1804.14	1809.45
ENSMUSG00000022309	1810.07	1668.4	1776.35	1677.44	1628.95	1815.81
ENSMUSG00000022475	1714.99	1812.84	1830.07	1760.81	1761.11	1556.8
ENSMUSG00000047866	1685.06	1682.01	1754.13	1785.7	1681.2	1808.54
ENSMUSG00000024912	1694.74	1722.83	1803.21	1769.52	1638.17	1764.91
ENSMUSG00000054405	1740.52	1836.92	1683.74	1823.03	1646.37	1686.76
ENSMUSG00000029910	1635.76	1696.66	1751.35	1953.69	1638.17	1754.92
ENSMUSG00000026965	1719.39	1764.69	1790.25	1676.19	1735.5	1685.85
ENSMUSG00000073639	1753.73	1774.11	1675.4	1734.68	1790.82	1654.95
ENSMUSG00000028873	1751.09	1746.9	1666.14	1783.21	1666.86	1764.91
[truncated: 39,261 more rows]

## Sheet: ST6_Normalized Count Table MT
Supplementary Table 6. Normalized count table from myotubes. Negative Control (CTM), miR-155 mimic (MIM)
	CTM_MT1	CTM_MT2	CTM_MT3	MIM_MT1	MIM_MT2	MIM_MT3
ENSMUSG00000026193	262301	262231	266802	263087	249031	259499
ENSMUSG00000064351	216795	223475	194035	234296	239967	252302
ENSMUSG00000026043	119964	118178	120240	115850	123971	122641
ENSMUSG00000040152	102806	103141	108482	98951.3	89381.9	94183.3
ENSMUSG00000051747	67421.1	76285.1	60626.6	83245.4	69594.5	82974.6
ENSMUSG00000037742	65267.7	65182	64062.2	72707.4	77212.1	74470.4
ENSMUSG00000000031	64629.2	62284.2	60814.5	72687.1	80214.2	77618
ENSMUSG00000064354	58283.7	60786.4	56022.1	67337.2	63998.6	63620
ENSMUSG00000092341	45081.3	61750.1	44030.9	70031.9	45865	35486.5
ENSMUSG00000064358	45220.7	46598.8	43335.5	49750.7	48779.5	50415.8
ENSMUSG00000064370	45798.8	45598.1	41835.3	50070.6	47667.7	47331.4
ENSMUSG00000031972	45190	44103	43088.2	44502.9	50630.5	51075.6
ENSMUSG00000064367	45792.7	42687.4	40591.9	49300.8	49123.1	49219.6
ENSMUSG00000064363	43818.6	43750	37825.7	49464.6	45937.7	48065.3
ENSMUSG00000031375	41272.6	40900.3	41717.3	42189.7	42355.5	42254.9
ENSMUSG00000064357	41093.3	40483.6	37009.6	44207.1	42319.7	42836.4
ENSMUSG00000034994	38934.7	38862.8	38043.2	40461.3	45288.4	45031.3
ENSMUSG00000060126	39179.7	39111.4	35495.4	38321.5	40477.9	40727.2
ENSMUSG00000018593	38454	37835.3	39557.4	38481.4	38606.1	38605.2
ENSMUSG00000023067	40293.8	40504.8	41005.2	28795.1	33217.8	31863.6
ENSMUSG00000032294	33485.1	33404.6	34031.1	35006.3	38641.8	37801.6
ENSMUSG00000035783	35206	34769.4	36446.9	32906	33361.9	34754.9
ENSMUSG00000040249	34738.6	34860.9	34620.8	34601.7	33453.1	35099.2
ENSMUSG00000042451	35535	34581.8	34164.7	31841.4	34767.8	34952.3
ENSMUSG00000029661	34775.5	34363.7	35147.7	32755.7	32653.8	32956.8
ENSMUSG00000064341	32233.6	32148.8	28271.4	36886	35166.9	34455.5
ENSMUSG00000026042	32574.9	32269.9	34274.8	32092.9	32066.8	31697.3
ENSMUSG00000028649	28507.9	30617.7	26863.8	34013	27896.4	30142.8
ENSMUSG00000028195	29877.2	28604.3	31215	27981.9	29566.4	30476.5
ENSMUSG00000057666	29202.8	28044.3	29015	26110.9	31927.2	33167.1
ENSMUSG00000038418	28963	27207.1	27123.3	28608.2	31252.5	32768
ENSMUSG00000026208	28372.6	27683.9	27123.3	28459.8	30136.1	30565.5
ENSMUSG00000022443	28490.5	28563.6	27900.9	29088	28189.3	28465
ENSMUSG00000004891	26310.4	25968.9	26845.5	30206.5	28245.8	26492.1
ENSMUSG00000029580	26648.7	27753.2	26867.3	24755.4	25555.2	26366.5
ENSMUSG00000028763	26539	26381	25950.8	24534.8	24924.3	26382.6
ENSMUSG00000026131	25011.8	25665.8	23493.8	28826.9	24529.9	26768.8
ENSMUSG00000064345	23506.2	23723.5	20724.1	27931.8	26935.7	26618.6
ENSMUSG00000028464	23914.1	23113.7	23731.5	24267.9	25525.2	25568.4
ENSMUSG00000068699	23730.6	24071.9	23480.7	22808.3	22768.7	24618.9
ENSMUSG00000030695	22644.2	21723.9	22087.1	22372.8	26142.2	27210.8
ENSMUSG00000001506	25384.9	23515.6	24449.7	20879.5	22675.3	22596.7
ENSMUSG00000026459	25424.9	24965.4	25528.8	19990.3	21909.5	21004.6
ENSMUSG00000034220	23846.5	23237.5	22742.4	20762.9	23263.5	24001
ENSMUSG00000026837	22540.7	22088.9	21832.9	21002.8	21400.9	21666.5
ENSMUSG00000031328	22056.9	22307.9	22736.3	21172.4	19186.5	20460.7
ENSMUSG00000026185	19422.8	20139.2	19956.1	23340.1	22080.2	22176.1
ENSMUSG00000023944	20453.9	20036.7	20227.8	22527	21376.7	21057.2
ENSMUSG00000032366	20774.7	20659.5	21549.8	21218.6	20456.3	20491.8
ENSMUSG00000086503	19810.2	20766.6	20221.7	23260.2	19397.6	20146.4
ENSMUSG00000007891	20381.1	20794.4	21150.5	19089.5	20446	20746.1
ENSMUSG00000031740	19832.8	19539.5	20553.7	19751.3	21569.3	21714.8
ENSMUSG00000025393	19674.9	19482.2	19378.5	19878.5	20658.2	20810.4
ENSMUSG00000069833	18243.1	19109.9	16469.9	22179.2	19940.8	20089.5
ENSMUSG00000025348	19117.3	19560.8	19345.3	17808.1	18735.6	19142.2
ENSMUSG00000026728	17333.9	17177.7	16780.9	19572.1	21730.8	20443.5
ENSMUSG00000019997	18803.7	17855	19742.9	17276.3	18460	19651.8
ENSMUSG00000024803	18451.1	18763.3	19810.2	18844.7	17422	17595.2
ENSMUSG00000020473	18989.2	18184.9	19164.5	17721.4	17786.4	17687.5
ENSMUSG00000068220	18487	18610	19414.4	17191.5	17815.3	17784
ENSMUSG00000024740	18117	17946.5	17628.5	18410.2	18811.7	18226
ENSMUSG00000021939	18062.7	17953.9	18129.1	17863	17914.4	18626.2
ENSMUSG00000022565	18296.4	18503.7	16897.1	17195.3	17231.7	18524.3
ENSMUSG00000023150	16927	17369	16537.2	18810.1	17916.7	18470.6
ENSMUSG00000031461	17624	17237.8	16833.4	17762.8	18032.1	18334.4
ENSMUSG00000025203	15623.3	15070.9	14262.8	20946	19078.1	20094.9
ENSMUSG00000064339	16529.3	16919	15723.7	17389	18747.1	19041.4
ENSMUSG00000091898	16614.4	17326.5	17633.7	17097.1	17462.3	17250.8
ENSMUSG00000030672	16945.5	17620.3	17564.7	16528.6	16794.6	17017
ENSMUSG00000032332	15958.4	15605	15714.1	18987.3	17025.2	17722.9
ENSMUSG00000032216	16394.1	16880.2	16262.8	17464.1	16841.9	16814.2
ENSMUSG00000001119	15985.1	15881.3	16307.4	15581.6	15941.1	16121.2
ENSMUSG00000038615	15508.5	15338	14968.8	15839.8	17411.6	16917.2
ENSMUSG00000026414	14061.3	13952.8	14795.8	17010.4	17298.6	16920.4
ENSMUSG00000027107	15302.5	15713.1	15676.5	14442.8	15336.8	15738.2
ENSMUSG00000020719	14975.5	15310.2	15585.7	16187.6	14973.5	14969
ENSMUSG00000024529	14498.9	14286.4	14326.6	16449.6	16262.9	16444.1
ENSMUSG00000027204	15451.1	15795.4	15371.6	15056.5	14303.4	14890.6
ENSMUSG00000026950	14176.1	15030.3	13299.1	16350.4	15140.7	17281.9
ENSMUSG00000056328	14843.3	14585.8	13654.7	15412	14792.4	15929.1
ENSMUSG00000067274	14627	14877.8	14723.3	13659.5	15349.5	15475.3
ENSMUSG00000061816	15064.7	15350.9	14586.1	13400.4	14949.3	14838.1
ENSMUSG00000026418	13960.8	14414.9	14505.7	13177.8	15708.1	15784.3
ENSMUSG00000004207	14284.7	14190.3	14815	14160.5	14658.6	14444.4
ENSMUSG00000025351	14191.4	14430.6	15654.7	13684.6	13435	13071.2
ENSMUSG00000062070	12885.7	12919.8	12975.8	14258.8	15877.7	15780
ENSMUSG00000064080	13667.7	13694.1	13897.6	12736.6	13440.7	13660.1
ENSMUSG00000003814	14083.8	14105.3	14070.6	13266.5	12626.5	12521.9
ENSMUSG00000005610	13217.7	13048.2	13174.2	14672.1	13159.3	13514.2
ENSMUSG00000028967	12633.5	12410.6	12746	13541	13579.1	15143.8
ENSMUSG00000063524	12756.5	12866.2	13026.5	13107.5	14425.7	13737.4
ENSMUSG00000039218	13241.3	12823.7	13341.9	13385	12867.5	13378
ENSMUSG00000052837	13345.9	13322.7	12658.7	11609.4	14075.1	13559.3
ENSMUSG00000042429	13377.6	13043.6	12667.4	12250	13471.9	13294.3
ENSMUSG00000029467	12441.9	12414.3	12229.7	13383	12980.6	13599
ENSMUSG00000063229	11342.1	11745.3	12048.8	13054.5	14204.2	14351
ENSMUSG00000027523	12741.1	12507.7	12476.9	12330	13005.9	12736.4
ENSMUSG00000090625	12817	12384.8	12441.1	12239.4	12904.4	12969.2
ENSMUSG00000024661	12660.2	11795.2	11843.5	12182.6	14049.7	13404.8
ENSMUSG00000030730	11327.7	10630	10359	12650.8	14755.5	15458.2
ENSMUSG00000024381	12266.6	12302.5	11909	12112.3	12766	12946.7
ENSMUSG00000037062	12266.6	12086.3	11864.4	12893.6	12322	12779.4
ENSMUSG00000020458	12183.6	11314.7	11148	12836.8	12966.7	13492.8
ENSMUSG00000025809	11756.2	11911.7	12101.2	13072.8	11834.2	12074.5
ENSMUSG00000053931	11728.5	11851.6	12283.8	12410	12135.2	12263.3
ENSMUSG00000032399	11612.7	11672.3	11594.4	12702.9	12288.6	12881.3
ENSMUSG00000064368	12544.3	10901.7	10990.7	12521.7	13197.4	12898.4
ENSMUSG00000037815	11698.8	11594.7	11764.8	12059.3	12211.3	12555.1
ENSMUSG00000027750	11148.4	11474.6	11485.2	13085.3	11675	11920
ENSMUSG00000022816	11679.3	11536.5	12353.7	12143.1	10774.3	11224.8
ENSMUSG00000020908	10642	10302.9	10579.2	12893.6	12516.9	12262.3
ENSMUSG00000021910	11459.9	11571.6	11352.4	11093	11661.2	11644.3
ENSMUSG00000028465	11486.6	11069.9	11049.2	11407	11173.3	11628.2
ENSMUSG00000023942	11634.2	11735.2	11892.4	10631.5	11067.2	10477.1
ENSMUSG00000061723	10867.5	10133.8	10281.2	11440.8	11924.1	12392.1
ENSMUSG00000020372	11162.7	10704	11050.1	10684.5	11596.6	11501.6
ENSMUSG00000022533	11225.2	11476.4	10788	11572.8	10513.6	10781.8
ENSMUSG00000027797	10766.1	10971	10698	12244.3	10607	11046.8
ENSMUSG00000061315	11045.9	10379.6	10816.8	11201.8	11384.4	11632.5
ENSMUSG00000036427	10287.4	10010.9	9928.24	10819.3	12783.3	12500.4
ENSMUSG00000026864	11407.7	11253.8	11917.7	10661.3	10201.1	9895.63
ENSMUSG00000017466	11274.4	11271.3	11471.3	10717.2	9849.31	10156.3
ENSMUSG00000022892	10821.4	10621.7	10636.8	10898.3	11047.6	11084.3
ENSMUSG00000021806	11012	10669.8	10800.2	10456.1	11183.7	10728.1
ENSMUSG00000090066	11312.4	11422.9	11266.8	10724.9	9469.87	10036.2
ENSMUSG00000023456	9666.29	10249.3	10148.4	11067.9	11896.4	11751.6
ENSMUSG00000018707	10780.4	10739.1	10144.1	11418.6	10459.4	10893.3
ENSMUSG00000020315	10064	10284.4	10197.3	11539	11070.7	11257
ENSMUSG00000030096	10497.5	10223.5	10544.2	10929.2	10129.6	10877.3
ENSMUSG00000062825	10764	10365.8	10718.1	9735.49	10657.8	10960.9
ENSMUSG00000021823	10331.5	10395.3	10331.9	10814.5	10353.3	10854.7
ENSMUSG00000037411	10481.1	9620.99	10998.6	10649.8	9969.25	11263.5
ENSMUSG00000028059	10558	10549.6	10602.8	10220.1	10554	10403.1
ENSMUSG00000025428	10134.7	10290	10308.3	10607.4	10709.7	10875.1
ENSMUSG00000020612	10175.7	9893.58	9891.54	11518.8	10527.5	10559.7
ENSMUSG00000026253	10674.8	10184.7	10408.8	9309.65	10798.5	11145.5
ENSMUSG00000021390	10272	9990.61	9959.69	10882	10630.1	9958.93
ENSMUSG00000060600	10147	10606.9	10587.9	9438.75	10228.7	10538.2
ENSMUSG00000024048	10162.4	10336.2	10675.3	9546.65	10554	10261.5
ENSMUSG00000023034	10602.1	9741.12	10861.4	9248.95	9988.86	10541.5
ENSMUSG00000015656	9915.35	9707.85	10251.5	10669.1	9887.37	10215.3
ENSMUSG00000032487	9386.48	9224.59	9410.99	10567.9	10464	11004.9
ENSMUSG00000031207	9500.25	10045.1	9706.31	10867.5	9632.49	9805.51
ENSMUSG00000027864	10006.6	10222.5	9917.75	10141.1	9575.97	9427.88
ENSMUSG00000039952	9969.67	9655.18	9610.2	10031.3	9804.33	10333.3
ENSMUSG00000037487	9594.54	10059	9446.81	10170	9473.33	10060.8
ENSMUSG00000031447	9519.72	9728.18	9941.34	9558.21	9773.19	9750.8
ENSMUSG00000045962	9420.3	8908.57	9090.33	10677.7	9820.48	10467.4
ENSMUSG00000032518	9581.22	9631.16	9619.81	8861.65	10125	10026.5
ENSMUSG00000070436	10108	10026.6	10536.4	9037	9055.83	8627.56
ENSMUSG00000039126	8962.15	9326.23	8515.41	10705.7	9845.85	10490
ENSMUSG00000025130	9479.75	9426.02	9659.13	9593.86	9629.03	9416.08
ENSMUSG00000009214	9827.21	9568.32	9595.35	9025.44	9189.61	9537.31
ENSMUSG00000034088	8928.33	8999.12	9140.13	9989.83	9849.31	9579.15
ENSMUSG00000001864	9082.07	9450.05	9618.06	9200.78	9579.43	9125.35
ENSMUSG00000024991	9182.51	9300.36	9711.55	9838.57	9065.06	8415.15
ENSMUSG00000015647	9408	9769.76	9611.95	8372.23	8943.96	9377.46
ENSMUSG00000098178	6997.32	6489.46	19217.8	5826.84	8415.74	6770.52
ENSMUSG00000003970	9118.97	8969.55	9474.77	8454.12	9778.96	9423.59
ENSMUSG00000034377	8978.55	8968.63	9046.64	9661.3	9078.89	9403.21
ENSMUSG00000035199	9224.54	9441.73	9613.69	8563.95	9130.79	8947.26
ENSMUSG00000008348	8951.9	9700.46	10800.2	6708.38	11487	7227.54
ENSMUSG00000000787	9001.1	9073.05	9030.91	9845.32	8990.09	8700.52
ENSMUSG00000029304	8906.8	8879.92	8674.43	10085.2	9360.3	8720.9
ENSMUSG00000049775	8835.06	9339.17	9840.86	8978.23	8776.73	8094.38
ENSMUSG00000038119	8540.9	8527.87	8751.32	9675.75	8800.95	9456.85
ENSMUSG00000018042	8765.36	8801.38	8945.29	8643.92	9278.42	9078.15
ENSMUSG00000045983	8799.18	8739.47	8858.79	8982.08	8919.74	9044.89
ENSMUSG00000027288	8103.24	8497.37	8167.66	9540.87	9167.7	9189.72
ENSMUSG00000058914	8404.58	8628.59	8522.4	9367.45	8456.1	8805.65
ENSMUSG00000061086	8794.06	8696.97	8973.25	8164.13	8836.7	8618.98
ENSMUSG00000025261	8445.58	8681.26	8374.74	9020.62	8513.77	8895.77
ENSMUSG00000022108	8802.26	8731.15	9000.33	8448.34	8751.35	8100.81
ENSMUSG00000073652	8888.35	9077.67	8783.65	8556.24	7997.09	8379.74
ENSMUSG00000031659	8524.5	8519.55	8706.76	8790.36	8360.38	8841.05
ENSMUSG00000037071	7769.11	7861.64	7777.98	9844.35	8960.1	9338.84
ENSMUSG00000053560	8774.58	8484.44	8660.45	7232.49	9065.06	9040.6
ENSMUSG00000032479	8412.78	8306.1	8269.02	8810.59	8644.1	8565.34
ENSMUSG00000029767	8420.98	8297.78	8455.12	9162.24	8236.98	8137.29
ENSMUSG00000021477	8131.94	8211.85	8253.29	8570.7	9015.46	8580.36
ENSMUSG00000022272	8580.87	8320.89	8360.76	8536.01	8381.14	8240.28
ENSMUSG00000022961	8157.57	8494.6	8379.11	8682.45	8088.2	8426.95
ENSMUSG00000038170	7965.9	7902.3	7379.56	9028.33	8942.8	9269.11
ENSMUSG00000068614	8197.54	8091.73	7826.91	7669.89	9044.3	9558.77
ENSMUSG00000031519	8354.36	8250.66	8637.73	8431	8208.14	8019.28
ENSMUSG00000027253	7904.4	8296.86	8425.42	8283.59	8167.78	8588.94
ENSMUSG00000029860	8740.76	8292.24	8620.26	7809.58	8032.84	8067.56
ENSMUSG00000022477	7942.33	7998.4	7783.22	8088.02	8904.74	9060.98
ENSMUSG00000001473	8122.72	8150.86	7894.19	7812.47	8663.7	9004.12
ENSMUSG00000015837	8284.66	8423.45	8462.11	7682.41	8247.35	8222.04
ENSMUSG00000022519	7580.52	7847.78	7433.73	9039.89	8415.74	8936.53
ENSMUSG00000030592	7868.53	7784.95	7459.07	8497.48	8398.44	9253.01
ENSMUSG00000043716	7842.91	7754.46	7983.31	8144.86	8657.93	8621.13
ENSMUSG00000024937	7866.48	7845.93	8030.49	8365.48	8240.43	8461.28
ENSMUSG00000018474	8110.42	8394.81	8524.15	7812.47	7692.61	7684.56
ENSMUSG00000031701	8039.7	7710.1	7807.69	8353.92	8108.96	8168.4
ENSMUSG00000031320	7305.83	7311.84	7741.28	8442.56	8550.68	8729.48
ENSMUSG00000062078	8365.63	8197.07	8023.5	8333.69	7414.66	7409.92
ENSMUSG00000018893	7214.61	7093.77	7123.55	7798.02	9168.85	9822.68
ENSMUSG00000023175	8007.92	7681.46	7761.38	7170.83	8656.78	8342.2
ENSMUSG00000000957	8130.92	8136.08	8887.62	7314.38	7175.93	7404.56
ENSMUSG00000024576	7877.75	7875.5	7623.33	8025.39	7896.75	7898.05
ENSMUSG00000006932	7794.73	7963.29	8079.42	8106.32	7508.08	7592.3
ENSMUSG00000028063	8425.08	8478.89	8224.46	7060.03	7506.93	7256.51
ENSMUSG00000023022	7690.19	7626.94	7792.83	8130.41	7738.74	7953.84
ENSMUSG00000038400	8178.06	7999.32	8093.4	7382.78	7255.5	7522.57
ENSMUSG00000039542	7513.9	7658.36	7297.43	8014.8	7953.26	8227.4
ENSMUSG00000024359	7493.4	7772.01	7814.68	7972.4	7946.34	7497.89
ENSMUSG00000033565	7776.28	7680.53	7194.32	7900.15	7737.59	8213.46
ENSMUSG00000024940	7940.28	7909.69	7836.52	6932.86	7767.58	8014.99
ENSMUSG00000055322	7575.39	7371.91	7901.18	7801.88	7576.13	8034.3
ENSMUSG00000007892	7614.34	7872.73	7826.91	6934.79	8055.9	7594.45
ENSMUSG00000031751	7912.6	7429.2	7410.14	7700.72	7609.57	7737.13
ENSMUSG00000071415	7457.53	7465.23	7258.11	7781.64	7948.65	7657.74
ENSMUSG00000093674	7639.97	7598.29	7996.41	6710.31	7644.17	7842.27
ENSMUSG00000023036	7733.24	7790.49	7670.51	7634.24	7076.74	7344.48
ENSMUSG00000036550	7548.75	7319.24	7191.7	7861.61	7393.9	7529
ENSMUSG00000057738	7272.01	7490.18	7651.29	7716.13	7122.87	7254.36
ENSMUSG00000020849	7278.16	7245.31	7354.22	7691.08	7450.41	7618.05
ENSMUSG00000025151	7490.32	7544.7	7216.17	7231.52	7598.04	7468.93
ENSMUSG00000061462	7229.99	7303.53	7144.52	7064.85	7630.33	8211.31
ENSMUSG00000017774	7510.82	7261.02	7440.72	7371.22	7072.13	7715.67
ENSMUSG00000020241	7782.43	7552.09	7626.82	6982	7333.93	6960.41
ENSMUSG00000008682	6897.9	7005.07	7389.17	7594.74	7816.02	7668.47
ENSMUSG00000013076	7255.61	7180.63	6960.16	7430.96	7776.8	7547.24
ENSMUSG00000063077	7078.29	7257.33	7084.23	7484.91	7352.38	7485.02
ENSMUSG00000060147	6772.86	6957.94	6797.65	7643.87	7655.7	7631.99
ENSMUSG00000031799	7289.43	6912.66	7303.54	7454.08	6941.8	7203.94
ENSMUSG00000020585	7104.94	7042.03	7292.18	7364.48	7118.26	6853.13
ENSMUSG00000071866	7084.44	7147.37	7319.27	7340.39	6669.62	7076.28
ENSMUSG00000058655	6781.06	6403.52	6646.49	7486.83	8054.75	7581.57
ENSMUSG00000083773	7361.18	6701.99	6829.98	6358.65	8068.59	7624.48
ENSMUSG00000050315	7379.63	7584.43	7646.04	6679.48	6633.87	6535.58
ENSMUSG00000022261	7045.5	6771.29	7245.87	7628.46	7213.98	6704.01
ENSMUSG00000066036	7066	7098.39	6927.84	7230.56	6848.38	7365.94
ENSMUSG00000032737	7445.23	7072.52	6949.68	6573.5	7160.93	7398.12
ENSMUSG00000026074	7072.14	7146.44	7225.78	7174.68	6938.34	6898.19
ENSMUSG00000021701	7326.33	7439.36	7648.67	6522.44	6771.11	6304.92
ENSMUSG00000022462	6986.05	6839.67	7192.58	7303.78	6633.87	7026.93
ENSMUSG00000059796	6875.35	7155.68	7059.77	7147.71	6640.79	6925.01
ENSMUSG00000024620	6832.31	6814.72	7148.89	6945.39	6971.79	7173.9
ENSMUSG00000029761	6924.55	6845.21	7219.66	7805.73	6411.28	6480.86
ENSMUSG00000001911	7314.03	7082.69	6899.88	6463.67	6704.22	7134.21
ENSMUSG00000020048	7102.89	6835.05	7035.31	7161.19	6833.39	6540.94
ENSMUSG00000000555	6823.08	6669.64	6905.12	6876.02	6839.16	7400.27
ENSMUSG00000024393	7250.49	6733.4	7250.24	6534.96	6666.16	6986.16
ENSMUSG00000022884	6520.72	6858.15	6648.24	7305.71	7103.27	7068.77
ENSMUSG00000058355	6849.73	6727.86	6793.28	7215.15	6795.33	6725.47
ENSMUSG00000035247	6633.47	6922.83	6549.51	7052.33	6684.61	6770.52
ENSMUSG00000060036	6477.67	6525.5	6342.43	6983.92	6991.39	7215.74
ENSMUSG00000063870	6841.53	6474.67	6632.51	6746.92	6716.91	6904.63
ENSMUSG00000005417	6858.96	6631.76	6531.16	6699.71	6787.26	6782.33
ENSMUSG00000071984	6597.59	6640.08	6681.44	6793.16	6620.03	6710.45
ENSMUSG00000032803	6986.05	6867.39	7053.65	6394.3	6038.76	6507.69
ENSMUSG00000016487	6600.67	6543.98	6488.35	7090.86	6455.1	6529.14
ENSMUSG00000042254	6400.8	6254.76	6510.19	6514.73	7009.85	7127.77
ENSMUSG00000022283	6419.25	6172.52	6374.76	6922.26	6919.89	6904.63
ENSMUSG00000035530	6802.58	6407.22	6636.88	6435.73	6611.95	6486.23
ENSMUSG00000075307	6785.16	6771.29	6785.42	6007	6678.85	6314.58
ENSMUSG00000029614	6253.21	6329.6	6653.48	6224.74	7068.67	6833.82
ENSMUSG00000026234	6329.06	6383.2	6497.96	7163.12	6540.45	6264.16
ENSMUSG00000028452	6451.03	6365.64	6468.25	6869.27	6474.71	6535.58
ENSMUSG00000057193	6355.71	6507.02	6336.32	6508.95	6718.06	6763.01
ENSMUSG00000037242	6325.98	6453.42	6359.03	6985.85	6336.31	6499.1
ENSMUSG00000024236	6331.11	6416.46	6364.28	6630.34	6628.1	6649.3
ENSMUSG00000038393	6864.08	7215.75	6906.87	5439.54	6470.1	5928.37
ENSMUSG00000022419	6261.41	6108.76	6019.15	7343.28	6322.47	6950.76
ENSMUSG00000058558	6200.94	6332.37	6254.19	6626.49	6724.98	6882.1
ENSMUSG00000042406	6656.02	6449.73	6944.44	6207.4	6427.42	6164.39
ENSMUSG00000021546	6548.4	6593.87	6639.5	6553.27	6163.31	6323.16
ENSMUSG00000017707	6255.26	6762.05	6609.8	6744.03	6328.24	6090.36
ENSMUSG00000009575	6116.89	6233.5	6043.62	7207.44	6487.4	6808.07
ENSMUSG00000047675	6540.2	6306.5	6454.27	6427.06	6638.48	6455.12
ENSMUSG00000039262	6430.53	6441.41	6305.74	6559.05	6347.85	6627.84
ENSMUSG00000033161	6105.62	6158.66	6239.33	6592.77	6763.04	6883.17
ENSMUSG00000021133	6776.96	6761.12	6663.97	6029.16	6255.58	6009.9
ENSMUSG00000031696	6097.42	6221.49	6117.88	6892.4	6513.92	6789.84
ENSMUSG00000020368	6202.99	6087.51	6290.01	7054.25	6545.06	6382.17
ENSMUSG00000006740	6422.33	6546.75	6338.07	6863.49	6338.62	5925.15
ENSMUSG00000036333	6193.76	6366.56	6292.63	6638.05	6407.82	6430.44
ENSMUSG00000040225	6248.09	6227.03	6363.4	6691.04	6156.39	6588.15
ENSMUSG00000061689	6740.06	6821.19	6928.71	5857.67	5740.05	5954.11
ENSMUSG00000020044	5955.98	6004.34	6149.34	7157.34	6289.03	6586
ENSMUSG00000042613	6333.16	6349.01	6305.74	6222.81	6405.51	6437.95
ENSMUSG00000019505	6621.17	6234.43	6224.48	6062.88	6503.54	6290.98
ENSMUSG00000052727	6075.89	6148.49	6053.23	6688.15	6245.2	6667.53
ENSMUSG00000000631	6291.13	6125.39	6277.78	6171.75	6402.05	6554.89
ENSMUSG00000031636	6294.21	6059.79	6025.27	5726.64	6632.71	7134.21
ENSMUSG00000036990	6175.31	6191	5990.32	6810.5	6185.23	6353.2
ENSMUSG00000035105	6011.32	6081.04	5643.45	6054.21	7067.51	7079.49
ENSMUSG00000026879	6351.61	6332.37	6457.77	6131.28	6244.05	6093.58
ENSMUSG00000021756	6232.71	6251.06	5880.23	6334.57	6344.39	6505.54
ENSMUSG00000032511	6212.21	6398.9	6179.92	6154.41	5917.66	6451.9
ENSMUSG00000020821	6215.29	6189.15	6123.13	6214.14	6196.76	6201.93
ENSMUSG00000021614	6543.27	6449.73	6242.83	6340.35	5616.64	5786.75
ENSMUSG00000031708	6255.26	6130.01	5890.71	5901.99	6508.16	6533.43
ENSMUSG00000022817	6011.32	5868.51	6186.04	6000.26	6313.25	6704.01
ENSMUSG00000032531	6284.98	6376.73	6108.27	5789.27	6308.63	6133.27
ENSMUSG00000017817	6420.28	6312.97	5945.76	5915.48	6231.36	6184.77
ENSMUSG00000050335	6092.29	6204.86	6374.76	5519.51	6408.97	6356.42
ENSMUSG00000031010	5853.48	6104.14	5718.59	6659.25	6097.58	6378.95
ENSMUSG00000024608	5903.7	6094.9	6299.62	5736.28	6422.81	6287.76
ENSMUSG00000021134	6102.54	5819.54	6099.54	6513.77	6212.91	5905.84
ENSMUSG00000006457	6189.66	6251.98	5850.52	6058.06	6059.52	6181.55
ENSMUSG00000019818	5803.26	5674.46	5740.43	6404.9	6395.13	6581.71
ENSMUSG00000022010	5741.76	5582.06	5720.34	6128.39	6563.52	6666.46
ENSMUSG00000026219	5904.73	6039.46	5937.02	6423.2	5782.72	6091.43
ENSMUSG00000087400	6628.34	6285.25	6359.91	5025.26	5660.47	6081.78
ENSMUSG00000050912	6106.64	6191.92	6207.01	6276.76	5696.22	5409.12
ENSMUSG00000098816	5275.41	5313.17	5297.45	6408.75	7283.18	6671.83
ENSMUSG00000030103	5529.6	5760.4	5845.28	6181.38	6378.98	6240.55
ENSMUSG00000031097	5935.48	5644.9	5537.73	5777.71	6272.88	6786.62
ENSMUSG00000058546	6013.37	5865.74	5997.31	5591.76	6210.6	6053.89
ENSMUSG00000099143	5517.3	5590.38	5343.76	5820.1	7053.67	6651.44
ENSMUSG00000062647	5886.28	5766.87	5957.12	5598.51	6274.03	6043.16
ENSMUSG00000024335	5963.15	5717.89	5940.52	5998.33	5903.82	5909.06
ENSMUSG00000036390	6115.87	5767.79	6055.85	5340.31	6465.48	5759.93
ENSMUSG00000005125	5542.92	5398.18	5332.4	6046.5	7040.99	6233.05
ENSMUSG00000049470	5816.58	5824.16	5683.64	6347.09	5758.5	5856.49
ENSMUSG00000001924	5913.95	5806.6	5598.89	5896.21	5926.89	6090.36
ENSMUSG00000045128	5877.05	5910.09	5813.83	4934.7	6218.67	6506.61
ENSMUSG00000026796	5651.57	5898.08	5623.35	5771.92	6087.2	5914.42
ENSMUSG00000004980	5802.23	5646.74	5845.28	6337.46	5584.35	5513.19
ENSMUSG00000078429	5850.41	6051.47	5929.16	5699.67	5563.59	5589.36
ENSMUSG00000025132	5886.28	5721.59	6091.67	5401.97	5666.24	5960.55
ENSMUSG00000036606	5895.5	5755.78	5780.62	5625.48	5812.71	5896.18
ENSMUSG00000031565	5737.66	5700.34	5579.66	5650.53	6091.81	6052.81
ENSMUSG00000030557	5905.75	6057.94	5783.24	6034.94	5415.97	5302.92
ENSMUSG00000005161	5661.82	6102.29	6100.41	5471.33	5721.6	5456.33
ENSMUSG00000027422	5583.92	5477.65	5784.12	5919.33	6030.68	5768.52
ENSMUSG00000039630	5763.29	5534.94	5781.5	6070.59	5753.89	5577.56
ENSMUSG00000033684	5886.28	5710.5	6025.27	5409.67	5628.18	5711.66
ENSMUSG00000020850	5676.16	5565.43	5556.95	5733.39	5839.23	5675.18
ENSMUSG00000038900	5742.79	5722.51	5875.86	5301.77	5432.11	5736.33
ENSMUSG00000047215	5460.93	5740.07	5591.02	5372.1	5888.83	5800.7
ENSMUSG00000044033	5390.2	5299.31	5158.52	6012.78	5930.35	6052.81
ENSMUSG00000028173	5560.35	5680.01	5550.83	5779.63	5666.24	5376.94
ENSMUSG00000018340	5369.71	5127.44	5316.67	5747.84	5931.5	6033.5
ENSMUSG00000033149	5335.88	5312.25	5269.49	6243.04	5647.78	5616.18
ENSMUSG00000053617	5222.11	5467.48	5397.93	5901.99	5587.81	5817.87
ENSMUSG00000031962	6077.94	5888.84	5978.96	4873.04	5095.35	5162.38
ENSMUSG00000068823	5261.06	5384.32	5156.78	6107.2	5704.3	5587.21
ENSMUSG00000022952	5445.55	5680.93	5592.77	5638.97	5202.6	5281.46
ENSMUSG00000015143	5460.93	5288.22	5569.18	5618.74	5359.45	5469.2
ENSMUSG00000062328	5318.46	5103.41	5358.61	5348.98	6021.46	5710.59
ENSMUSG00000016534	5317.43	5510.91	5296.57	5841.29	5257.96	5470.27
ENSMUSG00000055538	5318.46	5296.54	5300.07	5658.24	5459.79	5615.1
ENSMUSG00000055065	5365.61	5599.62	5432.88	5410.64	5336.39	5355.48
ENSMUSG00000006998	5181.11	5342.74	5394.43	5592.73	5448.26	5382.3
ENSMUSG00000037933	5387.13	5217.99	5215.32	5526.25	5355.99	5512.11
ENSMUSG00000006356	5776.61	5366.76	5887.22	4704.44	5343.31	5026.13
ENSMUSG00000061983	5388.15	5206.91	5474.82	5097.52	5473.63	5558.25
ENSMUSG00000070047	5323.58	5358.45	5048.43	5818.17	5146.09	5437.02
ENSMUSG00000020695	5588.02	5295.61	5203.96	5111.97	5459.79	5476.71
ENSMUSG00000034101	5399.43	5249.41	5134.06	5706.41	5135.71	5404.83
ENSMUSG00000020422	5430.18	5120.05	5358.61	5434.72	5307.56	5322.23
ENSMUSG00000064356	5058.12	4948.18	4432.45	6537.85	5752.73	5367.28
ENSMUSG00000028788	5191.36	5380.62	5117.46	5587.91	5320.24	5288.97
ENSMUSG00000037706	5251.84	5383.4	5135.81	5144.73	5607.42	5400.54
ENSMUSG00000023951	5240.56	5120.97	4957.57	5496.38	5614.34	5517.48
ENSMUSG00000056201	5428.13	5223.54	5630.34	5242.04	5109.19	5078.7
ENSMUSG00000020580	5086.82	5307.63	5060.67	5773.85	5217.6	5288.97
ENSMUSG00000006205	5653.62	5224.46	5769.26	4551.26	5165.7	5150.58
ENSMUSG00000022285	5040.7	5262.35	5015.23	5560.93	5360.61	5361.92
ENSMUSG00000028495	5084.77	4946.33	5163.77	5288.28	5651.24	5470.27
ENSMUSG00000097554	5184.19	4886.27	5238.91	5554.19	5278.72	5358.7
ENSMUSG00000001020	5117.57	5171.79	5827.8	5508.91	5078.05	4598.08
ENSMUSG00000047126	5060.17	4939.86	5120.95	5740.13	5346.77	5243.91
ENSMUSG00000038375	5140.12	5053.52	5110.47	5260.34	5254.5	5631.2
ENSMUSG00000037868	4909.5	4620.15	4941.84	5395.22	5763.11	5854.34
ENSMUSG00000025278	5081.69	5296.54	4923.49	5315.26	5241.82	5384.45
ENSMUSG00000022255	5356.38	5266.04	5252.89	5378.84	5006.54	4854.48
ENSMUSG00000019877	5150.37	5450.85	5155.03	5189.05	5123.02	5042.22
ENSMUSG00000064179	5238.51	5146.84	5035.33	5129.31	5224.52	5402.69
ENSMUSG00000057236	5057.1	5064.61	5114.84	5486.75	5052.67	5329.74
ENSMUSG00000027763	5103.22	5225.39	4877.18	5636.08	5125.33	5080.84
ENSMUSG00000028849	5727.41	5089.55	5209.2	4689.99	5012.31	5244.98
ENSMUSG00000048076	5239.54	5215.22	5455.59	4945.3	5016.92	4974.64
ENSMUSG00000025794	4908.48	5030.42	4908.64	5197.72	5389.44	5514.26
ENSMUSG00000016559	5227.24	5336.27	5254.64	5015.63	5063.05	4765.44
ENSMUSG00000020460	4780.36	5061.83	4958.44	5008.89	5427.5	5564.68
ENSMUSG00000031299	4866.46	5064.61	4976.79	5548.41	5078.05	5149.5
ENSMUSG00000096210	5375.85	5400.03	5589.28	4763.21	4840.46	4544.44
ENSMUSG00000005397	5117.57	4922.3	4731.27	5188.08	5377.91	5413.42
ENSMUSG00000022463	5411.73	5256.8	5189.98	4725.64	4973.09	4987.51
ENSMUSG00000026553	5064.27	5177.34	4902.52	5064.76	4992.7	5325.45
ENSMUSG00000039376	5312.31	5229.08	5485.3	4924.1	4692.84	4701.07
ENSMUSG00000017291	5109.37	5253.11	5075.52	5504.09	4749.35	4678.54
ENSMUSG00000018293	5531.65	5342.74	5425.01	4567.63	4726.28	4705.36
ENSMUSG00000024593	4740.39	4549	4202.66	5744.95	5448.26	5956.26
ENSMUSG00000023885	5264.14	5060.91	5220.56	4830.65	5061.9	4908.12
ENSMUSG00000037805	5033.52	5044.28	5245.02	4654.34	5138.02	5258.93
ENSMUSG00000028381	4985.35	4766.14	4918.25	5656.31	5088.43	4942.45
ENSMUSG00000025982	4962.8	4974.97	5145.42	5279.61	4930.42	4939.23
ENSMUSG00000025085	4949.48	5017.48	4929.61	5313.33	5027.3	4954.25
ENSMUSG00000050708	5035.57	4995.3	5200.46	4694.81	5168	4933.87
ENSMUSG00000063457	5209.81	4983.29	5195.22	4468.4	5166.85	4980
ENSMUSG00000027828	4904.38	4822.51	4708.55	5362.47	5133.4	5051.88
ENSMUSG00000035268	5016.1	5034.11	5238.91	4623.51	4835.85	5106.59
ENSMUSG00000083840	4870.56	4782.78	4968.05	5325.86	4872.76	5044.37
ENSMUSG00000027878	5054.02	5140.38	5212.7	4581.12	4971.94	4873.79
ENSMUSG00000042828	4982.27	4857.62	4757.48	4830.65	5264.88	5280.39
ENSMUSG00000037035	5218.01	5339.97	5477.44	4621.59	4532.53	4494.01
ENSMUSG00000002602	5026.35	5084.01	4989.89	5131.24	4735.51	4815.86
ENSMUSG00000009291	4926.93	5158.86	4959.31	4840.29	5000.77	4884.52
ENSMUSG00000033065	4751.66	4317.99	4228	5049.35	5778.11	5845.76
ENSMUSG00000057841	4838.78	4780.93	4778.45	4996.36	5276.42	4982.14
ENSMUSG00000054452	5082.72	4946.33	4831.75	4567.63	4978.86	5091.57
ENSMUSG00000090841	5064.27	5063.68	5519.38	4479	4685.92	4412.48
ENSMUSG00000019916	4590.74	4523.12	4631.66	5273.83	5291.41	5164.52
ENSMUSG00000005469	4678.89	4451.97	4602.83	5015.63	5278.72	5324.37
ENSMUSG00000029135	4527.2	4638.63	4779.32	5140.88	5084.97	5075.48
ENSMUSG00000054364	5330.76	5145.92	5138.43	4389.4	4511.77	4573.4
ENSMUSG00000028348	4784.46	4617.38	4662.24	5211.21	4871.6	5079.77
ENSMUSG00000026880	4742.44	5014.71	4809.9	4754.54	4823.16	4963.91
ENSMUSG00000025290	4681.96	4581.34	4811.65	4780.55	5157.62	5054.02
ENSMUSG00000058600	4790.61	4519.43	4769.71	4782.48	5201.45	5019.69
ENSMUSG00000062270	4627.64	4790.17	4880.68	4976.13	4983.47	4722.52
ENSMUSG00000018339	4562.05	4441.81	4411.48	4978.06	5448.26	5239.62
ENSMUSG00000036103	4745.51	4809.57	4899.9	4733.34	5043.45	4643.14
ENSMUSG00000021270	4846.98	4768.92	4759.23	5228.55	4561.36	4613.1
ENSMUSG00000020614	5086.82	4974.05	5213.57	4507.9	4504.85	4397.46
ENSMUSG00000061353	5078.62	5159.78	5189.98	4557.04	4444.88	4152.86
ENSMUSG00000021143	4596.89	4528.67	4608.07	4860.52	5229.13	4903.83
ENSMUSG00000021824	4732.19	4594.27	4683.21	5183.27	4544.06	4813.71
ENSMUSG00000002265	4393.95	4500.95	4293.53	4948.19	5226.82	5253.57
ENSMUSG00000034457	4920.78	5032.26	4896.4	4437.57	4659.39	4432.86
ENSMUSG00000023010	4913.6	4804.03	4671.85	4619.66	4699.76	4699.99
ENSMUSG00000022665	4595.87	4655.26	4995.14	4996.36	4583.27	4431.79
ENSMUSG00000032855	4846.98	5065.53	4863.2	4597.5	4284.56	4573.4
ENSMUSG00000024012	4824.43	4851.15	5035.33	4297.87	4644.4	4557.31
ENSMUSG00000074129	4627.64	4776.31	4666.61	4398.07	4880.83	4961.76
ENSMUSG00000010277	4664.54	4488.01	4613.31	4951.08	4510.61	4991.8
ENSMUSG00000030409	4885.93	4705.16	4780.2	4064.72	4812.78	4993.95
ENSMUSG00000020722	5158.57	5239.25	5127.94	3813.27	4326.08	4291.25
ENSMUSG00000023004	3831.26	4781.85	4587.1	4863.41	5336.39	4728.96
ENSMUSG00000032562	4841.86	4485.24	4770.59	4238.14	5035.37	4719.31
ENSMUSG00000060743	4673.77	4941.71	4656.13	4430.83	4717.06	4551.95
ENSMUSG00000038708	4640.97	4487.09	4587.1	4893.27	4502.54	4844.82
ENSMUSG00000094483	4791.63	4895.51	4779.32	4973.24	4157.7	4142.13
ENSMUSG00000022367	4288.38	4120.25	4594.09	5398.11	4485.24	4919.92
ENSMUSG00000022505	4450.33	4498.18	4453.42	4645.67	4805.86	4942.45
ENSMUSG00000019437	4534.37	4588.73	4665.74	4498.27	4634.02	4748.27
ENSMUSG00000039844	4446.23	4336.47	4150.24	4580.16	5105.73	5137.7
ENSMUSG00000055932	4626.62	4469.53	4414.98	4678.43	4571.74	4820.15
ENSMUSG00000063011	4351.93	4552.69	4417.6	4598.46	4681.31	4927.43
ENSMUSG00000029683	4727.06	4577.64	4594.97	4243.92	4570.59	4695.7
ENSMUSG00000003847	4409.33	4544.38	4317.12	5367.28	4211.91	4489.72
ENSMUSG00000055053	4612.27	4522.2	4280.42	4273.79	4788.56	4982.14
ENSMUSG00000003226	4651.22	4704.23	4404.49	4926.99	4311.09	4282.67
ENSMUSG00000038733	4376.53	4482.47	4395.76	4913.51	4530.22	4575.55
ENSMUSG00000035242	4690.16	4524.97	4775.83	4098.44	4567.13	4553.02
ENSMUSG00000031672	4525.15	4232.98	4135.38	4493.45	4981.17	5018.62
ENSMUSG00000022708	4274.04	4492.63	4191.3	5068.62	4351.46	4853.41
ENSMUSG00000061904	4439.05	4325.38	4574.87	4494.41	4681.31	4708.58
ENSMUSG00000030744	4410.35	4504.64	4407.11	4505.01	4768.96	4606.66
ENSMUSG00000009470	4373.46	4789.24	4210.52	4696.73	4564.82	4432.86
ENSMUSG00000000740	4726.04	4585.03	4483.13	4092.66	4516.38	4644.21
ENSMUSG00000005198	4511.82	4528.67	4620.3	4522.35	4361.84	4402.83
ENSMUSG00000033307	4401.13	4441.81	4588.85	3848.91	5000.77	4725.74
ENSMUSG00000052684	4853.13	4701.46	4643.02	3896.12	4358.38	4424.28
ENSMUSG00000028692	4327.33	4512.04	4762.72	4379.76	4442.57	4422.14
ENSMUSG00000048612	4410.35	4576.72	4443.81	4906.76	4198.07	4223.67
ENSMUSG00000062929	4341.68	4402.08	4384.4	4868.22	4552.13	4280.52
ENSMUSG00000028557	4370.38	4565.63	4323.24	4728.53	4390.67	4384.59
ENSMUSG00000002900	4524.12	4599.82	4234.99	4429.86	4403.36	4549.8
ENSMUSG00000040785	4158.22	4191.4	4281.3	4941.45	4675.54	4527.27
ENSMUSG00000004044	4584.59	4463.99	4416.72	4485.74	4377.98	4366.35
ENSMUSG00000036698	4431.88	4363.27	4138.88	4692.88	4457.56	4662.45
ENSMUSG00000031503	4206.39	4037.08	4058.49	4722.75	4837	4953.18
ENSMUSG00000021282	4499.52	4309.67	4636.03	4656.27	4324.93	4151.79
ENSMUSG00000022403	4157.19	4226.51	4356.44	4875.93	4627.1	4365.28
ENSMUSG00000017760	4329.38	4448.28	4445.56	4258.37	4516.38	4608.81
ENSMUSG00000036371	4588.69	4560.09	4507.59	4337.37	4399.9	4083.13
ENSMUSG00000059263	4438.03	4353.1	4276.93	4521.39	4435.65	4511.18
ENSMUSG00000000753	4385.75	4433.49	4333.72	4430.83	4454.1	4471.49
ENSMUSG00000049517	4157.19	4423.33	4317.99	4299.8	4698.6	4638.84
ENSMUSG00000020393	4093.64	4168.3	4360.81	4450.09	4659.39	4753.64
ENSMUSG00000024073	4550.77	4544.38	4236.74	4564.74	4093.11	4291.25
ENSMUSG00000055204	4186.91	4463.99	4330.22	4545.47	4442.57	4311.64
ENSMUSG00000030057	4472.88	4722.71	4597.59	4053.16	4269.57	4027.34
ENSMUSG00000020361	4455.45	4500.95	4479.63	4296.91	4214.21	4206.5
ENSMUSG00000073702	4242.26	4321.69	4305.76	4222.72	4592.5	4545.51
ENSMUSG00000079523	4431.88	4518.5	4704.18	4086.88	4409.12	3909.33
ENSMUSG00000014867	4355.01	4308.75	4329.35	4346.04	4396.44	4378.15
ENSMUSG00000020841	4225.86	4244.07	4237.61	4688.06	4202.68	4438.23
ENSMUSG00000039910	4648.14	4413.16	4698.94	3764.13	4148.47	4266.58
ENSMUSG00000017404	4430.85	4193.25	4424.59	4085.92	4343.38	4459.68
ENSMUSG00000026276	4176.67	4099.92	4126.64	4913.51	4377.98	4145.35
ENSMUSG00000030516	4290.43	4360.49	4317.12	4614.84	3932.8	4230.1
ENSMUSG00000027447	4169.49	4225.59	4476.14	4082.06	4373.37	4469.34
ENSMUSG00000018770	4273.01	4236.67	4227.12	4164.92	4512.92	4348.11
ENSMUSG00000064352	4104.92	4220.04	3614.64	4647.6	4577.51	4696.78
ENSMUSG00000074934	3989.1	4162.75	4144.99	4809.46	4275.34	4225.81
ENSMUSG00000039105	4335.53	4557.31	4696.32	4025.22	3835.93	3800.98
ENSMUSG00000038014	4191.01	4198.79	4203.53	4395.18	4149.63	4233.32
ENSMUSG00000004040	4011.65	4181.23	4057.62	4521.39	4132.33	4489.72
ENSMUSG00000054808	4162.32	4174.77	4526.82	4023.29	4154.24	4190.41
ENSMUSG00000021709	4188.96	4237.6	3944.91	4516.57	4145.01	4242.98
ENSMUSG00000034160	4331.43	4222.81	4132.76	4556.07	4025.07	3939.37
ENSMUSG00000020745	4085.44	4354.95	4115.29	4419.27	4138.09	4049.87
ENSMUSG00000034993	4239.19	4219.12	4183.44	3967.42	4399.9	4190.41
ENSMUSG00000027248	4069.05	4086.06	4343.33	4595.57	4057.36	3906.11
ENSMUSG00000020029	4235.09	4033.39	4257.71	4332.56	4136.94	4017.69
ENSMUSG00000001440	4036.25	4211.73	4005.2	4447.2	4164.62	4135.7
ENSMUSG00000043733	4116.19	4098.99	4140.62	4301.73	4006.62	4315.93
ENSMUSG00000018501	4048.55	4038.93	4198.29	4337.37	4043.52	4276.23
ENSMUSG00000034243	4127.47	4017.68	4062.86	4316.18	4189.99	4200.06
ENSMUSG00000069117	4053.67	4090.68	4094.32	3942.37	4484.09	4252.63
ENSMUSG00000038664	4074.17	4316.14	4048.88	4231.4	3967.4	4077.76
ENSMUSG00000006699	4059.82	4256.08	4057.62	4413.48	3954.72	3911.48
ENSMUSG00000023055	4123.37	4149.82	4202.66	3952	4196.91	4078.84
ENSMUSG00000048578	4120.29	4084.21	4099.56	4158.17	4195.76	4021.98
ENSMUSG00000013236	4300.68	4231.13	4011.31	3899.97	3989.32	4197.92
ENSMUSG00000007817	4222.79	3962.24	4233.24	3951.04	4014.69	4220.45
ENSMUSG00000029823	4013.7	3899.4	3798.12	4517.54	4223.44	4192.55
ENSMUSG00000036275	4002.42	4097.15	4028.79	4296.91	4060.82	4060.6
ENSMUSG00000062353	3992.17	4144.27	4162.47	3789.18	4219.98	4227.96
ENSMUSG00000068039	3873.28	4011.21	3964.13	4305.58	4233.82	4151.79
ENSMUSG00000038274	4154.12	4135.03	4191.3	3577.23	4372.22	4113.17
ENSMUSG00000021253	4094.67	3881.85	3859.28	3935.62	4362.99	4376.01
ENSMUSG00000020592	4277.11	3979.79	4155.48	3889.38	4022.76	4041.29
ENSMUSG00000052146	4031.12	3916.96	4147.61	3919.24	4232.67	4147.5
ENSMUSG00000097346	3829.21	4107.31	4147.61	3757.39	4467.94	4038.07
ENSMUSG00000038271	4229.96	4231.13	4108.3	3664.9	3984.7	4058.45
ENSMUSG00000001419	3996.27	3986.26	4143.25	3704.4	4229.21	4251.56
ENSMUSG00000019820	3787.18	4045.4	3820.84	4325.81	3978.94	4309.49
ENSMUSG00000031508	4180.77	4319.84	4001.7	3767.98	3794.41	4100.29
ENSMUSG00000031446	3980.9	3924.35	3909.09	4246.81	4116.18	4044.51
ENSMUSG00000028234	3799.48	3985.34	4004.32	3936.59	4312.24	4193.63
ENSMUSG00000031502	3816.91	3610.18	3752.69	4347.97	4298.4	4459.68
ENSMUSG00000032959	4115.17	4021.38	4134.51	3745.83	4048.14	4064.89
ENSMUSG00000038612	4034.2	3944.68	4132.76	4097.48	3905.12	3968.34
ENSMUSG00000031791	3752.34	3636.98	3690.65	4040.64	4660.55	4475.78
ENSMUSG00000022265	4173.59	3923.43	3892.48	4109.04	4093.11	3890.02
ENSMUSG00000055302	4239.19	3968.71	3956.27	4092.66	3897.05	3880.37
ENSMUSG00000036181	4427.78	4402.08	4174.7	3295.9	4041.22	3644.35
ENSMUSG00000021242	4005.5	3852.28	3872.39	4049.31	4262.65	4004.81
ENSMUSG00000035325	3950.15	3868.91	3932.68	4077.25	4000.85	4086.35
ENSMUSG00000003316	3741.06	4092.53	3953.65	4174.55	3840.54	4042.36
ENSMUSG00000032741	3944	3908.64	3701.14	3770.88	4336.46	4340.6
ENSMUSG00000032194	3918.38	3935.44	3981.61	4051.23	3989.32	3987.65
ENSMUSG00000033060	3958.35	3704.43	3820.84	4078.21	4124.25	4232.25
ENSMUSG00000019970	3600.64	3613.88	3560.47	4264.15	4493.31	4469.34
ENSMUSG00000078578	4072.12	4042.63	3959.76	4223.69	3643.32	3811.71
ENSMUSG00000004056	3836.38	3735.85	3813.85	3955.85	4118.49	4356.69
ENSMUSG00000068566	4030.1	3691.5	3811.23	4109.04	3980.09	4141.06
ENSMUSG00000031715	3931.7	3965.93	3855.79	4221.76	3953.56	3765.57
ENSMUSG00000043252	4030.1	4040.78	3926.56	4032.93	3789.79	3835.31
ENSMUSG00000030655	3871.23	4037.08	3568.33	4394.22	3769.03	4030.56
ENSMUSG00000030738	3992.17	3926.2	4076.84	3723.67	3996.24	3916.84
ENSMUSG00000022234	3939.9	3789.44	4041.02	3966.45	4021.61	3879.29
ENSMUSG00000059291	3957.33	3992.73	3847.05	3682.24	4003.16	4193.63
ENSMUSG00000029478	4152.07	3923.43	4029.66	3564.7	3822.09	4137.84
ENSMUSG00000025967	3866.11	3839.34	3826.08	4092.66	4141.55	3891.09
ENSMUSG00000028364	3901.98	3757.1	4239.36	4043.53	3557.98	4018.76
ENSMUSG00000031691	3837.41	3911.42	3923.07	3951.04	3917.81	4029.49
ENSMUSG00000029718	3977.83	4009.36	4224.5	3608.05	3784.03	3884.66
ENSMUSG00000003617	4007.55	4216.35	4142.37	4136.02	3509.54	3347.18
ENSMUSG00000022263	4245.34	4025.07	3978.11	3958.74	3470.32	3751.63
ENSMUSG00000011256	3752.34	3675.79	3752.69	3999.21	4079.27	4326.66
ENSMUSG00000026564	4026	3977.95	4115.29	3709.22	3661.77	3891.09
ENSMUSG00000017119	3838.43	3844.89	3996.46	3978.01	3752.89	3932.93
ENSMUSG00000032712	4080.32	4525.9	4194.8	3712.11	3423.04	3246.33
ENSMUSG00000031633	3786.16	3893.86	3797.25	3922.13	3950.1	3999.45
ENSMUSG00000026094	3954.25	4053.72	3983.35	4142.76	3398.82	3562.81
ENSMUSG00000026211	3687.76	3515.93	3374.36	3978.98	4405.66	4445.74
ENSMUSG00000024238	3883.53	4095.3	3853.17	3823.86	3666.39	3837.45
ENSMUSG00000027680	3880.46	3969.63	3738.71	3931.77	3940.88	3749.48
ENSMUSG00000020326	3915.3	4128.56	4158.97	3742.94	3591.42	3528.48
ENSMUSG00000078812	3936.83	3858.75	4084.71	3715	3811.71	3721.59
ENSMUSG00000028639	4012.67	3883.7	3817.34	3711.14	3837.08	3898.6
ENSMUSG00000004897	3654.97	3951.15	3983.35	3629.25	3930.5	3770.94
ENSMUSG00000006676	3925.55	3952.07	3846.18	3625.4	3827.85	3726.95
ENSMUSG00000028413	3748.24	3895.71	3842.68	3843.13	3819.78	3713.01
ENSMUSG00000064337	3639.59	3606.49	3563.96	4078.21	4106.95	3883.58
ENSMUSG00000007850	3613.97	3881.85	3789.38	4170.7	3567.2	3631.47
ENSMUSG00000041736	3898.9	3940.06	3810.35	3380.68	3702.14	3854.62
ENSMUSG00000033306	3762.59	3834.72	3538.62	4138.91	3672.15	3629.33
ENSMUSG00000030352	3600.64	3773.74	3647.84	3675.5	3991.62	3939.37
ENSMUSG00000059070	3753.36	4038.93	3812.97	3427.89	3833.62	3673.31
ENSMUSG00000061477	3825.11	3666.55	3603.28	3652.37	3873.98	3932.93
ENSMUSG00000092267	3246.01	4449.2	3320.19	5493.49	3216.6	2528.62
ENSMUSG00000005124	3912.23	3966.86	4004.32	3850.84	3203.91	3357.91
ENSMUSG00000066406	3627.29	3566.75	3640.85	4030.04	3645.63	3915.77
ENSMUSG00000066306	3916.33	3711.83	3817.34	3568.55	3635.25	3729.1
ENSMUSG00000016554	3875.33	3798.69	3723.85	3543.5	3646.78	3790.25
ENSMUSG00000041740	3743.11	3670.24	3820.84	3567.59	3895.9	3658.29
ENSMUSG00000020936	3785.13	3791.29	3874.14	3410.55	3534.91	3911.48
ENSMUSG00000038807	3602.69	3521.48	3553.48	3779.55	3804.79	4134.62
ENSMUSG00000020836	3674.44	3511.31	3236.31	3597.46	4021.61	4424.28
ENSMUSG00000074221	3865.08	4275.48	3866.27	3537.72	3327.31	3251.7
ENSMUSG00000006333	3574	3927.13	3585.8	3515.57	3948.95	3737.68
ENSMUSG00000016382	3626.27	3659.16	3561.34	4080.14	3602.96	3662.58
ENSMUSG00000020671	3650.87	3608.33	3529.01	3925.02	3707.91	3788.1
ENSMUSG00000040850	3620.12	3562.13	3491.44	4153.36	3637.56	3719.44
ENSMUSG00000017009	3788.21	3384.72	3717.74	3729.45	3741.35	3836.38
ENSMUSG00000048154	3908.13	3582.46	3863.65	3414.4	3538.37	3814.92
ENSMUSG00000037072	3659.07	3893.86	3776.28	3823.86	3631.79	3278.52
ENSMUSG00000022508	3888.65	3776.51	3820.84	3398.99	3506.08	3706.57
ENSMUSG00000041028	3547.35	3557.51	3557.84	3951.04	3871.68	3677.6
ENSMUSG00000017386	4045.47	4093.45	3954.52	3087.8	3222.36	3581.05
ENSMUSG00000020402	3570.92	3464.19	3397.95	3861.44	3968.56	3932.93
ENSMUSG00000021248	3665.22	3546.42	3764.05	3819.05	3597.19	3651.86
ENSMUSG00000035150	3493.02	3520.55	3552.6	3994.39	3735.59	3711.93
ENSMUSG00000031770	3904.03	3755.26	3778.9	3329.62	3524.53	3652.93
ENSMUSG00000028583	3576.05	3582.46	3721.23	3833.5	3675.61	3532.77
ENSMUSG00000034248	3337.23	3589.85	3378.73	4023.29	3752.89	3887.88
ENSMUSG00000030208	3330.06	3567.68	3432.9	4113.86	3882.06	3629.33
ENSMUSG00000025969	3602.69	3515.01	3598.91	3827.72	3642.17	3724.81
ENSMUSG00000030662	3454.08	3370.86	3445.13	3907.68	3993.93	3809.56
ENSMUSG00000022389	3687.76	3711.83	3468.72	3643.7	3645.63	3691.55
ENSMUSG00000036533	3799.48	3885.54	3875.01	3521.35	3160.08	3449.09
ENSMUSG00000038132	3904.03	3981.64	3938.79	3254.48	3323.85	3294.61
ENSMUSG00000029455	3671.37	3518.7	3380.48	3367.2	3869.37	4083.13
ENSMUSG00000053907	3682.64	3457.72	3542.12	3768.95	3606.42	3736.61
ENSMUSG00000000346	3595.52	3567.68	3601.53	3504.97	3737.89	3768.79
ENSMUSG00000061603	3519.67	3484.52	3171.65	3936.59	3780.57	3941.52
ENSMUSG00000040260	3720.56	3867.06	3825.21	3344.07	3399.97	3483.42
ENSMUSG00000024360	3508.4	3655.46	3522.02	3582.04	3685.99	3782.74
ENSMUSG00000002102	3860.98	3681.33	3889.86	3295.9	3485.32	3437.29
ENSMUSG00000071644	3549.4	3602.79	3618.13	3455.83	3745.97	3736.61
ENSMUSG00000068196	3515.57	3374.56	3328.05	4020.4	3684.84	3808.49
ENSMUSG00000036564	3382.33	3496.53	3305.34	3630.21	3675.61	4268.72
ENSMUSG00000023092	3641.64	3692.42	3579.69	3452.94	3661.77	3637.91
ENSMUSG00000021218	3468.43	3510.39	3381.35	4046.42	3585.66	3664.73
ENSMUSG00000029781	3621.14	3613.88	3760.55	3522.31	3486.47	3539.21
ENSMUSG00000035131	3668.29	3831.95	3687.16	3591.68	3226.98	3444.8
ENSMUSG00000022564	3476.63	3546.42	3497.56	3372.98	3811.71	3891.09
ENSMUSG00000056342	3403.85	3696.12	3474.84	3870.11	3582.2	3479.13
ENSMUSG00000021660	3459.2	3542.73	3750.94	3523.27	3767.88	3434.08
ENSMUSG00000030536	3528.9	3441.09	3475.71	3912.5	3470.32	3619.67
ENSMUSG00000026554	3503.27	3474.35	3702.88	3692.84	3601.8	3428.71
ENSMUSG00000046364	3521.72	3645.3	3597.16	3265.07	3583.35	3798.83
ENSMUSG00000042650	3485.85	3384.72	3460.86	3702.47	3675.61	3710.86
ENSMUSG00000044217	3837.41	3852.28	3882	3195.71	3216.6	3267.79
ENSMUSG00000027803	3374.13	3304.33	3301.84	3872.04	3803.63	3772.01
ENSMUSG00000020674	3728.76	3608.33	3806.86	3417.3	3240.81	3455.53
ENSMUSG00000042520	3501.22	3473.43	3496.68	3639.85	3626.02	3587.49
ENSMUSG00000039286	3460.23	3654.54	3441.64	3653.34	3547.6	3508.1
ENSMUSG00000041801	3783.08	3851.35	3888.99	2909.57	3343.46	3380.43
ENSMUSG00000092274	3502.25	3790.37	3667.93	3605.16	3541.83	3024.26
ENSMUSG00000051391	3504.3	3490.06	3435.52	3589.75	3563.74	3635.76
ENSMUSG00000039959	3423.33	3198.99	3177.77	3754.5	3838.23	3923.28
ENSMUSG00000027184	3589.37	3437.39	3597.16	3577.23	3472.63	3478.06
ENSMUSG00000026251	3525.82	3432.77	3358.63	3515.57	3751.73	3641.13
ENSMUSG00000022894	3678.54	3389.34	3400.57	3673.57	3517.61	3502.74
ENSMUSG00000025613	3363.88	3555.67	3478.33	3708.25	3508.38	3479.13
ENSMUSG00000056076	3525.82	3504.84	3526.39	3352.75	3470.32	3737.68
ENSMUSG00000037563	3658.04	3627.74	3510.66	3135.97	3562.59	3618.6
ENSMUSG00000079477	3463.3	3606.49	3672.3	3371.05	3363.07	3558.52
ENSMUSG00000059005	3425.38	3505.77	3577.94	3846.99	3421.89	3245.26
ENSMUSG00000003813	3610.89	3415.21	3506.29	3297.83	3562.59	3706.57
ENSMUSG00000040998	3402.83	3311.72	3194.37	3567.59	3784.03	3901.82
ENSMUSG00000019179	3466.38	3458.64	3505.42	3399.95	3514.15	3673.31
ENSMUSG00000030727	3208.09	3046.53	2888.56	3480.88	4268.42	4362.06
ENSMUSG00000004105	3536.07	3350.53	3473.09	3318.06	3668.69	3666.88
ENSMUSG00000005683	3384.38	3210.08	3205.73	3728.48	3666.39	3859.98
ENSMUSG00000031555	3521.72	3453.1	3413.68	3678.39	3424.19	3458.75
ENSMUSG00000057113	3328.01	3438.31	3560.47	3850.84	3647.94	3067.17
ENSMUSG00000032440	3576.05	3821.79	3700.26	3403.81	3225.82	3076.83
ENSMUSG00000030189	3636.52	3296.01	3315.82	3334.44	3803.63	3628.25
ENSMUSG00000041841	3343.38	3585.23	3356.89	3274.71	3613.34	3776.3
ENSMUSG00000027620	3442.8	3478.05	3376.98	3607.09	3561.44	3450.17
ENSMUSG00000006576	3569.9	3408.74	3267.76	3309.39	3560.28	3859.98
ENSMUSG00000001175	3287.01	3493.76	3561.34	3627.32	3434.57	3414.76
ENSMUSG00000075706	3567.85	3461.41	3617.26	3154.28	3488.78	3563.89
ENSMUSG00000004665	3579.12	3315.42	3640.85	3300.72	3411.51	3581.05
ENSMUSG00000024587	3618.07	3417.06	3528.14	3562.77	3381.52	3268.86
ENSMUSG00000017631	3345.43	3453.1	3321.94	3557.96	3541.83	3613.24
ENSMUSG00000022141	3363.88	3567.68	3390.09	3704.4	3310.01	3402.96
ENSMUSG00000024392	3607.82	3563.06	3529.01	3223.65	3553.36	3280.66
ENSMUSG00000029390	3552.47	3469.73	3397.95	3532.91	3301.94	3475.91
ENSMUSG00000002812	3419.23	3289.54	3364.75	3421.15	3665.23	3626.11
ENSMUSG00000047888	3454.08	3466.96	3259.03	3714.03	3366.53	3458.75
ENSMUSG00000026478	3406.93	3403.2	3065.06	3833.5	3464.56	3563.89
ENSMUSG00000022377	3476.63	3477.12	3484.45	3447.16	3273.11	3453.39
ENSMUSG00000056851	3201.94	3308.95	3421.54	3629.25	3707.91	3400.82
ENSMUSG00000012848	3467.4	3431.85	3528.14	3106.11	3547.6	3563.89
ENSMUSG00000030084	3721.59	3369.94	3536	3296.87	3162.39	3482.35
ENSMUSG00000028081	3182.47	3256.28	3332.42	3528.09	3837.08	3537.07
ENSMUSG00000055320	3096.37	3171.27	3123.6	3844.1	3555.67	3887.88
ENSMUSG00000094410	3339.28	3539.03	3206.6	3873.96	3058.59	3510.25
ENSMUSG00000018567	3404.88	3263.67	3497.56	3477.99	3470.32	3458.75
ENSMUSG00000016319	3384.38	3378.25	3335.04	3366.23	3504.92	3627.18
ENSMUSG00000032085	3748.24	3422.61	3828.7	3231.35	3132.4	2997.44
ENSMUSG00000001794	3275.74	3439.24	3335.92	3137.9	3718.29	3619.67
ENSMUSG00000020349	3530.95	3355.15	3509.79	3382.61	3222.36	3351.47
ENSMUSG00000053477	3544.27	3367.16	3653.08	3567.59	3062.05	3089.7
ENSMUSG00000024664	3380.28	3464.19	3310.58	3214.97	3418.43	3622.89
ENSMUSG00000036879	3237.81	3179.59	3176.02	3756.42	3394.21	3682.97
ENSMUSG00000029064	3402.83	3315.42	3615.51	3284.34	3348.07	3379.36
ENSMUSG00000001025	3348.51	3280.3	3635.61	3438.49	3462.25	3139.05
ENSMUSG00000024083	3165.04	3228.56	3367.37	3529.05	3357.3	3664.73
ENSMUSG00000031776	3394.63	3471.58	3516.78	3196.67	3250.04	3404.04
ENSMUSG00000029869	3378.23	3303.41	3474.84	3303.61	3440.34	3321.43
ENSMUSG00000034165	3173.24	2954.12	3043.22	3432.71	3899.36	3857.84
ENSMUSG00000007815	3550.42	3299.71	3473.09	3422.11	3177.38	3164.8
ENSMUSG00000032525	3175.29	3255.36	3280.87	3736.19	3228.13	3386.87
ENSMUSG00000034708	3401.8	3314.49	3526.39	3162.95	3356.15	3288.17
ENSMUSG00000037331	3421.28	3281.23	3430.28	3274.71	3265.03	3379.36
ENSMUSG00000032096	3218.34	3314.49	3363	3357.56	3334.23	3457.68
ENSMUSG00000005103	3256.26	3218.39	3542.12	3376.83	3330.77	3257.06
ENSMUSG00000022353	3243.96	3277.53	3260.77	3351.78	3428.81	3453.39
ENSMUSG00000032334	3606.79	3560.29	3378.73	2745.78	3187.76	3450.17
ENSMUSG00000022098	3516.6	3505.77	3453	3161.99	3062.05	3136.91
ENSMUSG00000033955	3314.68	3276.61	3336.79	3314.21	3405.74	3255.99
ENSMUSG00000019055	3191.69	3229.48	3195.24	3240.02	3492.24	3615.38
ENSMUSG00000051985	3100.47	3095.5	2715.56	3328.66	3685.99	4152.86
ENSMUSG00000028426	3391.55	3268.29	3193.5	3447.16	3330.77	3247.41
ENSMUSG00000027293	3240.89	3170.35	3100.88	3465.47	3436.88	3416.91
ENSMUSG00000048126	3043.07	3102.89	3052.83	3562.77	3519.92	3567.1
ENSMUSG00000033763	3410	3200.84	3379.6	3273.74	3245.43	3242.04
ENSMUSG00000026308	3035.9	3057.61	2989.92	3616.73	3612.18	3505.95
ENSMUSG00000052253	3453.05	3559.36	3536.87	2856.58	3198.14	3041.43
ENSMUSG00000051695	3488.92	3474.35	3307.08	2954.85	3179.69	3283.88
ENSMUSG00000007739	3049.22	3292.32	3199.61	3474.14	3419.58	3227.02
ENSMUSG00000026353	3299.31	3345.91	3253.78	3293.01	3211.98	3207.71
ENSMUSG00000032380	3137.37	3275.68	3286.11	3345.04	3230.44	3302.12
ENSMUSG00000020859	3097.39	3137.08	3255.53	3384.54	3351.53	3374
ENSMUSG00000027177	3184.52	3267.37	3081.66	3425	3168.16	3383.65
ENSMUSG00000040731	3242.94	3284	3309.7	3198.6	3172.77	3193.77
ENSMUSG00000076431	3497.12	3304.33	3268.64	3178.36	3056.28	3044.64
ENSMUSG00000019848	3289.06	3418.91	3190	3130.19	3108.18	3209.86
ENSMUSG00000026341	3134.29	3314.49	3243.3	3347.93	3009	3272.08
ENSMUSG00000037712	3123.02	2942.11	3055.45	3461.61	3478.4	3382.58
ENSMUSG00000028656	3115.84	3246.12	3210.97	3161.99	3293.87	3297.83
ENSMUSG00000044308	3096.37	3204.53	2932.25	3559.88	3325.01	3215.22
ENSMUSG00000000078	3130.19	3214.7	3324.56	3378.76	3127.79	3061.81
ENSMUSG00000074305	3147.62	3120.45	3083.41	3402.84	3192.38	3357.91
ENSMUSG00000029050	3322.88	3455.87	3352.52	2912.46	3025.14	3127.25
ENSMUSG00000063316	3183.49	3371.78	3181.26	3083.95	3032.06	3369.71
ENSMUSG00000024404	3172.22	3208.23	3277.38	3142.72	3253.5	3141.2
ENSMUSG00000045302	3178.37	3186.05	3113.99	3133.08	3318.09	3303.19
ENSMUSG00000029068	3050.25	3138	3172.53	3322.88	3282.33	3224.88
ENSMUSG00000085148	3241.91	3230.41	3236.31	3126.34	3185.46	3134.76
ENSMUSG00000035673	3044.1	3142.62	3206.6	2977.97	3481.86	3362.2
ENSMUSG00000040463	3371.06	3226.71	3245.05	3063.72	3187.76	3045.72
ENSMUSG00000002052	3105.59	2977.22	3324.56	3403.81	3056.28	3257.06
ENSMUSG00000032374	2891.38	2871.88	3023.99	3621.54	3545.29	3268.86
ENSMUSG00000025234	3078.95	3207.31	3067.68	3298.79	3245.43	3261.35
ENSMUSG00000027861	3062.55	3231.33	3107	3288.2	3246.58	3198.06
ENSMUSG00000021127	3109.69	3106.59	3071.17	3165.84	3335.39	3363.27
ENSMUSG00000039220	3277.79	3236.88	3363	3012.65	2976.71	3175.53
ENSMUSG00000031422	3319.81	3153.71	3168.16	3372.98	2984.78	3045.72
ENSMUSG00000006304	3046.15	3274.76	3188.25	3247.73	3153.16	3136.91
ENSMUSG00000027002	3104.57	3050.22	3040.59	3354.67	3254.65	3289.25
ENSMUSG00000020594	3211.16	3232.25	3045.84	3366.23	3078.2	3111.16
ENSMUSG00000079641	3057.42	3136.16	2798.57	3414.4	3510.69	3215.22
ENSMUSG00000024695	2977.48	3148.17	3007.39	3440.42	3124.33	3357.91
ENSMUSG00000078566	2764.29	2737.9	2683.24	3479.92	3820.93	3755.92
ENSMUSG00000021577	3140.44	3040.06	3032.73	3113.81	3486.47	3262.43
ENSMUSG00000023977	3297.26	3231.33	3008.27	3172.58	3068.97	3221.66
ENSMUSG00000032231	3031.8	3081.64	3140.2	3417.3	3300.79	2992.08
ENSMUSG00000040385	3096.37	3272.91	3242.43	3007.84	2953.64	3281.74
ENSMUSG00000001642	3018.47	3120.45	3179.52	2931.73	3301.94	3337.52
ENSMUSG00000009079	3110.72	3212.85	3210.1	3218.83	3170.46	2874.07
ENSMUSG00000031169	3059.47	3116.75	3017.88	3127.3	3140.48	3375.07
ENSMUSG00000006005	3030.77	3126.92	3153.31	3305.54	3032.06	3120.81
ENSMUSG00000026615	3177.34	3082.56	3130.59	3165.84	3285.79	2933.07
ENSMUSG00000028416	3151.72	3132.46	3120.98	3082.02	3141.63	3132.61
ENSMUSG00000030748	2989.77	3076.09	2961.96	3119.59	3286.95	3379.36
ENSMUSG00000020088	3105.59	3123.22	3221.46	3183.18	3096.65	2938.44
ENSMUSG00000025153	3298.28	3164.8	3073.8	3127.3	2836	3173.38
ENSMUSG00000034593	2929.3	3064.08	2948.85	3480.88	3119.72	3144.42
ENSMUSG00000009927	3031.8	2980.92	3093.89	3101.29	3363.07	3136.91
ENSMUSG00000032097	3032.82	3102.89	2978.56	3290.12	3180.84	3084.34
ENSMUSG00000001552	2942.63	3027.12	2789.83	3116.7	3442.64	3426.57
ENSMUSG00000022841	3263.44	3050.22	3120.1	2896.08	3062.05	3192.69
ENSMUSG00000031841	3103.54	2978.15	2891.19	3075.28	3153.16	3416.91
ENSMUSG00000034024	3158.89	3018.8	3078.16	3175.47	3107.03	2972.77
ENSMUSG00000019132	3147.62	3109.36	2969.82	3175.47	3036.68	3066.1
ENSMUSG00000027706	2963.13	3100.12	2972.44	3166.8	3215.44	3105.79
ENSMUSG00000031765	3136.34	2952.27	3191.75	2835.38	3346.92	3067.17
ENSMUSG00000020423	2854.48	3016.96	2916.52	3113.81	3456.48	3213.08
ENSMUSG00000034290	3142.49	3149.09	3049.33	2896.08	3155.47	3065.03
ENSMUSG00000024294	3004.12	2982.77	2958.46	3232.32	3085.12	3202.35
ENSMUSG00000025162	3132.24	3013.26	3130.59	3106.11	2886.75	3118.67
ENSMUSG00000027660	3091.24	2888.52	2919.14	3316.13	3150.86	3070.39
ENSMUSG00000042688	3071.77	3029.89	2958.46	3052.15	3164.7	3136.91
ENSMUSG00000005506	3094.32	3102.89	2982.05	3299.76	2816.39	3044.64
ENSMUSG00000007097	3036.92	3026.2	2859.73	2924.02	3313.47	3295.68
ENSMUSG00000032336	3051.27	3134.31	3110.49	3153.31	2998.62	2870.85
ENSMUSG00000052957	3326.98	3377.33	3056.32	2759.27	2949.03	2819.35
ENSMUSG00000034659	3135.32	3029.89	3134.96	2771.8	3087.42	3169.09
ENSMUSG00000074364	3144.54	3185.13	3082.53	3047.34	2923.65	2878.36
ENSMUSG00000026924	3059.47	2885.74	2979.43	3203.41	3019.38	3135.83
ENSMUSG00000026238	3051.27	3066.85	3183.01	3088.76	3033.22	2792.53
ENSMUSG00000014956	2930.33	2968.91	2911.28	3457.76	3007.85	2979.2
ENSMUSG00000051367	3169.14	3117.68	3009.14	2836.35	3092.04	3038.21
ENSMUSG00000056091	3069.72	3004.02	3035.35	3058.9	2942.11	3077.9
ENSMUSG00000036438	2970.3	2928.25	3158.55	3306.5	3038.98	2737.82
ENSMUSG00000002107	2976.45	2965.21	3111.37	3188.96	2897.13	3009.24
ENSMUSG00000027215	3160.94	3127.84	3248.54	2819	2844.07	2880.5
ENSMUSG00000049550	2989.77	3013.26	2924.39	3071.42	3170.46	2991
ENSMUSG00000038244	3067.67	2831.23	3117.48	2973.15	3045.9	3093.99
ENSMUSG00000000563	3003.1	3184.21	2991.66	2915.35	2992.85	2981.35
ENSMUSG00000025232	2999	3024.35	3065.06	2906.68	3018.23	3066.1
ENSMUSG00000037876	2879.08	3207.31	3110.49	3057.93	2774.88	2981.35
ENSMUSG00000027893	2804.26	2911.62	2944.48	3082.02	3055.13	3305.34
ENSMUSG00000037111	2988.75	2914.39	2747.89	3199.56	3012.46	3253.84
ENSMUSG00000001910	3001.05	3042.83	3116.61	2847.91	2884.44	3146.56
ENSMUSG00000008668	2970.3	2972.6	2986.42	2992.42	3172.77	2957.75
ENSMUSG00000031703	3117.89	3083.49	2853.61	3056.01	2973.25	2950.24
ENSMUSG00000072235	3151.72	2932.87	2931.38	2978.93	2967.48	3052.15
ENSMUSG00000039405	3034.87	2924.55	2869.34	3260.26	3036.68	2878.36
ENSMUSG00000036256	3165.04	3001.25	2912.15	2862.36	3036.68	3036.06
ENSMUSG00000038495	2931.35	3153.71	2880.7	3113.81	3036.68	2830.08
ENSMUSG00000022201	3030.77	2989.24	3039.72	3082.98	2860.22	2908.4
ENSMUSG00000057672	3061.52	3079.79	2934	2837.31	3101.26	2935.22
ENSMUSG00000025508	3094.32	3082.56	3017	2552.13	3117.41	3095.07
ENSMUSG00000033228	2868.83	2918.08	2826.53	3181.25	3038.98	3119.74
ENSMUSG00000038991	3025.65	2910.69	3124.47	2811.3	3018.23	3001.73
ENSMUSG00000001525	2854.48	2835.85	2850.99	2891.26	3349.23	3195.91
ENSMUSG00000021250	2832.96	2685.23	2377.43	2882.59	3706.75	3650.78
ENSMUSG00000004789	3055.37	2953.2	2944.48	2885.48	3150.86	2897.67
ENSMUSG00000028514	2900.6	3117.68	2818.67	3072.39	2876.37	3054.3
ENSMUSG00000025332	2859.61	3089.95	2860.6	3027.11	2901.74	3092.92
ENSMUSG00000030432	2946.73	2847.86	2902.54	2618.61	3346.92	3255.99
ENSMUSG00000022358	2866.78	2934.72	2903.42	2989.53	3265.03	2886.94
ENSMUSG00000062901	2975.43	2959.67	2816.92	3072.39	3020.53	2969.55
ENSMUSG00000002885	3136.34	3162.95	3003.02	2692.79	2870.6	2896.6
ENSMUSG00000019769	2907.78	2938.41	2924.39	2987.6	2977.86	3060.74
ENSMUSG00000015165	2979.53	2870.04	3010.89	3059.86	2955.95	2866.56
ENSMUSG00000019558	2841.16	2973.53	2928.76	3110.92	2831.39	3037.13
ENSMUSG00000013593	2986.7	2850.63	2953.22	2911.49	2917.89	3137.98
ENSMUSG00000004098	2994.9	2755.46	2792.45	3051.19	3075.89	3131.54
ENSMUSG00000024853	2901.63	2854.33	2990.79	3014.58	2937.49	3034.99
ENSMUSG00000001089	2819.63	2752.68	2961.96	3258.33	2912.12	3024.26
ENSMUSG00000037820	2826.81	3062.23	2872.84	2819.97	3044.75	3100.43
ENSMUSG00000024143	2745.84	2703.71	2677.99	3320.95	3100.11	3225.95
ENSMUSG00000037857	2973.38	2789.64	2932.25	3250.62	2749.5	2893.38
ENSMUSG00000029070	3141.47	3095.5	3197.87	2632.1	2803.71	2674.52
ENSMUSG00000040118	2797.08	2625.17	2671	3319.99	3038.98	3224.88
ENSMUSG00000028108	3123.02	2762.85	2756.63	2858.5	3063.2	3105.79
ENSMUSG00000028082	2929.3	2845.09	2857.11	3046.37	2944.41	2975.98
ENSMUSG00000059495	2838.08	2960.59	2807.31	3075.28	2844.07	3032.84
ENSMUSG00000026365	2844.23	2964.29	2847.5	2991.46	2952.49	2963.11
ENSMUSG00000030218	2925.2	2712.03	3008.27	3128.27	2912.12	2852.61
ENSMUSG00000030342	2831.93	2764.7	2982.05	3097.44	2944.41	2923.42
ENSMUSG00000035202	2205.69	2751.76	5191.73	2049.22	2702.22	2262.56
ENSMUSG00000022336	2800.16	2815.52	2827.4	3144.64	2917.89	3037.13
ENSMUSG00000026335	2688.44	2683.38	2772.36	3253.51	3122.02	3052.15
ENSMUSG00000008683	2839.11	2856.18	2844	2961.59	3068.97	2973.84
ENSMUSG00000019087	2841.16	2889.44	2895.55	3049.26	2922.5	2895.52
ENSMUSG00000031441	2813.48	2965.21	2852.74	3065.64	2925.96	2856.9
ENSMUSG00000022914	2890.35	2988.31	2800.32	3127.3	2713.75	2933.07
ENSMUSG00000029622	2904.7	2899.6	2924.39	2864.28	3011.31	2856.9
ENSMUSG00000079243	2938.53	3022.5	2950.6	2743.86	2782.95	2979.2
ENSMUSG00000009418	2847.31	2950.43	2897.3	3080.09	2729.9	2896.6
ENSMUSG00000022139	2888.3	2862.64	2635.18	3216.9	2897.13	2926.63
ENSMUSG00000035133	2952.88	2894.98	2748.77	3210.16	2814.09	2766.79
ENSMUSG00000020190	2913.93	2676.91	2753.14	2754.45	3184.3	3157.29
ENSMUSG00000061787	2787.86	2858.95	2884.2	2888.37	2965.17	2940.58
ENSMUSG00000016262	2944.68	3092.73	3096.51	2889.33	2628.4	2544.71
ENSMUSG00000021819	2817.58	2907.92	3021.37	2833.46	2729.9	2942.73
ENSMUSG00000045039	2973.38	2851.55	2858.86	2771.8	2937.49	2914.83
ENSMUSG00000055436	2897.53	2825.68	2809.05	3143.68	2756.42	2819.35
ENSMUSG00000046330	2930.33	2841.39	2867.59	2518.41	3035.52	3124.03
ENSMUSG00000055024	2905.73	2927.33	2926.13	2805.52	2687.22	2923.42
ENSMUSG00000025016	2792.98	2791.49	2795.07	3103.22	2890.21	2819.35
ENSMUSG00000019978	2681.27	2791.49	2774.98	3163.91	2977.86	2789.31
ENSMUSG00000097660	2556.22	2747.14	2541.69	2841.16	3396.51	3210.93
ENSMUSG00000020205	2818.61	2748.06	2989.04	2635.95	2841.77	3128.32
ENSMUSG00000030530	2971.33	2815.52	2719.06	2619.57	3055.13	3034.99
ENSMUSG00000001847	2833.98	2831.23	2844	2916.31	2884.44	2810.77
ENSMUSG00000045482	2810.41	2845.09	2640.42	2962.56	2925.96	2972.77
ENSMUSG00000048756	2921.1	3007.72	3008.27	2617.65	2755.27	2738.89
ENSMUSG00000020358	3018.47	2829.38	2979.43	2815.15	2584.58	2805.41
ENSMUSG00000028868	2855.51	2853.4	2818.67	2882.59	2816.39	2845.1
ENSMUSG00000028053	2731.49	2868.19	2747.89	3195.71	2665.31	2818.28
ENSMUSG00000041734	2813.48	2789.64	2975.94	2844.05	2808.32	2798.97
ENSMUSG00000016194	2588	2596.52	2813.42	3014.58	3053.98	3032.84
ENSMUSG00000079037	2671.02	2748.06	2654.4	3043.48	2964.02	2944.87
ENSMUSG00000030007	2758.14	2843.24	2876.33	2852.72	2826.77	2782.88
ENSMUSG00000034297	2723.29	2705.56	2727.8	3226.54	2604.19	2945.95
ENSMUSG00000044533	2769.41	2879.28	2916.52	2733.26	2774.88	2849.39
ENSMUSG00000069769	2728.41	2590.98	2648.29	3188.96	2876.37	2943.8
ENSMUSG00000024501	2965.18	2633.48	2778.47	3070.46	2695.3	2779.66
ENSMUSG00000026083	2807.33	2805.35	2837.89	3025.18	2772.57	2629.47
ENSMUSG00000016921	2845.26	2785.95	2781.97	3041.56	2571.89	2825.79
ENSMUSG00000006435	3037.95	2915.31	2781.97	2433.63	2772.57	2957.75
ENSMUSG00000032228	2845.26	2832.15	2798.57	2989.53	2711.44	2656.29
ENSMUSG00000027593	2702.79	2573.42	2919.14	2674.49	2942.11	3089.7
ENSMUSG00000022551	2959.03	2771.16	2881.57	2488.55	2867.14	2900.89
ENSMUSG00000058056	2983.63	2942.11	2991.66	2693.76	2531.53	2624.1
ENSMUSG00000041453	2773.51	2800.73	2626.44	2828.64	2976.71	2885.87
ENSMUSG00000027602	2969.28	2961.51	3034.48	2217.82	2704.52	2910.54
ENSMUSG00000007564	2850.38	2876.5	2858.86	2700.5	2920.19	2599.43
ENSMUSG00000029131	2747.89	2767.47	2774.1	2807.44	2890.21	2822.57
ENSMUSG00000041891	2790.93	2800.73	2814.3	2809.37	2707.98	2825.79
ENSMUSG00000032458	2726.36	2599.29	2830.02	2899.93	2910.97	2815.06
ENSMUSG00000059040	2723.29	2791.49	2719.93	2735.19	2997.47	2830.08
ENSMUSG00000024953	2755.06	2847.86	2879.83	2658.11	2915.58	2654.14
ENSMUSG00000007655	2535.72	2825.68	2594.12	2944.25	2883.29	2945.95
ENSMUSG00000029777	2757.11	2737.9	2721.68	2918.24	2774.88	2701.34
ENSMUSG00000003429	2862.68	2738.82	2565.28	2638.84	2898.28	2972.77
ENSMUSG00000001416	2716.11	2770.24	2831.77	2823.82	2667.62	2756.06
ENSMUSG00000039852	2833.98	2810.9	2816.04	2743.86	2680.3	2674.52
ENSMUSG00000038324	2724.31	2677.84	2711.2	2840.2	2839.46	2817.21
ENSMUSG00000015733	2604.39	2819.21	2631.69	2955.81	2804.86	2771.08
ENSMUSG00000013698	2728.41	2645.5	2677.12	2874.88	2811.78	2870.85
ENSMUSG00000060373	2810.41	2764.7	2710.32	2798.77	2811.78	2653.07
ENSMUSG00000034908	2836.03	2773.01	2827.4	2479.88	2814.09	2797.9
ENSMUSG00000029106	2822.71	2645.5	2650.03	2880.66	2757.58	2780.73
ENSMUSG00000032060	2632.07	2582.66	2526.84	2905.71	2925.96	3019.97
ENSMUSG00000031983	2785.81	2735.13	2720.81	2565.62	2893.67	2851.54
ENSMUSG00000003660	2660.77	2696.32	2824.78	2821.89	2758.73	2719.58
ENSMUSG00000022270	2684.34	2593.75	2553.05	3038.67	2855.61	2806.48
ENSMUSG00000028691	2702.79	2741.6	2719.93	2871.99	2776.03	2665.94
ENSMUSG00000062997	2756.09	2746.22	2754.88	2620.54	2966.33	2660.58
ENSMUSG00000036529	2794.01	2713.87	2622.95	2754.45	2777.18	2841.88
ENSMUSG00000021843	2727.39	2573.42	2561.79	2973.15	2817.55	2857.97
ENSMUSG00000016664	2681.27	2666.75	2566.16	2902.82	2799.1	2853.68
ENSMUSG00000026970	2685.37	2762.85	2709.45	2836.35	2674.54	2716.36
ENSMUSG00000020032	2603.37	2683.38	2789.83	2855.61	2669.92	2751.77
ENSMUSG00000000711	2582.87	2710.18	2683.24	2757.34	2822.16	2837.59
ENSMUSG00000032042	2625.92	2721.27	2684.11	2782.39	2761.04	2788.24
ENSMUSG00000097347	2801.18	2654.74	2839.64	2658.11	2606.49	2750.69
ENSMUSG00000057522	2664.87	2688.93	2658.77	2947.14	2714.9	2628.39
ENSMUSG00000026663	2718.16	2689.85	2663.14	2817.08	2695.3	2679.89
ENSMUSG00000028463	2642.32	2514.28	2398.4	2545.39	3096.65	3213.08
ENSMUSG00000030002	2745.84	2719.42	2623.82	2815.15	2626.1	2709.93
ENSMUSG00000060636	2592.09	2796.11	2754.88	2477.95	2826.77	2796.82
ENSMUSG00000021585	2590.04	2548.47	2601.11	2922.09	2841.77	2752.84
ENSMUSG00000020097	2813.48	2771.16	2631.69	2770.83	2631.86	2583.33
ENSMUSG00000020882	2748.91	2595.6	2570.53	2616.68	2859.07	2888.01
ENSMUSG00000063358	2696.64	2590.98	2641.3	2817.08	2771.42	2699.2
ENSMUSG00000036712	2611.57	2566.95	2486.65	2947.14	2741.43	2878.36
ENSMUSG00000028745	2656.67	2519.83	2671.88	2758.31	2792.18	2819.35
ENSMUSG00000003360	2713.04	2795.19	2720.81	2602.23	2717.21	2613.37
ENSMUSG00000052911	2778.64	2629.79	2705.95	2522.27	2743.74	2809.7
ENSMUSG00000021877	2623.87	2624.24	2730.42	2841.16	2590.35	2729.24
ENSMUSG00000018171	2620.79	2489.34	2496.26	3082.98	2863.68	2649.85
ENSMUSG00000024304	2596.19	2728.66	2599.36	2793.95	2615.72	2802.19
ENSMUSG00000015932	2630.02	2708.33	2890.31	2675.45	2601.88	2560.81
ENSMUSG00000022043	2911.88	2840.47	2636.93	2483.73	2563.82	2639.12
ENSMUSG00000006494	2322.53	2403.4	2375.68	2911.49	3049.36	3141.2
ENSMUSG00000042331	2600.29	2743.44	2619.45	2726.51	2674.54	2706.71
ENSMUSG00000015133	2662.82	2637.18	2737.41	2702.43	2624.94	2688.47
ENSMUSG00000029201	2727.39	2613.16	2703.33	2843.09	2634.17	2518.97
ENSMUSG00000001729	2739.69	2575.27	2619.45	2593.56	2703.37	2855.83
ENSMUSG00000036478	2814.51	2688.93	2720.81	2525.16	2716.06	2567.24
ENSMUSG00000025241	2387.11	2525.37	2414.13	2820.93	2943.26	3040.35
ENSMUSG00000020220	2640.27	2674.14	2537.32	2766.01	2546.52	2875.14
ENSMUSG00000026457	2478.33	2676.91	2587.13	2607.05	2875.21	2812.92
ENSMUSG00000026509	2689.46	2647.34	2574.89	2745.78	2751.81	2589.77
ENSMUSG00000029484	2677.17	2427.43	2338.11	2956.77	2910.97	2728.16
ENSMUSG00000029686	2552.12	2657.51	2677.12	2839.24	2574.2	2592.99
ENSMUSG00000026489	2693.56	2527.22	2434.22	2437.48	2969.79	2930.93
ENSMUSG00000067389	2697.66	2802.58	2786.34	2376.79	2643.4	2540.42
ENSMUSG00000022698	2730.46	2660.28	2575.77	2783.36	2541.91	2565.1
ENSMUSG00000022312	2632.07	2592.83	2544.31	2620.54	2772.57	2747.47
ENSMUSG00000021453	2956.98	3072.4	3175.15	2081.01	2313.55	2075.89
ENSMUSG00000020149	2422.98	2565.11	2563.54	2995.31	2583.43	2685.25
ENSMUSG00000031748	2698.69	2472.7	2386.17	2716.88	2809.48	2807.55
ENSMUSG00000032193	2422.98	2595.6	2710.32	2705.32	2643.4	2694.91
ENSMUSG00000053113	1654.27	2089.23	1528.16	3195.71	4375.68	3348.25
ENSMUSG00000032504	2632.07	2497.65	2667.51	2659.07	2646.86	2655.21
ENSMUSG00000031652	2733.54	2631.64	2709.45	2580.07	2475.01	2581.19
ENSMUSG00000031782	2804.26	2548.47	2588	2442.3	2674.54	2713.14
ENSMUSG00000021484	2561.35	2757.3	2643.04	2543.46	2676.84	2535.06
ENSMUSG00000037370	2694.59	2681.53	2603.73	2760.23	2450.79	2488.93
ENSMUSG00000037003	2558.27	2670.45	2722.55	2526.12	2573.05	2644.48
ENSMUSG00000025745	2635.14	2533.69	2588	2636.91	2686.07	2655.21
ENSMUSG00000039367	2535.72	2448.68	2615.09	2731.33	2594.96	2791.46
ENSMUSG00000027397	2582.87	2639.95	2526.84	2782.39	2495.77	2650.92
ENSMUSG00000028161	2593.12	2612.23	2525.09	2658.11	2652.62	2661.65
ENSMUSG00000058799	2437.33	2579.89	2449.95	2932.69	2665.31	2629.47
ENSMUSG00000022895	2709.96	2696.32	2739.16	2482.77	2510.77	2496.44
ENSMUSG00000046434	2621.82	2604.84	2639.55	2884.52	2539.6	2326.93
ENSMUSG00000027712	2445.53	2494.88	2574.02	2855.61	2704.52	2591.92
ENSMUSG00000013787	2608.49	2637.18	2729.54	2468.31	2538.45	2633.76
ENSMUSG00000035569	2608.49	2633.48	2476.16	2653.29	2704.52	2567.24
ENSMUSG00000056608	2659.74	2588.21	2513.73	2792.03	2433.49	2615.52
ENSMUSG00000022114	2540.85	2578.97	2740.03	2478.91	2613.41	2638.05
ENSMUSG00000030122	2774.54	2557.71	2810.8	2355.59	2551.13	2522.18
ENSMUSG00000020456	2618.74	2538.31	2536.45	2566.58	2569.59	2792.53
ENSMUSG00000034707	2561.35	2609.46	2502.37	2669.67	2699.91	2573.68
ENSMUSG00000063015	2529.57	2448.68	2311.03	2665.82	2920.19	2824.72
ENSMUSG00000029156	2435.28	2481.94	2312.77	2728.44	2855.61	2870.85
ENSMUSG00000002996	2503.95	2710.18	2532.08	2629.21	2651.47	2561.88
ENSMUSG00000021281	2518.3	2591.9	2541.69	2672.56	2569.59	2699.2
ENSMUSG00000035621	2797.08	2648.27	2550.43	2317.06	2593.81	2704.56
ENSMUSG00000014355	2497.8	2530.92	2489.27	2745.78	2714.9	2626.25
ENSMUSG00000031078	2599.27	2598.37	2695.47	2551.17	2545.37	2558.66
ENSMUSG00000031666	2532.65	2652.89	2454.32	2808.41	2561.51	2558.66
ENSMUSG00000031592	2523.42	2496.73	2501.5	2801.66	2576.51	2677.74
ENSMUSG00000021814	2443.48	2529.99	2481.4	2690.87	2727.59	2705.64
ENSMUSG00000068267	2665.89	2618.7	2688.48	2476.99	2541.91	2522.18
ENSMUSG00000021771	2504.97	2428.35	2425.49	2707.25	2771.42	2763.57
ENSMUSG00000054611	2555.2	2530.92	2731.29	2466.39	2618.02	2623.03
ENSMUSG00000002957	2699.71	2415.41	2482.28	2468.31	2763.34	2728.16
ENSMUSG00000039159	2612.59	2528.14	2572.27	2607.05	2439.26	2721.73
ENSMUSG00000031311	2600.29	2560.49	2535.58	2662.93	2515.38	2590.84
ENSMUSG00000041417	2349.18	2534.61	2482.28	2988.57	2744.89	2369.84
ENSMUSG00000029004	2484.48	2569.73	2607.22	2753.49	2578.81	2449.23
ENSMUSG00000037458	2665.89	2532.76	2487.52	2798.77	2374.68	2585.48
ENSMUSG00000028559	2504.97	2587.28	2485.77	2567.55	2765.65	2581.19
ENSMUSG00000017677	2532.65	2366.44	2570.53	2832.49	2615.72	2547.93
ENSMUSG00000022090	2579.8	2602.07	2859.73	2408.58	2540.75	2406.32
ENSMUSG00000040952	2668.97	2504.12	2580.14	2456.75	2644.55	2602.64
ENSMUSG00000023830	2387.11	2555.87	2331.12	2723.62	2710.29	2763.57
ENSMUSG00000037270	2406.58	2644.57	2426.36	2882.59	2379.29	2653.07
ENSMUSG00000034269	2409.65	2496.73	2435.97	2713.99	2663	2720.65
ENSMUSG00000024026	2491.65	2464.39	2520.72	2752.53	2519.99	2655.21
ENSMUSG00000031660	2507.02	2481.94	2590.62	2689.9	2607.64	2511.46
ENSMUSG00000039001	2472.18	2635.33	2641.3	2337.29	2692.99	2582.26
ENSMUSG00000029071	2616.69	2692.62	2546.93	2221.68	2534.99	2741.04
ENSMUSG00000024811	2657.69	2528.14	2481.4	2651.37	2450.79	2566.17
ENSMUSG00000039713	2495.75	2501.35	2608.97	2453.86	2628.4	2648.78
ENSMUSG00000079471	2635.14	2652.89	2499.75	2182.17	2705.68	2690.62
ENSMUSG00000042079	2594.14	2531.84	2472.67	2747.71	2488.85	2472.83
ENSMUSG00000043962	2663.84	2488.41	2507.62	2601.27	2528.07	2531.84
ENSMUSG00000036087	2552.12	2559.56	2427.23	2590.67	2575.35	2624.1
ENSMUSG00000003810	2470.13	2336.87	2254.23	2676.42	2725.28	2927.71
ENSMUSG00000024949	2548.02	2572.5	2665.76	2335.36	2586.89	2561.88
ENSMUSG00000053510	2409.65	2511.51	2430.73	2827.67	2589.19	2502.87
ENSMUSG00000051223	2390.18	2493.96	2362.58	2804.55	2590.35	2624.1
ENSMUSG00000002105	2661.79	2637.18	2636.06	2332.47	2390.82	2533.98
ENSMUSG00000056515	2543.92	2451.45	2723.43	2533.83	2417.35	2494.29
ENSMUSG00000020954	2422.98	2540.16	2466.55	2723.62	2529.22	2496.44
ENSMUSG00000023805	2405.55	2429.27	2460.43	2589.71	2564.97	2756.06
ENSMUSG00000005483	2473.2	2405.25	2484.9	2473.13	2683.76	2701.34
ENSMUSG00000028936	2351.23	2499.5	2494.51	2564.66	2644.55	2635.9
ENSMUSG00000011752	2424	2392.31	2472.67	2751.56	2646.86	2494.29
ENSMUSG00000004364	2481.4	2569.73	2515.48	2607.05	2464.63	2505.02
ENSMUSG00000021765	2640.27	2631.64	2647.41	2389.31	2411.58	2369.84
ENSMUSG00000053580	2315.36	2481.94	2366.07	2670.64	2472.71	2832.23
ENSMUSG00000007682	2125.74	2063.36	2014.83	3138.86	2955.95	2970.62
ENSMUSG00000020388	2775.56	2749.91	2753.14	2064.64	2332	2355.9
ENSMUSG00000056692	2542.9	2517.06	2420.24	2334.4	2649.16	2669.16
ENSMUSG00000033047	2523.42	2559.56	2410.63	2426.89	2522.3	2643.41
ENSMUSG00000018583	2455.78	2490.26	2486.65	2570.44	2484.24	2567.24
ENSMUSG00000029472	2507.02	2540.16	2529.46	2401.84	2400.05	2665.94
ENSMUSG00000025410	2580.82	2432.97	2521.6	2415.33	2586.89	2508.24
ENSMUSG00000024659	2494.72	2508.74	2461.31	2715.92	2479.63	2335.51
ENSMUSG00000023845	2339.96	2504.12	2360.83	2884.52	2378.14	2520.04
ENSMUSG00000031229	2409.65	2444.06	2330.25	2840.2	2433.49	2523.26
ENSMUSG00000031996	2545.97	2271.26	2552.18	2607.05	2494.62	2497.51
ENSMUSG00000030733	2620.79	2491.18	2563.54	2266.96	2433.49	2582.26
ENSMUSG00000029174	2401.45	2244.47	2193.07	2688.94	2681.46	2844.03
ENSMUSG00000005873	2433.23	2485.64	2532.08	2530.94	2424.27	2520.04
ENSMUSG00000025220	2502.92	2590.98	2624.7	2532.86	2370.06	2229.31
ENSMUSG00000020075	2489.6	2526.3	2634.31	2634.99	2274.34	2280.8
ENSMUSG00000030591	2446.55	2384.92	2535.58	2444.23	2568.43	2550.08
ENSMUSG00000030082	2521.37	2444.06	2495.38	2518.41	2529.22	2400.96
ENSMUSG00000032875	2522.4	2554.02	2539.94	2352.7	2370.06	2528.62
ENSMUSG00000022992	2534.7	2572.5	2517.23	2379.68	2386.21	2463.18
ENSMUSG00000026872	2502.92	2351.65	2386.17	2697.61	2428.88	2513.6
ENSMUSG00000057335	2276.41	2452.37	2262.1	2749.64	2652.62	2517.89
ENSMUSG00000031596	2460.9	2443.13	2446.45	2631.13	2427.73	2448.16
ENSMUSG00000026064	2545.97	2489.34	2477.04	2552.13	2393.13	2377.35
ENSMUSG00000011179	2451.68	2509.66	2569.65	2451.94	2450.79	2394.52
ENSMUSG00000037236	2453.73	2331.33	2406.26	2725.55	2514.23	2423.49
ENSMUSG00000039168	2330.73	2406.17	2576.64	2429.78	2530.37	2560.81
ENSMUSG00000020571	2657.69	2388.62	2607.22	2424	2404.66	2291.53
ENSMUSG00000028820	2529.57	2517.06	2574.02	2603.19	2115.18	2381.65
ENSMUSG00000041638	2494.72	2562.33	2401.02	2332.47	2491.16	2516.82
ENSMUSG00000052512	2374.81	2430.2	2354.71	2493.36	2488.85	2668.09
ENSMUSG00000014444	2535.72	2446.83	2511.98	2346.92	2411.58	2515.75
ENSMUSG00000026473	2379.93	2333.17	2304.91	2470.24	2726.44	2620.88
ENSMUSG00000034724	2364.56	2309.15	2221.91	2940.4	2456.56	2490
ENSMUSG00000031762	2334.83	2243.54	2516.35	2502.03	2884.44	2323.71
ENSMUSG00000002546	2402.48	2424.65	2438.59	2510.71	2406.97	2549
ENSMUSG00000029571	2427.08	2505.04	2334.62	2650.4	2383.9	2423.49
ENSMUSG00000006301	2403.5	2384.92	2412.38	2504.92	2529.22	2509.31
ENSMUSG00000022797	2202.61	2082.76	1961.53	2769.87	2780.64	3093.99
ENSMUSG00000019464	2491.65	2505.97	2444.71	2444.23	2419.65	2400.96
ENSMUSG00000026356	2374.81	2370.14	2327.63	2680.27	2525.76	2454.6
ENSMUSG00000020114	2397.35	2481.94	2393.16	2487.58	2447.33	2505.02
ENSMUSG00000038290	2412.73	2470.85	2624.7	2439.41	2499.23	2213.21
ENSMUSG00000022314	2404.53	2426.5	2331.12	2573.33	2636.48	2348.39
ENSMUSG00000031865	2521.37	2493.03	2370.44	2392.2	2465.79	2448.16
ENSMUSG00000062006	2223.11	2497.65	2352.09	2528.05	2570.74	2520.04
ENSMUSG00000057863	2507.02	2688	2460.43	2019.35	2526.91	2474.98
ENSMUSG00000065954	2255.91	2130.81	2355.59	2762.16	2644.55	2561.88
ENSMUSG00000031176	2295.88	2391.39	2262.1	2736.15	2596.11	2400.96
ENSMUSG00000009471	2717.14	2416.34	2574.02	2105.1	2490.01	2349.46
ENSMUSG00000029840	2419.9	2271.26	2290.06	2681.23	2599.57	2420.27
ENSMUSG00000039100	2435.28	2385.84	2352.09	2530.94	2461.17	2482.49
ENSMUSG00000031818	2397.35	2416.34	2592.37	2279.48	2522.3	2408.47
ENSMUSG00000019920	2299.98	2384	2328.5	2632.1	2530.37	2457.82
ENSMUSG00000022812	2433.23	2479.17	2340.73	2550.21	2360.84	2423.49
ENSMUSG00000002020	2405.55	2310.07	2246.37	2538.64	2636.48	2508.24
ENSMUSG00000002233	2398.38	2422.81	2393.16	2281.41	2660.7	2461.03
ENSMUSG00000031278	2191.34	2221.37	2110.07	2913.42	2596.11	2614.45
ENSMUSG00000061731	2350.21	2529.99	2437.72	2566.58	2340.08	2305.48
ENSMUSG00000059248	2626.94	2325.78	2475.29	2244.8	2517.69	2390.23
ENSMUSG00000022800	2363.53	2234.3	2321.51	2646.55	2686.07	2354.83
ENSMUSG00000026657	2401.45	2315.62	2386.17	2523.23	2401.2	2542.57
ENSMUSG00000020277	2273.34	2289.74	2325.01	2405.69	2722.98	2611.23
ENSMUSG00000058793	2363.53	2157.61	2168.61	2634.02	2646.86	2678.81
ENSMUSG00000034354	2380.96	2384.92	2412.38	2521.3	2397.74	2454.6
ENSMUSG00000032547	2465	2374.76	2489.27	2418.22	2438.11	2358.04
ENSMUSG00000015501	2501.9	2371.06	2196.57	2510.71	2449.64	2559.73
ENSMUSG00000053838	2378.91	2225.06	2421.99	2384.5	2676.84	2484.64
ENSMUSG00000059602	2267.19	2318.39	2271.71	2756.38	2420.81	2497.51
ENSMUSG00000026421	2482.43	2296.21	2645.67	2324.76	2363.14	2362.33
ENSMUSG00000003072	2576.72	2588.21	2508.49	1922.05	2434.65	2473.91
ENSMUSG00000079435	2137.02	2405.25	2323.26	2661	2472.71	2514.67
ENSMUSG00000016541	2314.33	2274.04	2330.25	2555.02	2579.97	2491.07
ENSMUSG00000003731	2422.98	2336.87	2441.21	2392.2	2507.31	2413.83
ENSMUSG00000028530	2326.63	2210.28	2415.87	2550.21	2532.68	2484.64
ENSMUSG00000021996	2289.73	2239.85	2318.02	2552.13	2592.65	2544.71
ENSMUSG00000025781	2384.03	2307.3	2321.51	2464.46	2509.61	2518.97
ENSMUSG00000030681	2356.36	2486.56	2333.74	2240.94	2729.9	2366.63
ENSMUSG00000001280	2366.61	2517.06	2327.63	2501.07	2381.6	2358.04
ENSMUSG00000022175	2484.48	2339.64	2415	2207.22	2485.39	2555.44
ENSMUSG00000029598	2477.3	2311	2434.22	2246.72	2496.93	2516.82
ENSMUSG00000021427	2345.08	2267.57	2373.93	2619.57	2340.08	2501.8
ENSMUSG00000021039	2316.38	2338.72	2567.9	2330.54	2466.94	2414.9
ENSMUSG00000026407	2200.56	2179.79	1992.99	2572.36	2567.28	3052.15
ENSMUSG00000039062	2283.59	2385.84	2202.68	2450.97	2636.48	2537.2
ENSMUSG00000006920	2444.5	2327.63	2328.5	2310.31	2492.31	2567.24
ENSMUSG00000026229	2402.48	2405.25	2313.65	2522.27	2410.43	2378.43
ENSMUSG00000048285	2378.91	2327.63	2373.06	2542.5	2378.14	2418.12
ENSMUSG00000017776	2440.4	2392.31	2404.52	2519.38	2287.02	2348.39
ENSMUSG00000005534	2410.68	2369.21	2275.2	2454.83	2443.87	2488.93
ENSMUSG00000028412	2249.76	2199.19	2232.39	2545.39	2581.12	2663.8
ENSMUSG00000028618	2334.83	2477.32	2439.46	2343.07	2427.73	2365.55
ENSMUSG00000074884	2463.98	2354.43	2565.28	2314.17	2448.49	2226.09
ENSMUSG00000026817	2451.68	2381.22	2522.47	2201.44	2406.97	2423.49
ENSMUSG00000025871	2418.88	2434.82	2413.25	2271.77	2266.26	2574.75
ENSMUSG00000040848	2467.05	2539.23	2543.44	2229.38	2285.87	2259.34
ENSMUSG00000033623	2475.25	2378.45	2381.8	2531.9	2312.4	2262.56
ENSMUSG00000020780	2358.41	2481.02	2504.99	2172.54	2423.11	2410.61
ENSMUSG00000008730	2447.58	2319.31	2233.26	2439.41	2483.09	2480.34
ENSMUSG00000002748	2376.86	2345.19	2394.9	2597.41	2253.58	2359.12
ENSMUSG00000041120	2433.23	2440.36	2570.53	2144.6	2367.76	2350.53
ENSMUSG00000055737	2331.76	2391.39	2342.48	2515.52	2434.65	2314.06
ENSMUSG00000038762	2390.18	2208.43	2564.41	2424	2372.37	2351.61
ENSMUSG00000058569	2355.33	2444.98	2544.31	2254.43	2486.55	2217.51
ENSMUSG00000022016	2318.43	2243.54	2252.49	2638.84	2330.85	2564.02
ENSMUSG00000039361	2427.08	2409.87	2362.58	2515.52	2239.74	2336.59
ENSMUSG00000012405	2356.36	2248.16	2446.45	2358.48	2487.7	2425.63
ENSMUSG00000026883	2466.03	2528.14	2446.45	2195.66	2289.33	2351.61
ENSMUSG00000030058	2353.28	2354.43	2304.04	2519.38	2383.9	2395.59
ENSMUSG00000021288	2364.56	2283.28	2335.49	2317.06	2545.37	2477.13
ENSMUSG00000037652	2472.18	2416.34	2276.95	2562.73	2245.5	2287.24
ENSMUSG00000074698	2274.36	2269.42	2252.49	2438.45	2583.43	2514.67
ENSMUSG00000020152	2252.84	2313.77	2387.04	2590.67	2315.86	2398.81
ENSMUSG00000064210	2440.4	2328.55	2403.64	2460.61	2231.66	2344.1
ENSMUSG00000001472	2262.06	2320.24	2362.58	2388.35	2456.56	2462.11
ENSMUSG00000042626	2337.91	2410.79	2419.37	2179.28	2492.31	2407.39
ENSMUSG00000064302	2333.81	2187.18	2223.65	2555.02	2456.56	2525.4
ENSMUSG00000027642	2340.98	2432.05	2424.61	2290.08	2356.22	2348.39
ENSMUSG00000022995	2412.73	2268.49	2369.57	2490.47	2356.22	2288.31
ENSMUSG00000041168	2404.53	2335.02	2319.76	2178.32	2551.13	2446.01
ENSMUSG00000026604	2332.78	2314.69	2356.46	2547.32	2193.6	2412.76
ENSMUSG00000060802	2325.61	2352.58	2187.83	2369.08	2611.1	2392.37
ENSMUSG00000035152	2319.46	2257.4	2347.72	2447.12	2347	2470.69
ENSMUSG00000014599	2426.05	2318.39	2535.58	2401.84	2270.88	2177.81
ENSMUSG00000024163	2291.78	2280.5	2301.41	2214.93	2548.83	2595.14
ENSMUSG00000032393	2338.93	2337.79	2151.13	2632.1	2278.95	2432.07
ENSMUSG00000003435	2415.8	2410.79	2499.75	2156.16	2363.14	2284.02
ENSMUSG00000029407	2314.33	2371.06	2259.48	2520.34	2321.62	2364.48
ENSMUSG00000040481	2304.08	2395.08	2392.28	2467.35	2220.13	2324.79
ENSMUSG00000061306	2458.85	2359.05	2397.53	2186.03	2456.56	2277.58
ENSMUSG00000042548	2286.66	2281.43	2365.2	2349.81	2477.32	2383.79
ENSMUSG00000034868	2235.41	2591.9	2166.86	2351.74	2397.74	2391.3
ENSMUSG00000054823	2415.8	2253.71	2351.22	2422.07	2180.92	2490
ENSMUSG00000006445	2468.08	2474.55	2523.34	2089.69	2182.07	2335.51
ENSMUSG00000066232	2364.56	2325.78	2221.03	2543.46	2195.91	2444.94
ENSMUSG00000093930	2093.97	2254.63	2203.56	2609.94	2390.82	2572.61
ENSMUSG00000043940	2251.81	2372.91	2351.22	2355.59	2258.19	2492.15
ENSMUSG00000051853	2459.88	2353.5	2330.25	2362.34	2293.94	2247.54
ENSMUSG00000031453	2331.76	2365.52	2420.24	2206.26	2408.12	2318.35
ENSMUSG00000018076	2536.75	2384.92	2330.25	2397.02	2131.33	2196.05
ENSMUSG00000026277	2211.84	2327.63	2341.61	2278.52	2491.16	2381.65
ENSMUSG00000024913	2230.29	2278.66	2312.77	2127.26	2629.56	2468.54
ENSMUSG00000036817	2223.11	2184.41	2142.4	2434.59	2523.45	2549
ENSMUSG00000030795	2297.93	2235.23	2430.73	2507.81	2374.68	2109.15
ENSMUSG00000030180	2330.73	2362.74	2324.13	2414.36	2268.57	2247.54
ENSMUSG00000024431	2229.26	2267.57	2215.79	2501.07	2416.19	2329.08
ENSMUSG00000001424	2299.98	2167.77	2324.13	2365.23	2481.93	2320.5
ENSMUSG00000043079	2531.62	2384.92	2332.87	2216.86	2240.89	2192.83
ENSMUSG00000025791	2058.1	2072.6	2019.2	2409.54	2787.56	2708.85
ENSMUSG00000015087	2322.53	2312.85	2343.35	2234.2	2308.94	2392.37
ENSMUSG00000037206	2412.73	2503.2	2580.14	2128.22	2100.19	2089.84
ENSMUSG00000017221	2373.78	2369.21	2420.24	2076.2	2317.01	2331.22
ENSMUSG00000032883	2349.18	2268.49	2450.82	2384.5	2248.96	2153.14
ENSMUSG00000015002	2275.39	2198.27	2240.25	2497.22	2202.83	2464.25
ENSMUSG00000022246	2235.41	2247.24	2205.3	2534.79	2359.68	2299.04
ENSMUSG00000064360	2166.74	2185.33	2077.74	2753.49	2381.6	2320.5
ENSMUSG00000047866	2252.84	2239.85	2220.16	2424.96	2313.55	2420.27
ENSMUSG00000068739	2331.76	2281.43	2336.36	2190.85	2463.48	2264.71
ENSMUSG00000029328	2342.01	2245.39	2380.05	2449.05	2147.47	2243.25
ENSMUSG00000024597	2124.72	2166.85	2055.9	2549.24	2445.03	2546.86
ENSMUSG00000021109	2213.89	2223.21	2332	2490.47	2276.64	2261.49
ENSMUSG00000043336	2355.33	2375.68	2473.54	2357.52	2027.53	2142.41
ENSMUSG00000002028	2286.66	2163.15	2369.57	2485.66	2156.7	2323.71
ENSMUSG00000032187	2304.08	2312.85	2384.42	2167.72	2277.8	2353.75
ENSMUSG00000001768	2383.01	2222.29	2417.62	2303.57	2320.47	2140.26
ENSMUSG00000041408	2283.59	2239.85	2254.23	2504.92	2317.01	2201.41
ENSMUSG00000034525	2427.08	2374.76	2345.1	2312.24	2057.51	2238.96
ENSMUSG00000042524	2127.79	2336.87	2366.95	2323.8	2187.84	2432.07
ENSMUSG00000032340	2285.64	2308.23	2220.16	2297.79	2386.21	2315.13
ENSMUSG00000029502	2106.27	2347.03	2202.68	2396.06	2425.42	2312.99
ENSMUSG00000025907	2292.81	2280.5	2208.8	2516.49	2263.96	2203.56
ENSMUSG00000025583	2346.11	2201.96	2075.99	2213.97	2463.48	2544.71
ENSMUSG00000029512	2295.88	2172.39	2249.86	2255.4	2421.96	2395.59
ENSMUSG00000027087	2314.33	2079.07	2068.13	2668.71	2292.79	2365.55
ENSMUSG00000053754	2253.86	2380.3	2195.69	2318.98	2233.97	2366.63
ENSMUSG00000001441	2183.14	2252.78	2242.87	2391.24	2435.8	2259.34
ENSMUSG00000021950	2271.29	2380.3	2259.48	2344.99	2245.5	2219.65
ENSMUSG00000025579	2408.63	2096.62	2308.4	2141.71	2477.32	2347.32
ENSMUSG00000037266	2372.76	2433.89	2392.28	2322.84	2029.83	2096.28
ENSMUSG00000043866	2383.01	2383.07	2385.29	2151.34	2122.1	2252.91
ENSMUSG00000021171	2205.69	2230.61	2283.07	2434.59	2277.8	2273.29
ENSMUSG00000027303	2214.91	2269.42	2138.9	2220.71	2485.39	2437.43
ENSMUSG00000023088	2294.86	2327.63	2217.54	2238.05	2383.9	2235.74
ENSMUSG00000059751	2169.82	2313.77	2206.18	2244.8	2516.53	2263.64
ENSMUSG00000020184	2397.35	2343.34	2346.85	2210.11	2254.73	2054.44
ENSMUSG00000024091	2376.86	2302.68	2279.57	2127.26	2248.96	2278.66
ENSMUSG00000085438	2157.52	2309.15	2134.53	2529.97	2207.44	2264.71
ENSMUSG00000025060	2253.86	2233.38	2213.17	2450.01	2252.42	2190.68
ENSMUSG00000091957	2224.14	2233.38	2200.06	2344.03	2343.54	2253.98
ENSMUSG00000004535	2183.14	2343.34	2172.98	2370.04	2343.54	2171.37
ENSMUSG00000028809	2152.39	2193.65	2222.78	2459.64	2332	2225.01
ENSMUSG00000018765	2405.55	2238.92	2281.32	2158.09	2155.55	2328
ENSMUSG00000055980	2320.48	2230.61	2359.96	2295.86	2252.42	2085.55
ENSMUSG00000016128	2221.06	2347.96	2257.73	2203.37	2283.56	2252.91
ENSMUSG00000001555	2393.25	2246.32	2374.81	2185.07	2164.77	2147.77
ENSMUSG00000022994	2226.19	2240.77	2216.66	2238.05	2396.59	2248.62
ENSMUSG00000025224	2436.3	2198.27	2159	2229.38	2233.97	2287.24
ENSMUSG00000061032	2275.39	2291.59	2182.59	2210.11	2349.3	2230.38
ENSMUSG00000005871	2298.96	2259.25	2133.66	2399.91	2141.71	2262.56
ENSMUSG00000066324	2148.29	2220.44	2108.32	2448.08	2274.34	2311.91
ENSMUSG00000021140	2286.66	2288.82	2048.03	2212.04	2251.27	2446.01
ENSMUSG00000022200	2405.55	2231.53	2298.79	2168.69	2161.31	2191.76
ENSMUSG00000038859	2303.06	2205.66	2084.73	2405.69	2209.75	2278.66
ENSMUSG00000057637	2376.86	2307.3	2261.22	2207.22	2044.83	2235.74
ENSMUSG00000006299	2252.84	2213.05	2431.6	2029.95	2247.81	2260.42
ENSMUSG00000026586	2144.19	2272.19	2121.43	2358.48	2333.16	2236.82
ENSMUSG00000000278	2096.02	2172.39	2146.76	2325.73	2436.95	2309.77
ENSMUSG00000028630	2335.86	2440.36	2277.82	2045.37	2177.46	2139.19
ENSMUSG00000021796	2257.96	2288.82	2148.51	2363.3	2178.61	2194.98
ENSMUSG00000073664	2149.32	2332.25	2113.56	2480.84	2214.36	2125.24
ENSMUSG00000040151	2298.96	2194.57	2209.67	2355.59	2183.23	2176.74
ENSMUSG00000009035	2261.04	2120.65	2215.79	2189.88	2225.9	2435.29
ENSMUSG00000029713	2348.16	2274.96	2267.34	2073.31	2242.04	2215.36
ENSMUSG00000031812	2346.11	2255.56	2330.25	1988.52	2312.4	2179.96
ENSMUSG00000029490	2401.45	2338.72	2377.43	2028.99	2127.87	2081.26
ENSMUSG00000031700	2173.92	2068.9	2138.03	2244.8	2457.71	2375.21
ENSMUSG00000022365	2346.11	2262.02	2116.18	2201.44	2199.37	2286.17
ENSMUSG00000009293	2238.49	2285.12	2322.38	2067.53	2160.16	2297.97
ENSMUSG00000058672	2212.86	2188.1	2170.35	2144.6	2329.7	2371.99
ENSMUSG00000015605	2291.78	2196.42	2366.07	1974.07	2161.31	2378.43
ENSMUSG00000023087	2244.64	2396.01	2290.06	2178.32	2250.12	1970.76
ENSMUSG00000025651	2350.21	2206.58	2155.5	1966.37	2381.6	2350.53
ENSMUSG00000052456	2285.64	2404.32	2377.43	1879.66	2125.56	2238.96
ENSMUSG00000026878	2227.21	2235.23	2208.8	2270.81	2257.04	2144.55
ENSMUSG00000005566	2261.04	2213.97	2272.58	2140.75	2284.72	2173.52
ENSMUSG00000030605	2188.27	2201.96	2249.86	2069.45	2333.16	2321.57
ENSMUSG00000032382	2242.59	2309.15	2290.06	2220.71	2153.24	2083.4
ENSMUSG00000021820	2023.25	2060.59	2089.97	2398.95	2431.19	2378.43
ENSMUSG00000075700	2203.64	2306.38	2046.28	2422.07	2258.19	2079.11
ENSMUSG00000001833	2091.92	2153.91	2228.9	2587.78	2131.33	2072.68
ENSMUSG00000024085	2159.57	2172.39	2182.59	2338.25	2247.81	2203.56
ENSMUSG00000020111	2109.34	2115.1	2028.81	2227.46	2521.15	2376.28
ENSMUSG00000063659	2266.16	2186.25	2223.65	2183.14	2227.05	2212.14
ENSMUSG00000000693	2253.86	2428.35	2312.77	2055	2153.24	2042.64
ENSMUSG00000034807	2295.88	2189.95	2255.98	2118.59	2278.95	2149.92
ENSMUSG00000054766	2280.51	2272.19	2384.42	2183.14	2039.06	2056.58
ENSMUSG00000073639	2120.62	2130.81	2186.08	2358.48	2327.39	2168.16
ENSMUSG00000030224	2225.16	2164.08	2214.04	2266.96	2328.54	2084.48
ENSMUSG00000041459	2171.87	2172.39	2119.68	2397.98	2235.12	2186.39
ENSMUSG00000038538	2022.22	2132.66	2180.84	2479.88	2180.92	2269
ENSMUSG00000071172	2357.38	2298.99	2469.17	2114.73	1976.78	1964.32
ENSMUSG00000030451	2208.76	2174.24	2251.61	2347.89	2032.14	2215.36
ENSMUSG00000034168	2337.91	2415.41	2315.39	1971.18	2088.65	2056.58
ENSMUSG00000022956	2169.82	2203.81	2256.85	2096.43	2323.93	2190.68
ENSMUSG00000031788	2212.86	2200.11	2138.9	2125.33	2270.88	2300.11
ENSMUSG00000048537	2313.31	2253.71	2149.39	2109.92	2124.41	2246.47
ENSMUSG00000021488	2187.24	2369.21	2255.11	2151.34	1973.32	2191.76
ENSMUSG00000070544	2106.27	2140.05	2200.94	2429.78	2157.85	2098.42
ENSMUSG00000074656	2163.67	2125.27	2209.67	2319.95	2215.52	2082.33
ENSMUSG00000024286	2225.16	2119.72	2166.86	2297.79	2159.01	2138.12
ENSMUSG00000015522	2104.22	2162.23	2093.47	2304.53	2225.9	2223.94
ENSMUSG00000030609	2354.31	2394.16	2363.45	1846.9	2012.53	2064.09
ENSMUSG00000010095	2134.97	2168.7	2242	2144.6	2332	2072.68
ENSMUSG00000029110	2129.84	2252.78	2257.73	2123.41	2139.4	2155.28
ENSMUSG00000035901	2076.55	2133.58	2165.99	2340.18	2168.23	2183.18
ENSMUSG00000031885	2155.47	2224.14	2142.4	2244.8	2222.44	2066.24
ENSMUSG00000026775	2244.64	2210.28	2073.37	2344.99	2024.07	2128.46
ENSMUSG00000035770	2082.7	2177.94	2024.44	2399.91	2200.52	2167.08
ENSMUSG00000027012	2039.65	2137.28	2100.46	2223.6	2239.74	2324.79
ENSMUSG00000021770	2161.62	2093.85	1896.88	2356.56	2176.31	2406.32
ENSMUSG00000026254	2151.37	2053.19	2156.38	2291.04	2170.54	2219.65
ENSMUSG00000032050	2082.7	2171.47	2141.52	2302.6	2140.55	2176.74
ENSMUSG00000021978	2175.97	2141.9	1987.74	2153.27	2238.58	2352.68
ENSMUSG00000030754	2050.92	2263.87	2062.89	2275.63	2280.1	2066.24
ENSMUSG00000027868	2193.39	2165.93	2179.09	2244.8	2047.13	2139.19
ENSMUSG00000027940	2129.84	2140.05	2061.14	2256.36	2243.2	2181.03
ENSMUSG00000022905	2154.44	2171.47	2110.07	2324.76	1968.71	2225.01
ENSMUSG00000025362	2143.17	2118.8	2336.36	1923.01	2237.43	2196.05
ENSMUSG00000037852	2105.24	2011.61	2083.86	2222.64	2319.32	2251.84
ENSMUSG00000006360	2198.51	2139.13	2341.61	2120.52	1965.25	2124.17
ENSMUSG00000044791	2123.69	2129.89	2177.34	2345.96	2044.83	2082.33
ENSMUSG00000030890	2193.39	2125.27	2179.09	2162.91	2132.48	2129.53
ENSMUSG00000026490	2066.3	2122.5	2003.47	2392.2	2205.14	2154.21
ENSMUSG00000004263	2254.89	2051.35	2401.02	1985.63	2125.56	2076.97
ENSMUSG00000046062	2220.04	2206.58	2115.31	2188.92	1943.34	2207.85
ENSMUSG00000031246	2097.04	2032.86	2125.79	2560.8	2064.43	1989
ENSMUSG00000047187	2161.62	2133.58	2176.47	2167.72	1987.16	2246.47
ENSMUSG00000032625	2152.39	2089.23	2106.57	2194.7	2188.99	2160.65
ENSMUSG00000021279	2087.82	2166.85	2124.05	2201.44	2182.07	2111.3
ENSMUSG00000004085	2146.24	2069.83	1937.94	2198.55	2285.87	2282.95
ENSMUSG00000050812	2018.12	1973.73	2075.99	2226.49	2278.95	2314.06
ENSMUSG00000040462	2104.22	2141.9	2214.92	2136.89	2124.41	2094.13
ENSMUSG00000011257	2184.17	2136.36	2107.45	2088.72	2134.79	2187.47
ENSMUSG00000037851	2071.42	2200.11	2099.58	2184.1	2140.55	2124.17
ENSMUSG00000031591	1939.2	2216.75	2048.91	2347.89	2085.19	2161.72
ENSMUSG00000040997	2111.39	2123.42	2207.05	2032.84	2160.16	2171.37
ENSMUSG00000030061	2027.35	2134.51	2251.61	2217.82	2170.54	1975.05
ENSMUSG00000041895	2013	2029.17	1998.23	2287.19	2274.34	2242.18
ENSMUSG00000043131	2091.92	2094.77	2112.69	2327.65	2084.04	2065.17
ENSMUSG00000050565	2133.94	2079.07	2213.17	2215.89	2018.3	2087.69
ENSMUSG00000040407	2168.79	2189.95	2089.1	2171.58	2077.12	2061.95
ENSMUSG00000022680	2121.64	2032.86	2032.3	2217.82	2153.24	2237.89
ENSMUSG00000010608	2108.32	2201.96	2141.52	2306.46	2037.91	1928.92
ENSMUSG00000023025	2115.49	2054.12	1992.99	2457.72	2097.88	2051.22
ENSMUSG00000028760	2030.42	2127.12	2043.66	2191.81	2171.69	2213.21
ENSMUSG00000016933	2126.77	1973.73	2100.46	2179.28	2163.62	2242.18
ENSMUSG00000056537	2158.54	1969.11	1986.87	2358.48	2212.06	2107.01
ENSMUSG00000001131	2008.9	1974.65	2158.12	2271.77	2195.91	2152.06
ENSMUSG00000017615	2072.45	2151.14	2113.56	2082.94	2167.08	2171.37
ENSMUSG00000020964	2165.72	2033.79	2027.94	2305.49	2015.99	2194.98
ENSMUSG00000020484	2122.67	2043.03	2301.41	2071.38	2040.21	2117.73
ENSMUSG00000032966	2008.9	2031.02	2145.89	2126.3	2265.11	2166.01
ENSMUSG00000029430	2292.81	2161.3	2149.39	2118.59	2001	1952.52
ENSMUSG00000049807	2374.81	2132.66	2148.51	2013.57	1951.41	2060.87
ENSMUSG00000022185	2042.72	2090.15	2318.89	2056.93	2063.28	2088.77
ENSMUSG00000038127	2094.99	2104.94	2051.53	2306.46	1988.31	2124.17
ENSMUSG00000027829	2044.77	1925.68	1998.23	2311.27	2160.16	2280.8
ENSMUSG00000020099	2114.47	2035.64	2110.94	2118.59	2216.67	2095.2
ENSMUSG00000028556	2068.35	2060.59	2186.08	2227.46	2040.21	2060.87
ENSMUSG00000037679	2128.82	2029.17	2334.62	1891.22	2148.63	2117.73
ENSMUSG00000014313	2166.74	2005.14	2170.35	2104.14	2195.91	2015.82
ENSMUSG00000039103	2090.89	2067.05	2049.78	2298.75	2085.19	2054.44
ENSMUSG00000021190	2023.25	2113.26	2148.51	2065.6	2137.09	2148.84
ENSMUSG00000060261	2103.19	2022.7	2073.37	2140.75	2200.52	2117.73
ENSMUSG00000021794	2049.9	2139.13	2088.22	2088.72	2095.57	2167.08
ENSMUSG00000024002	2181.09	2101.24	2201.81	2069.45	1994.08	2044.78
ENSMUSG00000036686	2240.54	2064.28	2056.77	2012.61	2085.19	2179.96
ENSMUSG00000041577	2176.99	2004.22	2081.23	2180.25	2124.41	2059.8
ENSMUSG00000036707	2149.32	2183.48	2096.96	2084.87	1983.7	2096.28
ENSMUSG00000035671	2227.21	2168.7	2183.46	1818	2176.31	2040.49
ENSMUSG00000039536	2105.24	2076.29	2035.8	2073.31	2084.04	2253.98
ENSMUSG00000018398	2106.27	1947.85	1919.59	2221.68	2231.66	2228.23
ENSMUSG00000033542	2035.55	2104.94	1942.31	2232.27	2102.49	2198.19
ENSMUSG00000036046	2057.07	2130.81	2119.68	2051.15	2107.11	2122.02
ENSMUSG00000020823	2193.39	2079.99	2078.61	2010.68	2099.03	2140.26
ENSMUSG00000037608	2061.17	2090.15	2038.42	2325.73	1992.93	2063.02
ENSMUSG00000021493	2317.41	2158.53	2219.28	1978.89	1886.82	1975.05
ENSMUSG00000032324	1996.6	2064.28	2093.47	2119.55	2100.19	2214.29
ENSMUSG00000029152	1988.4	2082.76	2023.57	2191.81	2162.47	2146.7
ENSMUSG00000030120	2280.51	2017.16	2197.44	1933.61	2055.21	2087.69
ENSMUSG00000036057	2139.07	1994.98	2145.89	2033.81	2147.47	2126.32
ENSMUSG00000044734	1549.72	1582.86	1575.34	2565.62	2668.77	2844.03
ENSMUSG00000003865	1902.3	1931.22	1807.76	2199.52	2411.58	2427.78
ENSMUSG00000014195	2087.82	2107.71	2083.86	2088.72	2174	2029.76
ENSMUSG00000031960	2110.37	2175.17	2141.52	2021.28	2054.05	2040.49
ENSMUSG00000022568	2158.54	2134.51	1982.5	1957.69	2156.7	2204.63
ENSMUSG00000005481	2159.57	2205.66	2328.5	1906.63	2025.22	1864.55
ENSMUSG00000014349	1961.75	2081.84	2090.85	2051.15	2300.86	2089.84
ENSMUSG00000025283	2023.25	1993.13	2120.55	2072.34	2222.44	2134.9
ENSMUSG00000034892	2083.72	2128.96	2107.45	1871.95	2255.88	2119.88
ENSMUSG00000037573	2310.23	2121.57	2048.91	1964.44	2009.07	2072.68
ENSMUSG00000058013	2007.87	2013.46	1936.19	2256.36	2209.75	2137.04
ENSMUSG00000001017	2107.29	2164.08	2078.61	2042.48	2064.43	2055.51
ENSMUSG00000053110	2025.3	2053.19	2066.38	2089.69	2184.38	2119.88
ENSMUSG00000033004	1998.65	2139.13	1981.63	2255.4	1971.02	2163.86
ENSMUSG00000016528	1991.47	2079.07	2043.66	2048.26	2050.59	2316.2
ENSMUSG00000052459	2020.17	2099.39	2040.17	2244.8	2017.15	2075.89
ENSMUSG00000020664	2116.52	2072.6	1982.5	2179.28	2066.74	2095.2
ENSMUSG00000040054	2073.47	2103.09	1980.75	2027.06	2079.43	2260.42
ENSMUSG00000097799	1972	2080.91	1892.51	2378.71	2066.74	2115.59
ENSMUSG00000048874	2100.12	1902.58	2135.41	2099.32	2167.08	2096.28
ENSMUSG00000029505	2038.62	2020.85	2048.91	2191.81	2015.99	2160.65
ENSMUSG00000009073	2046.82	2262.95	2172.1	1980.82	1998.69	1962.18
ENSMUSG00000037916	2104.22	2128.04	2065.51	1921.08	2081.73	2178.88
ENSMUSG00000019210	2018.12	2031.02	2098.71	2059.82	2170.54	2103.79
ENSMUSG00000054408	1934.08	2011.61	1947.55	2223.6	2246.66	2145.63
ENSMUSG00000021959	2179.04	2080.91	2071.62	2075.23	2069.05	1985.78
ENSMUSG00000023905	2000.7	2057.81	2237.63	1980.82	2010.23	2149.92
ENSMUSG00000038650	1938.18	2046.73	2209.67	1949.02	2162.47	2155.28
ENSMUSG00000026926	2127.79	1991.28	2048.91	2057.89	2122.1	2119.88
ENSMUSG00000038250	2137.02	2122.5	2096.09	2007.79	1945.64	2119.88
ENSMUSG00000036309	1962.78	2002.37	2001.72	2238.05	2125.56	2114.51
ENSMUSG00000015755	2110.37	2062.43	2069	2086.79	2148.63	1954.67
ENSMUSG00000025544	2007.87	2115.1	2036.67	2133.04	2034.45	2079.11
ENSMUSG00000027907	2103.19	2055.97	2116.18	1961.55	2131.33	2043.71
ENSMUSG00000024908	2145.22	2165	2006.09	2008.76	2002.15	2074.82
ENSMUSG00000032280	2137.02	2289.74	2104.82	1776.57	2089.81	1983.63
ENSMUSG00000024735	2102.17	2113.26	2070.75	1945.17	2021.76	2129.53
ENSMUSG00000097412	1946.38	2067.98	2100.46	2246.72	1984.85	2006.16
ENSMUSG00000045817	2183.14	2021.78	2138.9	1949.99	1953.72	2114.51
ENSMUSG00000027782	2037.6	2167.77	1948.43	2139.78	1980.24	2087.69
ENSMUSG00000056050	2058.1	1995.9	1901.24	2294.9	2032.14	2093.06
ENSMUSG00000032328	1972	2066.13	1921.34	2319.95	2066.74	2013.67
ENSMUSG00000026833	1965.85	1959.87	2045.41	2127.26	2017.15	2251.84
ENSMUSG00000042699	2111.39	2155.76	2078.61	2216.86	1832.62	1894.59
ENSMUSG00000036450	2048.87	2119.72	2005.22	2015.5	1952.56	2194.98
ENSMUSG00000035357	1955.6	1893.34	1993.86	2224.57	2073.66	2219.65
ENSMUSG00000024538	2016.07	2111.41	2228.9	2006.83	2001	1916.04
ENSMUSG00000031065	2113.44	1881.32	2131.04	2000.09	2006.77	2200.34
ENSMUSG00000020321	1980.2	1825.88	1964.15	2116.66	2112.87	2378.43
ENSMUSG00000025364	2181.09	2140.05	2113.56	1991.42	1992.93	1861.33
ENSMUSG00000025862	2004.8	2120.65	1964.15	2240.94	2005.61	1957.88
ENSMUSG00000025764	1976.1	2020.85	2057.64	2135.93	2013.69	2097.35
ENSMUSG00000031558	2089.87	2044.88	2141.52	2095.47	1987.16	1910.68
ENSMUSG00000031626	1914.6	1973.73	1932.7	2302.6	2145.17	2046.93
ENSMUSG00000047213	2067.32	2035.64	2027.94	2177.36	1942.18	2015.82
ENSMUSG00000030116	2123.69	2152.99	2093.47	1884.47	1966.4	2043.71
ENSMUSG00000032637	2157.52	1964.49	1896.88	2077.16	2127.87	2087.69
ENSMUSG00000004677	1952.53	2185.33	1943.18	1912.41	2153.24	2148.84
ENSMUSG00000028991	1963.8	2088.31	2059.39	2031.88	2111.72	2012.6
ENSMUSG00000042323	2112.42	1999.6	1944.93	2249.62	1927.19	2026.54
ENSMUSG00000001036	1982.25	1980.2	1946.68	2005.87	2092.11	2299.04
ENSMUSG00000049878	2038.62	2056.89	2053.27	2035.73	2050.59	2010.45
ENSMUSG00000039703	2161.62	2108.64	1961.53	2048.26	1915.66	2036.2
ENSMUSG00000021111	2004.8	2073.52	1949.3	2167.72	2092.11	1956.81
ENSMUSG00000022354	2008.9	2001.45	2114.44	1907.6	2104.8	2111.3
ENSMUSG00000020889	2369.68	2279.58	2324.13	1521.26	1845.3	1815.2
ENSMUSG00000067288	1977.13	1976.5	2098.71	1841.12	2298.56	2061.95
ENSMUSG00000035168	1989.43	2076.29	2002.6	2173.5	1987.16	1958.96
ENSMUSG00000023075	2024.27	1984.82	2090.85	2008.76	2047.13	2046.93
ENSMUSG00000018377	2078.6	2009.76	2122.3	2023.21	2007.92	1937.5
ENSMUSG00000007880	2126.77	2058.74	1999.1	1930.72	2019.45	2072.68
ENSMUSG00000063882	1948.43	2018.08	2068.13	1940.35	2104.8	2126.32
ENSMUSG00000018326	2024.27	2065.21	2149.39	2071.38	1935.26	1894.59
ENSMUSG00000017485	1967.9	2030.09	1919.59	2185.07	2044.83	2031.91
ENSMUSG00000021009	2013	2035.64	2010.46	2015.5	2025.22	2073.75
ENSMUSG00000032777	2023.25	2024.55	2045.41	2002.01	1943.34	2123.1
ENSMUSG00000039087	2116.52	1984.82	1989.49	1977.93	1958.33	2145.63
ENSMUSG00000000171	1998.65	1893.34	2092.59	1978.89	2197.06	2011.52
ENSMUSG00000031561	1969.95	2011.61	2018.33	2061.75	2009.07	2049.07
ENSMUSG00000032383	1997.62	2033.79	2207.93	1892.18	1964.1	1987.92
ENSMUSG00000072720	1941.25	2118.8	1833.97	1980.82	2071.35	2181.03
ENSMUSG00000048376	2034.52	1970.03	2075.12	2013.57	2049.44	1942.86
ENSMUSG00000030824	1968.93	2114.18	2088.22	1895.07	2108.26	1895.66
ENSMUSG00000060904	1965.85	2022.7	2009.59	2071.38	1976.78	2021.18
ENSMUSG00000048271	2083.72	2004.22	1879.4	2069.45	2009.07	2046.93
ENSMUSG00000041548	2093.97	1983.89	1916.97	1973.11	2049.44	2083.4
ENSMUSG00000067851	2028.37	1980.2	1911.73	2200.48	1968.71	1978.27
ENSMUSG00000029528	2083.72	1946.01	2074.24	1881.58	2092.11	1997.58
ENSMUSG00000020570	1969.95	2023.62	1980.75	2015.5	2054.05	2021.18
ENSMUSG00000027479	1921.78	1954.32	2003.47	2217.82	1881.06	2054.44
ENSMUSG00000002741	2050.92	1999.6	2047.16	2056.93	1926.04	1948.23
ENSMUSG00000055296	1923.83	1955.25	1824.36	2184.1	2117.49	2086.62
ENSMUSG00000079562	2096.02	2022.7	2109.19	1840.16	2029.83	1938.57
ENSMUSG00000047250	1922.8	1925.68	1842.7	2102.21	2152.09	2143.48
ENSMUSG00000038335	1999.67	2116.95	2160.74	1939.39	1776.1	1938.57
ENSMUSG00000062203	2066.3	2027.32	1938.82	2108.95	1871.83	1936.43
ENSMUSG00000021807	1940.23	2003.3	1876.78	2106.06	2139.4	1922.48
ENSMUSG00000021458	2044.77	2039.33	2108.32	1896.04	1822.24	2015.82
ENSMUSG00000037470	2007.87	2128.96	1972.89	2000.09	1893.74	1926.77
ENSMUSG00000030884	1915.63	1933.99	1983.38	1951.91	2123.25	2065.17
ENSMUSG00000025369	1975.08	1901.65	2147.64	2057.89	1983.7	1849.53
ENSMUSG00000018819	2106.27	2161.3	2046.28	1870.99	1885.67	1828.07
ENSMUSG00000031007	1957.65	2000.52	2007.84	2092.58	2012.53	1851.68
ENSMUSG00000003808	2006.85	1922.91	2136.28	1847.86	1924.88	2080.18
ENSMUSG00000062611	1885.91	2035.64	1935.32	1944.21	2146.32	2008.31
ENSMUSG00000073002	2049.9	2223.21	2118.8	1711.06	1844.15	1931.06
ENSMUSG00000001098	1855.16	2091.08	2112.69	1986.6	1892.59	1939.65
ENSMUSG00000069662	2003.77	2072.6	2020.07	2174.47	1801.48	1789.45
ENSMUSG00000033400	1845.93	1918.29	1797.27	2104.14	2156.7	2152.06
ENSMUSG00000029763	1874.63	2073.52	1840.96	1974.07	2055.21	2114.51
ENSMUSG00000018574	1923.83	2006.99	1991.24	1998.16	1996.39	1972.9
ENSMUSG00000004317	1915.63	1858.22	1900.37	2260.21	1937.57	2023.33
ENSMUSG00000029581	2089.87	1964.49	2114.44	1780.42	1896.05	2014.74
ENSMUSG00000036545	2091.92	2021.78	2011.34	1853.64	1927.19	1962.18
ENSMUSG00000033730	2249.76	1910.89	1967.65	1806.44	1867.22	2082.33
ENSMUSG00000000628	1746.51	1773.21	1910.86	2116.66	2221.28	2160.65
ENSMUSG00000037503	1948.43	2017.16	2056.77	1971.18	1931.8	1906.39
ENSMUSG00000016256	1973.03	2020.85	1986	1821.85	2109.41	1953.59
ENSMUSG00000029426	1931	2071.67	1966.77	2042.48	2024.07	1794.82
ENSMUSG00000041189	2001.72	1949.7	1857.56	1952.88	2052.9	2069.46
ENSMUSG00000032423	1849.01	1986.66	1919.59	2224.57	1983.7	1868.84
ENSMUSG00000026207	1929.98	1956.17	1972.89	1983.71	2037.91	1969.69
ENSMUSG00000070565	1850.03	1927.53	2023.57	2043.44	1936.42	2050.15
ENSMUSG00000030062	1983.28	1921.98	1998.23	2005.87	1935.26	1989
ENSMUSG00000066568	1969.95	2039.33	2041.92	1945.17	1938.72	1876.35
ENSMUSG00000024042	2029.4	1999.6	2066.38	1866.17	1965.25	1888.15
ENSMUSG00000054263	1937.15	1885.02	1887.27	2219.75	1943.34	1962.18
ENSMUSG00000026463	2014.02	1986.66	2038.42	2112.81	1802.63	1828.07
ENSMUSG00000032116	1917.68	1916.44	1868.04	2152.31	2030.99	1953.59
ENSMUSG00000014959	1972	1862.84	2033.18	2020.32	1916.81	2006.16
ENSMUSG00000022710	1911.53	1968.18	2042.79	2013.57	1906.43	1947.16
ENSMUSG00000028382	1929.98	1992.21	1867.17	2201.44	1911.04	1902.1
ENSMUSG00000001415	1916.65	2061.51	1916.1	1952.88	1966.4	1996.51
ENSMUSG00000042605	2002.75	1987.59	1968.52	1913.38	1891.44	2039.42
ENSMUSG00000025968	1858.23	1831.43	1823.48	2139.78	2019.45	2171.37
ENSMUSG00000039473	2044.77	1946.01	1833.97	2054.04	1885.67	2050.15
ENSMUSG00000033444	1927.93	1969.11	1951.92	1986.6	1953.72	2009.38
ENSMUSG00000070738	1926.9	1923.83	1935.32	1983.71	2063.28	1981.49
ENSMUSG00000037373	2016.07	1961.71	2045.41	1868.1	1947.95	1939.65
ENSMUSG00000032115	1963.8	2050.42	2005.22	1993.34	1863.76	1878.5
ENSMUSG00000041815	1913.58	2023.62	1943.18	1876.77	2021.76	2014.74
ENSMUSG00000029577	2082.7	1969.11	1878.53	1819.92	2048.29	2008.31
ENSMUSG00000001288	1985.33	1874.86	1930.08	1855.57	2012.53	2146.7
ENSMUSG00000090862	1983.28	1966.33	2044.54	1784.28	1983.7	1999.72
ENSMUSG00000005312	1993.52	1954.32	2036.67	1895.07	1921.42	1947.16
ENSMUSG00000035284	1865.41	1983.89	1852.32	2136.89	1974.48	1947.16
ENSMUSG00000025228	1916.65	1902.58	1987.74	1900.85	2059.82	1999.72
ENSMUSG00000018846	1896.15	1906.27	1816.49	2222.64	1904.12	2012.6
ENSMUSG00000038172	1929.98	1841.59	1778.92	2146.53	2004.46	2080.18
ENSMUSG00000002524	1977.13	2015.31	2062.01	1720.69	1964.1	1985.78
ENSMUSG00000010453	2055.02	1954.32	1909.98	1860.39	1947.95	2008.31
ENSMUSG00000097417	1897.18	1798.16	1957.16	2100.28	2027.53	1953.59
ENSMUSG00000026977	1916.65	1950.63	1908.23	2165.8	1867.22	1887.08
ENSMUSG00000022146	1850.03	1820.34	1732.61	2160.02	2187.84	2028.69
ENSMUSG00000029364	1828.51	1914.59	1979.01	1975.04	1876.44	2129.53
ENSMUSG00000042506	1984.3	2059.66	1908.23	1872.91	1923.73	1947.16
ENSMUSG00000013663	1974.05	2140.98	1834.84	1987.56	1901.82	1834.51
ENSMUSG00000005615	1964.83	2003.3	1919.59	1903.74	1956.02	1909.61
ENSMUSG00000036591	1997.62	1947.85	1838.34	1996.23	1759.96	2115.59
ENSMUSG00000020790	1950.48	1970.95	1965.9	1960.59	1832.62	1952.52
ENSMUSG00000019849	1873.61	1969.11	1898.62	1929.76	1864.91	2117.73
ENSMUSG00000020741	1945.35	1972.8	2020.07	1815.11	1839.54	2039.42
ENSMUSG00000056429	1865.41	1950.63	1972.89	2110.88	1821.08	1894.59
ENSMUSG00000026842	2024.27	2083.69	1906.49	1808.36	1874.14	1937.5
ENSMUSG00000035969	1964.83	1939.54	1878.53	1833.41	2070.2	1987.92
ENSMUSG00000025980	1806.98	1959.87	2097.83	2068.49	1843	1795.89
ENSMUSG00000038056	1871.56	2023.62	1854.94	2071.38	1765.73	2021.18
ENSMUSG00000026393	1870.53	1865.62	1712.52	2147.49	2009.07	2056.58
ENSMUSG00000006169	1903.33	1944.16	1986	1897	1909.89	1965.39
ENSMUSG00000001333	1976.1	2044.88	1968.52	1968.29	1789.94	1818.42
ENSMUSG00000052310	1973.03	1955.25	1832.22	1925.9	1974.48	1967.54
ENSMUSG00000063511	2034.52	1914.59	1958.91	1882.55	1957.18	1857.04
ENSMUSG00000007836	2248.74	2057.81	2022.69	1698.53	1725.36	1803.4
ENSMUSG00000031714	2024.27	1911.82	2006.09	1802.58	1982.55	1862.4
ENSMUSG00000037149	1891.03	1792.62	1847.95	2111.84	1962.94	2001.87
ENSMUSG00000033960	1833.63	1873.93	1850.57	2001.05	2032.14	2012.6
ENSMUSG00000002015	1821.33	1808.33	1944.93	1991.42	2080.58	1948.23
ENSMUSG00000004383	1907.43	1854.53	1930.08	1986.6	1922.58	1968.61
ENSMUSG00000021365	1884.88	1824.96	2013.08	1961.55	1930.65	1943.94
ENSMUSG00000033487	1842.86	1822.19	1764.07	2054.04	2037.91	2087.69
ENSMUSG00000037613	1999.67	1907.2	1909.98	1873.88	1991.77	1888.15
ENSMUSG00000034075	1806.98	1873.93	1937.07	1976	1923.73	2034.05
ENSMUSG00000028580	2046.82	1855.45	1919.59	1975.04	1886.82	1861.33
ENSMUSG00000022150	1836.71	1819.41	1716.89	2092.58	2049.44	2088.77
ENSMUSG00000024493	1815.18	1970.03	1966.77	1954.8	1883.36	1914.97
ENSMUSG00000022241	1976.1	2036.56	1957.16	1851.72	1823.39	1850.6
ENSMUSG00000021832	1849.01	1873.93	1969.4	2012.61	1999.85	1807.69
ENSMUSG00000020496	2091.92	2043.03	2034.93	1717.8	1816.47	1774.43
ENSMUSG00000031386	2020.17	1912.74	1893.38	1937.46	1753.04	1987.92
ENSMUSG00000029447	1755.74	1943.23	2034.05	2010.68	1815.32	1914.97
ENSMUSG00000097057	1890.01	1958.94	1915.22	1890.25	1885.67	1965.39
ENSMUSG00000030704	2035.55	1908.12	1802.51	1972.15	1902.97	1890.3
ENSMUSG00000032867	1923.83	1933.99	2062.01	1747.67	1857.99	1946.08
ENSMUSG00000026547	1840.81	1853.6	2077.74	1795.84	1921.42	1979.34
ENSMUSG00000033335	1885.91	1852.68	1819.11	1893.14	2082.89	1991.14
ENSMUSG00000031393	1976.1	1827.73	1773.68	2114.73	1840.69	1955.74
ENSMUSG00000026750	1927.93	1970.95	1999.98	1855.57	1840.69	1844.17
ENSMUSG00000019802	1922.8	1817.57	1812.12	2112.81	2015.99	1808.76
ENSMUSG00000042599	1860.28	1946.93	1676.7	2003.94	1976.78	2039.42
ENSMUSG00000024474	1892.05	1871.16	1906.49	1870.99	2085.19	1858.11
ENSMUSG00000017831	1924.85	1889.64	1894.25	1952.88	1950.26	1844.17
ENSMUSG00000028035	1833.63	1727.94	1909.11	2026.1	2060.97	1919.26
ENSMUSG00000029076	1945.35	1806.48	1969.4	1882.55	1947.95	1883.86
ENSMUSG00000058690	1812.11	1840.67	1760.57	2141.71	1937.57	1961.1
ENSMUSG00000000826	1841.83	1942.31	1953.67	1915.3	1864.91	1884.93
ENSMUSG00000022346	1902.3	1808.33	1910.86	1811.25	1959.48	2050.15
ENSMUSG00000032086	1921.78	1984.82	1933.57	1817.03	1853.38	1888.15
ENSMUSG00000087231	2019.15	2026.4	1973.76	1562.69	1982.55	1845.24
ENSMUSG00000020074	2065.27	2043.03	2090.85	1930.72	1620.41	1539.49
ENSMUSG00000042133	1861.31	1878.55	1866.3	2021.28	1934.11	1817.35
ENSMUSG00000031955	2002.75	1937.69	2020.07	1665.77	1817.62	1913.9
ENSMUSG00000017300	1867.46	1933.07	2055.9	1628.2	1900.66	1978.27
ENSMUSG00000020530	2056.05	1865.62	1980.75	1903.74	1834.92	1700.41
ENSMUSG00000033184	1931	1866.54	1784.16	2050.18	1860.3	1877.42
ENSMUSG00000000441	1819.28	1864.69	1890.76	2005.87	1899.51	1867.77
ENSMUSG00000020869	1992.5	1950.63	1908.23	1919.16	1748.43	1800.18
ENSMUSG00000021945	1912.55	1933.07	1888.14	2030.92	1847.61	1712.21
ENSMUSG00000024750	1923.83	1851.76	1947.55	1859.42	1852.22	1907.46
ENSMUSG00000021775	1882.83	1891.49	1807.76	1967.33	1931.8	1868.84
ENSMUSG00000024283	1899.23	1918.29	1916.97	1887.36	1796.86	1890.3
ENSMUSG00000028793	1847.98	1845.29	2001.72	1812.22	1845.3	1961.1
ENSMUSG00000024966	1833.63	1933.99	1914.35	1910.49	1809.55	1888.15
ENSMUSG00000019188	1924.85	1883.17	1927.46	1810.29	1868.37	1883.86
ENSMUSG00000021486	1838.76	1756.58	1999.1	1794.87	1872.98	2042.64
ENSMUSG00000036499	1872.58	1832.35	1829.6	2048.26	1817.62	1872.06
ENSMUSG00000037058	1836.71	1845.29	1859.31	2061.75	1777.26	1869.91
ENSMUSG00000021096	1860.28	1820.34	1915.22	1903.74	1885.67	1879.57
ENSMUSG00000038976	1994.55	1881.32	1816.49	1706.24	2058.67	1846.31
ENSMUSG00000022822	1847.98	1930.3	1742.23	1947.1	1944.49	1867.77
ENSMUSG00000025887	1838.76	1826.81	1930.95	1913.38	1958.33	1787.31
ENSMUSG00000054008	1887.96	1897.03	1956.29	1814.14	1795.71	1870.99
ENSMUSG00000038886	1811.08	1847.13	1756.21	1906.63	1942.18	2015.82
ENSMUSG00000030779	1815.18	1997.75	1864.55	1908.56	1788.79	1842.02
ENSMUSG00000034158	1813.13	1859.15	1843.58	2093.54	1758.81	1846.31
ENSMUSG00000048000	1859.26	1914.59	1801.64	1951.91	1862.6	1846.31
ENSMUSG00000008690	1904.35	1879.48	1927.46	1709.13	1959.48	1861.33
ENSMUSG00000029998	1915.63	1796.31	1864.55	2019.35	1849.92	1778.72
ENSMUSG00000029705	1888.98	1783.38	1778.92	1971.18	1859.14	1970.76
ENSMUSG00000029169	1845.93	1884.1	1782.42	2027.06	1954.87	1724.01
ENSMUSG00000021178	1794.68	1932.15	1896.88	1779.46	1914.5	1888.15
ENSMUSG00000046312	1716.79	1794.47	1660.97	1864.24	2080.58	2155.28
ENSMUSG00000079254	1862.33	1897.03	1784.16	1941.32	1846.46	1855.97
ENSMUSG00000028410	1825.43	1770.44	1916.97	2063.67	1725.36	1851.68
ENSMUSG00000028433	1865.41	1770.44	1865.42	1918.19	1804.94	1960.03
ENSMUSG00000027006	1862.33	1875.78	1765.82	2044.4	1803.78	1819.49
ENSMUSG00000045838	1904.35	1846.21	1909.98	1910.49	1758.81	1819.49
ENSMUSG00000024066	1820.31	1919.21	1903.87	1934.57	1792.25	1769.07
ENSMUSG00000042211	1778.29	1951.55	1731.74	1928.79	1874.14	1879.57
ENSMUSG00000028759	1862.33	1719.62	1829.6	1949.99	1974.48	1815.2
ENSMUSG00000001403	1831.58	1824.03	1900.37	1739	1986.01	1862.4
ENSMUSG00000040761	1899.23	1869.31	1862.8	1915.3	1761.11	1791.6
ENSMUSG00000019428	1835.68	1862.84	1920.47	1755.37	1829.16	1905.32
ENSMUSG00000031545	1751.64	1901.65	1994.73	1758.26	1792.25	1886.01
ENSMUSG00000034543	1933.05	1793.54	1739.6	1960.59	1894.9	1814.13
ENSMUSG00000006281	1873.61	1847.13	1804.26	1852.68	1800.32	1911.75
ENSMUSG00000091243	1871.56	1876.7	1935.32	1893.14	1686.15	1778.72
ENSMUSG00000013033	1948.43	1781.53	1793.78	1781.39	1860.3	1936.43
ENSMUSG00000020390	1903.33	1787.07	1812.12	1854.61	1879.9	1853.82
ENSMUSG00000059208	1876.68	1932.15	1867.17	1862.32	1799.17	1703.63
ENSMUSG00000029238	1863.36	1825.88	1875.03	1913.38	1673.46	1889.22
ENSMUSG00000039000	1782.39	1743.64	1786.79	1984.67	1951.41	1837.73
ENSMUSG00000022390	1870.53	1950.63	1889.89	1826.67	1764.57	1718.65
ENSMUSG00000033009	1833.63	1904.42	1693.3	1951.91	1849.92	1828.07
ENSMUSG00000028645	1698.34	1660.48	1691.55	1785.24	2139.4	2171.37
ENSMUSG00000030894	1789.56	1899.8	1736.98	1816.07	1905.28	1919.26
ENSMUSG00000036112	1763.94	1847.13	1807.76	1979.85	1838.38	1789.45
ENSMUSG00000020300	1781.36	1797.24	1731.74	1988.52	1839.54	1909.61
ENSMUSG00000026965	1888.98	1847.13	1917.85	1775.61	1813.01	1765.85
ENSMUSG00000021037	1812.11	1939.54	1889.89	1768.86	1788.79	1801.25
ENSMUSG00000037465	1903.33	2004.22	1873.29	1701.42	1780.72	1733.67
ENSMUSG00000012889	1839.78	1814.79	1961.53	1667.7	1863.76	1872.06
ENSMUSG00000003464	1900.25	1828.65	1877.65	1816.07	1798.02	1788.38
ENSMUSG00000084349	1668.62	1744.57	1737.86	2096.43	1987.16	1809.84
ENSMUSG00000023008	1836.71	1908.12	2021.82	1820.89	1681.53	1685.39
ENSMUSG00000069237	1873.61	1798.16	1758.83	1874.84	1964.1	1773.36
ENSMUSG00000030168	1773.16	1843.44	1923.96	1865.21	1764.57	1814.13
ENSMUSG00000028273	1707.56	1701.14	1847.95	2013.57	1804.94	1936.43
ENSMUSG00000041879	1831.58	1776.91	1817.37	1895.07	1795.71	1891.37
ENSMUSG00000042644	1858.23	1794.47	1708.15	1922.05	1914.5	1824.86
ENSMUSG00000022051	1662.47	1687.28	1632.13	2017.43	2093.27	1970.76
ENSMUSG00000036097	1834.66	1798.16	1736.11	1878.69	1913.35	1847.38
ENSMUSG00000037351	1827.48	1718.69	1823.48	1717.8	2056.36	1881.71
ENSMUSG00000029020	1876.68	1793.54	1830.47	1784.28	1822.24	1875.28
ENSMUSG00000017781	1884.88	1788	1926.58	1889.29	1747.27	1706.85
ENSMUSG00000078671	1804.93	1781.53	1852.32	1910.49	1771.49	1843.09
ENSMUSG00000056737	1850.03	1814.79	1944.06	1773.68	1874.14	1698.26
ENSMUSG00000039191	1886.93	1654.94	1807.76	1895.07	1869.52	1879.57
ENSMUSG00000004936	1755.74	1767.67	1692.42	1931.68	1913.35	1941.79
ENSMUSG00000034312	1779.31	1812.95	1832.22	1732.25	1947.95	1879.57
ENSMUSG00000005625	1906.4	1948.78	1840.08	1663.85	1789.94	1779.8
ENSMUSG00000022186	1737.29	1709.45	1848.82	1973.11	1815.32	1848.46
ENSMUSG00000026718	1762.91	1881.32	1828.72	1813.18	1708.06	1922.48
ENSMUSG00000022897	1891.03	1928.45	1743.1	1863.28	1770.34	1724.01
ENSMUSG00000046169	1761.89	1779.68	1748.34	1966.37	1759.96	1916.04
ENSMUSG00000027499	1754.71	1774.14	1828.72	1928.79	1847.61	1783.02
ENSMUSG00000001467	1752.66	1617.05	1658.35	2024.17	1832.62	2075.89
ENSMUSG00000026034	1742.41	1812.02	1842.7	1956.73	1759.96	1773.36
ENSMUSG00000030403	1959.7	1774.14	1758.83	1693.71	1907.58	1844.17
ENSMUSG00000028927	1547.67	1529.27	1348.17	2106.06	2255.88	2271.15
ENSMUSG00000022337	1714.74	1783.38	1822.61	1886.4	1922.58	1762.63
ENSMUSG00000019943	1765.99	1595.8	1614.66	2070.42	1904.12	1992.21
ENSMUSG00000031024	1651.19	1863.77	1926.58	1799.69	1757.65	1852.75
ENSMUSG00000066571	1824.41	1754.73	1755.33	1848.83	1909.89	1806.62
ENSMUSG00000022350	1737.29	1785.22	1702.03	2029.95	1811.86	1815.2
ENSMUSG00000064193	1814.16	1792.62	1838.34	1583.88	1942.18	1929.99
ENSMUSG00000055850	1865.41	1841.59	1837.46	1642.65	1817.62	1855.97
ENSMUSG00000038095	1707.56	1831.43	1746.59	1860.39	1836.08	1878.5
ENSMUSG00000033209	1958.68	1826.81	1854.94	1720.69	1697.68	1770.14
ENSMUSG00000042744	1851.06	1824.96	1807.76	1664.81	1759.96	1938.57
ENSMUSG00000050621	1652.22	1725.16	1718.63	1910.49	1951.41	1918.19
ENSMUSG00000042035	1853.11	1762.12	1913.48	1825.7	1620.41	1825.93
ENSMUSG00000023186	1737.29	1709.45	1790.28	1948.06	1851.07	1803.4
ENSMUSG00000097815	1723.96	1807.4	1795.52	1837.27	1810.7	1853.82
ENSMUSG00000022433	1769.06	1756.58	1951.92	1711.06	1758.81	1860.26
ENSMUSG00000051790	1780.34	1811.1	1673.2	1750.56	1882.21	1954.67
ENSMUSG00000036751	1826.46	1783.38	1861.93	1579.07	1885.67	1887.08
ENSMUSG00000040652	1781.36	1785.22	1786.79	1868.1	1787.64	1793.74
ENSMUSG00000032402	1928.95	1937.69	1955.42	1644.58	1576.58	1697.19
ENSMUSG00000022280	1794.68	1828.65	1745.72	1819.92	1708.06	1899.95
ENSMUSG00000033295	2040.67	1863.77	1662.72	1726.47	1652.7	1845.24
ENSMUSG00000027206	1810.06	1736.25	1749.22	1864.24	1878.75	1752.98
ENSMUSG00000029148	1907.43	1806.48	1809.5	1708.17	1756.5	1783.02
ENSMUSG00000026491	1765.99	1825.88	1871.54	1830.52	1724.21	1715.43
ENSMUSG00000091896	1777.26	1800.01	1837.46	1829.56	1732.28	1768
ENSMUSG00000027365	1676.82	1850.83	1690.68	1997.2	1777.26	1759.41
ENSMUSG00000043067	1655.29	1703.91	1629.51	2039.59	1891.44	1874.2
ENSMUSG00000031563	1847.98	1823.11	1731.74	1875.8	1741.51	1718.65
ENSMUSG00000038965	1686.04	1849.91	1770.18	1885.44	1794.56	1742.25
ENSMUSG00000027035	1739.34	1667.87	1651.36	1984.67	1807.24	1921.41
ENSMUSG00000034602	1783.41	1825.88	1652.23	1830.52	1889.13	1781.94
ENSMUSG00000037234	1737.29	1702.99	1693.3	2007.79	1806.09	1786.23
ENSMUSG00000049106	1685.02	1789.85	1734.36	1777.53	1872.98	1881.71
ENSMUSG00000053062	1820.31	1823.11	1746.59	1801.62	1764.57	1758.34
ENSMUSG00000026456	1831.58	1717.77	1806.01	1761.15	1800.32	1807.69
ENSMUSG00000019471	1870.53	1739.95	1782.42	1619.53	1869.52	1854.89
ENSMUSG00000032745	1827.48	1759.35	1757.08	1773.68	1676.92	1909.61
ENSMUSG00000029247	1801.86	1686.35	1731.74	1860.39	1821.08	1815.2
ENSMUSG00000029185	1701.41	1718.69	1659.22	1976	1872.98	1792.67
ENSMUSG00000020439	1816.21	1736.25	1728.25	1781.39	1837.23	1811.98
ENSMUSG00000048264	1575.35	1659.56	1702.91	1994.31	1840.69	1937.5
ENSMUSG00000023495	1982.25	1850.83	1858.43	1615.68	1714.98	1636.04
ENSMUSG00000013858	1855.16	1881.32	1928.33	1498.14	1710.37	1781.94
ENSMUSG00000042485	1743.44	1680.81	1778.05	1651.32	1924.88	1946.08
ENSMUSG00000040549	1738.31	1726.09	1689.8	1945.17	1708.06	1877.42
ENSMUSG00000029344	1856.18	1861	1917.85	1515.48	1701.14	1799.11
ENSMUSG00000031622	1668.62	1865.62	1803.39	1743.81	1769.19	1807.69
ENSMUSG00000061878	1693.21	1738.1	1821.74	1783.31	1879.9	1741.18
ENSMUSG00000028953	1822.36	1699.29	1756.21	1734.18	1774.95	1882.79
ENSMUSG00000038545	1828.51	1809.25	1770.18	1690.82	1747.27	1794.82
ENSMUSG00000025404	1874.63	1709.45	1668.83	1796.8	1801.48	1817.35
ENSMUSG00000029093	1883.86	1928.45	1813.87	1612.79	1713.83	1659.64
ENSMUSG00000040354	1778.29	1860.07	1702.03	1708.17	1894.9	1708.99
ENSMUSG00000032560	1739.34	1775.06	1672.33	1938.43	1724.21	1781.94
ENSMUSG00000061130	1822.36	1778.76	1687.18	1815.11	1804.94	1734.74
ENSMUSG00000032648	1705.51	1637.38	1536.9	1859.42	1937.57	2031.91
ENSMUSG00000062762	1816.21	1806.48	1799.02	1698.53	1680.38	1813.05
ENSMUSG00000077450	1843.88	1825.88	1770.18	1715.87	1709.21	1726.16
ENSMUSG00000031532	1697.31	1762.12	1688.93	1776.57	1791.1	1908.53
ENSMUSG00000031253	1811.08	1919.21	1819.99	1754.41	1665.39	1580.25
ENSMUSG00000030286	1762.91	1813.87	1761.45	1719.73	1755.35	1773.36
ENSMUSG00000068329	1886.93	1907.2	1890.76	1590.63	1627.33	1623.17
ENSMUSG00000026469	1667.59	1602.27	1613.79	1943.24	1784.18	2007.23
ENSMUSG00000026305	1669.64	1694.67	1742.23	1832.45	1801.48	1845.24
ENSMUSG00000034120	1913.58	1749.19	1872.41	1784.28	1622.71	1581.33
ENSMUSG00000035545	1810.06	1641.08	1930.08	1733.22	1755.35	1672.52
ENSMUSG00000031835	1830.56	1795.39	1774.55	1741.89	1615.79	1778.72
ENSMUSG00000019647	1717.81	1739.02	1667.96	1770.79	1795.71	1887.08
ENSMUSG00000004885	1738.31	1698.37	1891.63	1686.97	1784.18	1740.1
ENSMUSG00000038403	1559.97	1489.54	1511.56	1906.63	1981.4	2200.34
ENSMUSG00000030095	1744.46	1810.17	1782.42	1605.08	1840.69	1766.92
ENSMUSG00000014498	1809.03	1713.15	1792.03	1702.39	1729.97	1786.23
ENSMUSG00000020250	1781.36	1674.34	1653.1	1713.95	1961.79	1801.25
ENSMUSG00000012535	1642.99	1762.12	1742.23	1791.02	1739.2	1854.89
ENSMUSG00000037139	1704.49	1629.06	1511.56	1757.3	1983.7	2038.35
ENSMUSG00000003518	1759.84	1732.56	1648.74	1828.59	1742.66	1835.58
ENSMUSG00000011958	1741.39	1805.55	1814.75	1901.82	1601.95	1609.22
ENSMUSG00000024835	1791.61	1840.67	1804.26	1663.85	1719.59	1682.17
ENSMUSG00000071054	1717.81	1747.34	1777.17	1847.86	1754.19	1663.93
ENSMUSG00000024483	1769.06	1740.87	1716.89	1863.28	1709.21	1716.5
ENSMUSG00000071650	1798.78	1722.39	1720.38	1805.47	1688.45	1781.94
ENSMUSG00000034751	1723.96	1658.63	1554.37	1956.73	1703.45	1953.59
ENSMUSG00000039953	1744.46	1774.14	1750.96	1752.48	1703.45	1773.36
ENSMUSG00000068882	1661.44	1756.58	1796.4	1795.84	1817.62	1658.57
ENSMUSG00000032612	1819.28	1748.26	1688.05	1728.4	1735.74	1785.16
ENSMUSG00000030623	1683.99	1624.44	1711.64	1846.9	1766.88	1877.42
ENSMUSG00000026596	1618.39	1695.59	1739.6	1860.39	1744.97	1828.07
ENSMUSG00000033237	1662.47	1836.05	1736.98	1800.66	1736.89	1695.04
ENSMUSG00000038467	1709.61	1688.2	1776.3	1766.94	1780.72	1764.78
ENSMUSG00000045767	1779.31	1828.65	1633.88	1778.5	1711.52	1748.69
ENSMUSG00000036580	1774.19	1739.95	1638.25	1784.28	1789.94	1772.29
ENSMUSG00000058230	1667.59	1782.45	1813.87	1748.63	1691.91	1748.69
ENSMUSG00000019432	1891.03	1753.81	1828.72	1586.77	1817.62	1584.55
ENSMUSG00000060675	1665.54	1691.9	1745.72	1795.84	1817.62	1757.27
ENSMUSG00000022890	1728.06	1805.55	1699.41	1719.73	1729.97	1779.8
ENSMUSG00000024122	1731.14	1721.47	1670.58	1785.24	1709.21	1850.6
ENSMUSG00000040945	1752.66	1672.49	1851.44	1648.43	1798.02	1722.94
ENSMUSG00000043019	1595.84	1800.93	1556.12	2016.46	1739.2	1742.25
ENSMUSG00000005034	1813.13	1650.32	1660.09	1824.74	1686.15	1816.27
ENSMUSG00000050390	1776.24	1826.81	1710.77	1609.9	1748.43	1763.71
ENSMUSG00000026867	1743.44	1778.76	1598.06	1893.14	1650.39	1762.63
ENSMUSG00000063888	1735.24	1759.35	1833.09	1706.24	1675.77	1681.1
ENSMUSG00000027067	1750.61	1684.51	1767.56	1812.22	1665.39	1721.87
ENSMUSG00000035992	1669.64	1606.89	1665.34	1994.31	1776.1	1713.28
ENSMUSG00000049354	1677.84	1704.83	1806.88	1686.97	1726.51	1800.18
ENSMUSG00000021156	1683.99	1710.38	1732.61	1830.52	1672.31	1765.85
ENSMUSG00000005442	1706.54	1726.09	1801.64	1611.82	1772.65	1785.16
ENSMUSG00000026103	1584.57	1637.38	1648.74	1959.62	1821.08	1769.07
ENSMUSG00000054277	1628.64	1617.05	1734.36	1691.79	1928.34	1824.86
ENSMUSG00000025757	1697.31	1644.77	1612.04	1821.85	1806.09	1837.73
ENSMUSG00000022770	1718.84	1629.99	1773.68	1893.14	1668.85	1682.17
ENSMUSG00000007041	1812.11	1721.47	1785.04	1715.87	1750.73	1581.33
ENSMUSG00000012296	1974.05	1946.93	1930.95	1349.77	1553.52	1555.58
ENSMUSG00000027255	1719.86	1715	1706.4	1769.83	1619.25	1825.93
ENSMUSG00000033671	1666.57	1681.73	1574.47	1918.19	1763.42	1780.87
ENSMUSG00000027848	1795.71	1707.61	1759.7	1765.01	1718.44	1582.4
ENSMUSG00000018476	1720.89	1672.49	1744.85	1639.76	1703.45	1869.91
ENSMUSG00000038619	1646.07	1687.28	1640.87	1773.68	1807.24	1811.98
ENSMUSG00000035093	1686.04	1726.09	1660.09	1826.67	1719.59	1724.01
ENSMUSG00000002010	1675.79	1696.52	1704.65	1624.35	1785.33	1876.35
ENSMUSG00000064145	1831.58	1702.99	1776.3	1610.86	1728.82	1683.24
ENSMUSG00000026701	1812.11	1639.23	1699.41	1692.75	1815.32	1681.1
ENSMUSG00000024070	1610.19	1774.14	1593.69	1871.95	1802.63	1669.3
ENSMUSG00000021374	1616.34	1756.58	1749.22	1752.48	1603.11	1808.76
ENSMUSG00000055762	1607.12	1696.52	1754.46	1750.56	1717.29	1768
ENSMUSG00000026674	1706.54	1699.29	1589.32	1749.59	1778.41	1806.62
ENSMUSG00000044477	1804.93	1690.05	1766.69	1589.66	1679.23	1759.41
ENSMUSG00000037119	1682.97	1745.49	1703.78	1870.99	1546.6	1707.92
ENSMUSG00000036779	1692.19	1763.97	1653.1	1745.74	1753.04	1684.32
ENSMUSG00000006498	1756.76	1728.86	1710.77	1665.77	1684.99	1721.87
ENSMUSG00000033499	1672.72	1629.06	1633.01	1850.75	1759.96	1741.18
ENSMUSG00000034667	1754.71	1767.67	1676.7	1681.19	1618.1	1759.41
ENSMUSG00000028367	1698.34	1675.27	1842.7	1698.53	1706.91	1616.73
ENSMUSG00000041731	1531.27	1535.74	1448.65	1811.25	1938.72	2096.28
ENSMUSG00000018906	1548.7	1544.98	1549.13	1728.4	1997.54	1971.83
ENSMUSG00000031924	1738.31	1629.99	1736.11	1804.51	1644.63	1676.81
ENSMUSG00000053929	1878.73	1700.21	1819.99	1552.09	1575.43	1680.03
ENSMUSG00000097461	1670.67	1718.69	1662.72	1855.57	1673.46	1639.26
ENSMUSG00000005148	1706.54	1820.34	1739.6	1602.19	1644.63	1697.19
ENSMUSG00000003500	1706.54	1697.44	1720.38	1587.74	1846.46	1690.75
ENSMUSG00000019726	1508.72	1631.84	1536.02	2067.53	1679.23	1814.13
ENSMUSG00000027665	1702.44	1691.9	1645.24	1823.78	1725.36	1632.82
ENSMUSG00000017421	1826.46	1819.41	1694.17	1698.53	1629.63	1518.03
ENSMUSG00000027465	1730.11	1712.23	1700.29	1665.77	1739.2	1667.15
ENSMUSG00000041645	1689.12	1700.21	1609.42	1737.07	1786.48	1708.99
ENSMUSG00000032594	1614.29	1796.31	1668.83	1660.96	1739.2	1731.52
ENSMUSG00000039477	1707.56	1916.44	1811.25	1658.07	1422.04	1607.07
ENSMUSG00000001270	1584.57	1499.7	1540.39	1697.57	1919.12	2038.35
ENSMUSG00000058881	1779.31	1702.99	1687.18	1641.69	1604.26	1759.41
ENSMUSG00000030319	1762.91	1662.33	1744.85	1515.48	1753.04	1740.1
ENSMUSG00000029108	1698.34	1610.58	1722.13	1765.01	1642.32	1706.85
ENSMUSG00000004264	1696.29	1745.49	1759.7	1588.7	1708.06	1634.97
ENSMUSG00000020267	1632.74	1780.6	1750.09	1679.26	1665.39	1606
ENSMUSG00000041075	1778.29	1745.49	1716.89	1556.91	1653.85	1680.03
ENSMUSG00000002496	1770.09	1650.32	1690.68	1640.73	1650.39	1731.52
ENSMUSG00000052928	1672.72	1594.87	1586.7	1596.41	1743.81	1984.7
ENSMUSG00000032363	1615.32	1696.52	1768.44	1658.07	1729.97	1645.7
ENSMUSG00000036644	1746.51	1722.39	1676.7	1638.8	1646.93	1687.54
ENSMUSG00000038773	1673.74	1629.06	1718.63	1676.37	1658.47	1765.85
ENSMUSG00000035851	1744.46	1648.47	1736.98	1778.5	1734.59	1459.03
ENSMUSG00000003363	1752.66	1714.07	1792.9	1592.55	1601.95	1633.89
ENSMUSG00000049323	1650.17	1769.52	1533.4	1802.58	1743.81	1627.46
ENSMUSG00000006728	1689.12	1701.14	1787.66	1637.84	1684.99	1587.76
ENSMUSG00000038429	1675.79	1687.28	1709.02	1688.9	1705.75	1632.82
ENSMUSG00000039840	1620.44	1600.42	1593.69	1761.15	1768.03	1789.45
ENSMUSG00000033420	1597.89	1741.8	1755.33	1815.11	1548.9	1593.13
ENSMUSG00000035248	1667.59	1618.9	1676.7	1894.11	1591.57	1628.53
ENSMUSG00000022641	1550.75	1650.32	1529.91	1867.13	1837.23	1678.95
ENSMUSG00000042197	1609.17	1642	1640	1976.96	1592.73	1597.42
ENSMUSG00000061518	1737.29	1759.35	1763.19	1475.02	1679.23	1651.06
ENSMUSG00000034926	1665.54	1549.6	1574.47	1697.57	1738.05	1892.44
ENSMUSG00000021690	1635.82	1838.82	1543.01	1763.08	1644.63	1640.33
ENSMUSG00000021890	1729.09	1617.05	1700.29	1701.42	1679.23	1633.89
ENSMUSG00000017400	1714.74	1549.6	1560.49	1581.96	1879.9	1842.02
ENSMUSG00000033159	1812.11	1855.45	1753.58	1510.66	1630.79	1454.73
ENSMUSG00000074398	1805.96	1828.65	1727.37	1414.32	1673.46	1585.62
ENSMUSG00000022387	1701.41	1600.42	1778.05	1657.1	1676.92	1616.73
ENSMUSG00000029221	1605.07	1579.17	1633.01	1734.18	1683.84	1827
ENSMUSG00000037012	1518.97	1595.8	1570.1	1726.47	1785.33	1888.15
ENSMUSG00000031667	1593.79	1644.77	1622.52	1693.71	1773.8	1733.67
ENSMUSG00000020198	1727.04	1757.5	1797.27	1524.15	1614.64	1583.47
ENSMUSG00000062373	1710.64	1624.44	1641.75	1711.06	1675.77	1668.22
ENSMUSG00000052926	1741.39	1779.68	1699.41	1529.93	1703.45	1540.56
ENSMUSG00000034300	1683.99	1683.58	1648.74	1672.52	1578.89	1727.23
ENSMUSG00000057561	1557.92	1690.05	1625.14	1828.59	1655.01	1629.6
ENSMUSG00000009112	1689.12	1689.13	1725.62	1548.24	1687.3	1651.06
ENSMUSG00000026116	1726.01	1633.68	1534.28	1696.6	1683.84	1737.96
ENSMUSG00000031808	1584.57	1715	1678.44	1593.52	1642.32	1763.71
ENSMUSG00000030770	1609.17	1620.75	1741.35	1733.22	1608.87	1641.4
ENSMUSG00000038521	1625.57	1682.66	1746.59	1708.17	1668.85	1515.89
ENSMUSG00000002844	1680.92	1713.15	1608.54	1602.19	1478.55	1880.64
ENSMUSG00000033938	1795.71	1788.92	1698.54	1491.39	1620.41	1547
ENSMUSG00000055670	1672.72	1700.21	1621.65	1730.32	1524.68	1688.61
ENSMUSG00000070493	1755.74	1654.94	1718.63	1562.69	1657.31	1587.76
ENSMUSG00000001909	1659.39	1614.28	1764.94	1562.69	1640.01	1687.54
ENSMUSG00000035776	1621.47	1604.12	1473.12	1701.42	1826.85	1768
ENSMUSG00000006403	1770.09	1837.89	1832.22	1466.34	1491.24	1472.97
ENSMUSG00000027423	1698.34	1602.27	1575.34	1781.39	1678.07	1608.15
ENSMUSG00000020290	1659.39	1752.88	1603.3	1728.4	1644.63	1526.61
ENSMUSG00000017428	1662.47	1581.01	1627.77	1717.8	1615.79	1731.52
ENSMUSG00000022507	1649.14	1681.73	1601.55	1844.01	1619.25	1515.89
ENSMUSG00000002365	1635.82	1660.48	1629.51	1741.89	1619.25	1631.75
ENSMUSG00000001870	1584.57	1607.81	1720.38	1620.49	1608.87	1758.34
ENSMUSG00000028960	1574.32	1689.13	1567.48	1601.22	1728.82	1758.34
ENSMUSG00000050310	1630.69	1573.62	1523.79	1807.4	1774.95	1612.44
ENSMUSG00000000126	1633.77	1661.4	1683.69	1670.59	1596.19	1623.17
ENSMUSG00000021012	1624.54	1595.8	1589.32	1715.87	1758.81	1617.8
ENSMUSG00000019907	1623.52	1611.51	1576.22	1759.23	1673.46	1646.77
ENSMUSG00000031734	1598.92	1575.47	1688.05	1548.24	1699.99	1785.16
ENSMUSG00000036323	1620.44	1630.91	1626.89	1739.96	1631.94	1622.09
ENSMUSG00000043639	1572.27	1514.48	1559.61	1795.84	1771.49	1697.19
ENSMUSG00000004267	1402.13	1512.64	1418.94	1699.5	2011.38	1920.34
ENSMUSG00000066551	1611.22	1654.01	1679.32	1676.37	1675.77	1549.14
ENSMUSG00000031353	1578.42	1583.79	1646.99	1739	1686.15	1610.29
ENSMUSG00000090213	1579.45	1667.87	1608.54	1587.74	1727.67	1688.61
ENSMUSG00000025255	1703.46	1611.51	1592.82	1771.75	1554.67	1596.35
ENSMUSG00000018160	1522.05	1721.47	1541.27	1746.7	1629.63	1677.88
ENSMUSG00000003068	1708.59	1669.72	1696.79	1468.27	1657.31	1625.31
ENSMUSG00000061589	1680.92	1785.22	1590.2	1583.88	1533.91	1633.89
ENSMUSG00000025034	1863.36	1751.04	1680.19	1447.08	1475.09	1579.18
ENSMUSG00000029762	1616.34	1711.3	1659.22	1672.52	1610.03	1521.25
ENSMUSG00000001627	1730.11	1642	1665.34	1613.75	1546.6	1597.42
ENSMUSG00000033943	1624.54	1618.9	1661.84	1755.37	1484.32	1633.89
ENSMUSG00000020216	1697.31	1588.41	1716.89	1470.2	1605.41	1724.01
ENSMUSG00000018001	1541.52	1623.52	1571.85	1662.88	1653.85	1762.63
ENSMUSG00000069729	1688.09	1570.85	1696.79	1609.9	1558.13	1634.97
ENSMUSG00000020923	1620.44	1744.57	1720.38	1581.96	1515.46	1544.85
ENSMUSG00000020716	1642.99	1679.89	1497.58	1755.37	1576.58	1615.66
ENSMUSG00000026640	1635.82	1624.44	1548.26	1675.41	1625.02	1666.08
ENSMUSG00000027852	1572.27	1691.9	1639.12	1647.47	1600.8	1593.13
ENSMUSG00000021840	1635.82	1605.96	1670.58	1696.6	1567.35	1563.09
ENSMUSG00000040021	1577.4	1607.81	1563.11	1832.45	1540.83	1626.38
ENSMUSG00000024617	1582.52	1577.32	1472.24	1609.9	1758.81	1804.47
ENSMUSG00000022324	1593.79	1532.04	1605.92	1695.64	1670	1666.08
ENSMUSG00000033788	1554.85	1548.67	1604.18	1696.6	1636.55	1715.43
ENSMUSG00000081534	1633.77	1582.86	1600.68	1587.74	1658.47	1696.12
ENSMUSG00000031529	1575.35	1710.38	1557.87	1639.76	1592.73	1662.86
ENSMUSG00000027282	1704.49	1545.9	1653.98	1626.27	1604.26	1599.56
ENSMUSG00000020611	1573.3	1703.91	1602.43	1696.6	1565.05	1573.82
ENSMUSG00000029657	1632.74	1598.57	1556.99	1722.62	1613.49	1613.51
ENSMUSG00000015120	1535.37	1718.69	1619.03	1633.02	1563.9	1636.04
ENSMUSG00000021610	1667.59	1592.1	1691.55	1565.58	1719.59	1485.85
ENSMUSG00000020864	1653.24	1633.68	1587.57	1572.32	1599.65	1684.32
ENSMUSG00000044086	1638.89	1655.86	1643.49	1530.89	1635.4	1612.44
ENSMUSG00000021870	1538.45	1643.85	1563.98	1752.48	1595.03	1617.8
ENSMUSG00000085348	1529.22	1645.7	1455.64	1659.99	1765.73	1700.41
ENSMUSG00000039515	1646.07	1620.75	1643.49	1601.22	1563.9	1628.53
ENSMUSG00000011960	1530.25	1624.44	1598.06	1676.37	1610.03	1673.59
ENSMUSG00000003812	1600.97	1697.44	1847.95	1401.79	1552.36	1567.38
ENSMUSG00000044674	1657.34	1570.85	1707.28	1678.3	1455.48	1609.22
ENSMUSG00000022957	1611.22	1575.47	1668.83	1696.6	1547.75	1585.62
ENSMUSG00000032220	1590.72	1581.94	1546.51	1770.79	1593.88	1619.95
ENSMUSG00000002222	1518.97	1546.83	1510.69	1690.82	1689.61	1776.58
ENSMUSG00000019889	1496.42	1535.74	1589.32	1692.75	1667.69	1732.59
ENSMUSG00000035299	1683.99	1868.39	1644.37	1432.62	1524.68	1495.5
ENSMUSG00000025066	1528.2	1551.45	1627.77	1696.6	1690.76	1596.35
ENSMUSG00000022789	1484.13	1632.76	1555.25	1835.34	1608.87	1543.78
ENSMUSG00000020027	1585.6	1636.46	1604.18	1622.42	1608.87	1610.29
ENSMUSG00000024049	1540.5	1459.97	1392.73	1729.36	1736.89	1883.86
ENSMUSG00000033124	1718.84	1587.48	1521.17	1437.44	1638.86	1802.33
ENSMUSG00000000194	1627.62	1558.84	1532.53	1656.14	1635.4	1661.79
ENSMUSG00000041773	1578.42	1594.87	1685.43	1669.63	1499.31	1594.2
ENSMUSG00000052040	1539.47	1583.79	1614.66	1592.55	1638.86	1689.68
ENSMUSG00000031029	1641.97	1483.99	1653.1	1409.5	1783.02	1716.5
ENSMUSG00000006931	1705.51	1622.6	1588.45	1572.32	1543.14	1610.29
ENSMUSG00000051510	1569.2	1564.38	1569.23	1621.46	1663.08	1676.81
ENSMUSG00000032449	1495.4	1508.02	1640.87	1740.92	1595.03	1655.35
ENSMUSG00000028668	1623.52	1434.09	1584.08	1625.31	1627.33	1765.85
ENSMUSG00000015291	1528.2	1610.58	1630.39	1649.4	1633.09	1570.6
ENSMUSG00000082286	1493.35	1640.15	1647.86	1549.2	1643.47	1648.91
ENSMUSG00000021373	1584.57	1575.47	1479.23	1659.03	1650.39	1703.63
ENSMUSG00000028932	1666.57	1604.12	1661.84	1603.15	1530.45	1533.05
ENSMUSG00000005354	1708.59	1592.1	1661.84	1557.87	1503.92	1577.04
ENSMUSG00000034928	1705.51	1571.77	1750.96	1472.12	1525.84	1565.23
ENSMUSG00000004591	1564.07	1643.85	1609.42	1663.85	1515.46	1598.49
ENSMUSG00000027406	1497.45	1604.12	1540.39	1558.83	1720.75	1724.01
ENSMUSG00000028309	1626.59	1527.42	1664.46	1757.3	1403.58	1596.35
ENSMUSG00000027404	1715.76	1633.68	1662.72	1437.44	1544.29	1606
ENSMUSG00000038406	1760.86	1560.69	1537.77	1485.61	1640.01	1653.21
ENSMUSG00000024190	1789.56	1583.79	1681.06	1369.04	1550.06	1631.75
ENSMUSG00000059743	1495.4	1473.83	1565.73	1638.8	1763.42	1706.85
ENSMUSG00000020846	1553.82	1524.65	1724.75	1644.58	1583.5	1552.36
ENSMUSG00000030353	1629.67	1538.51	1429.43	1595.44	1663.08	1798.04
ENSMUSG00000032580	1520	1642	1598.93	1643.62	1666.54	1526.61
ENSMUSG00000000088	1622.49	1715	1600.68	1509.7	1569.66	1563.09
ENSMUSG00000052337	1506.67	1579.17	1499.33	1685.04	1615.79	1726.16
ENSMUSG00000032481	1630.69	1579.17	1516.8	1629.16	1623.87	1624.24
ENSMUSG00000042772	1535.37	1563.46	1520.3	1693.71	1563.9	1712.21
ENSMUSG00000055239	1604.04	1661.4	1571.85	1583.88	1559.28	1574.89
ENSMUSG00000031543	1627.62	1442.41	1584.08	1578.1	1664.23	1697.19
ENSMUSG00000018379	1598.92	1717.77	1648.74	1637.84	1416.27	1480.48
ENSMUSG00000047747	1538.45	1599.49	1643.49	1688.9	1544.29	1510.52
ENSMUSG00000076432	1494.37	1678.96	1596.31	1697.57	1591.57	1467.61
ENSMUSG00000005973	1551.77	1572.7	1695.04	1664.81	1486.62	1543.78
ENSMUSG00000025212	1674.77	1603.19	1604.18	1626.27	1524.68	1496.57
ENSMUSG00000050697	1644.02	1466.43	1565.73	1700.46	1586.96	1592.05
ENSMUSG00000079442	1576.37	1509.86	1574.47	1558.83	1678.07	1667.15
ENSMUSG00000004846	1589.7	1571.77	1544.76	1599.3	1619.25	1617.8
ENSMUSG00000032199	1691.17	1557.91	1591.07	1566.54	1611.18	1510.52
ENSMUSG00000035726	1497.45	1562.53	1590.2	1753.45	1555.82	1541.63
ENSMUSG00000026202	1439.03	1338.92	1537.77	1714.91	1612.33	1914.97
ENSMUSG00000022094	1429.8	1622.6	1520.3	1580.99	1673.46	1705.77
ENSMUSG00000040254	1470.8	1614.28	1514.18	1734.18	1565.05	1606
ENSMUSG00000031167	1574.32	1542.21	1647.86	1761.15	1559.28	1386.07
ENSMUSG00000024248	1505.65	1504.32	1522.04	1639.76	1704.6	1656.42
ENSMUSG00000031711	1468.75	1651.24	1623.4	1596.41	1634.25	1506.23
ENSMUSG00000037475	1449.28	1591.18	1502.82	1815.11	1473.94	1645.7
ENSMUSG00000040433	1521.02	1436.87	1544.76	1690.82	1598.49	1720.79
ENSMUSG00000043535	1615.32	1552.37	1527.29	1685.04	1541.98	1563.09
ENSMUSG00000078965	1455.43	1538.51	1300.12	1607.97	2135.94	1556.65
ENSMUSG00000034850	1524.1	1665.1	1688.93	1599.3	1409.35	1542.71
ENSMUSG00000032412	1473.88	1556.07	1548.26	1580.03	1601.95	1730.45
ENSMUSG00000000538	1500.52	1583.79	1477.48	1512.59	1735.74	1702.55
ENSMUSG00000028603	1515.9	1502.47	1563.11	1608.93	1712.67	1582.4
ENSMUSG00000041133	1507.7	1496	1541.27	1706.24	1627.33	1594.2
ENSMUSG00000041341	1531.27	1555.14	1450.4	1669.63	1613.49	1663.93
ENSMUSG00000020288	1624.54	1562.53	1537.77	1622.42	1554.67	1553.43
ENSMUSG00000003345	1622.49	1622.6	1679.32	1381.56	1599.65	1535.2
ENSMUSG00000026031	1634.79	1591.18	1506.32	1766.94	1462.4	1462.24
ENSMUSG00000025702	1530.25	1533.89	1491.46	1708.17	1597.34	1596.35
ENSMUSG00000002455	1613.27	1504.32	1584.95	1577.14	1683.84	1491.21
ENSMUSG00000040268	1574.32	1582.86	1530.78	1612.79	1484.32	1642.48
ENSMUSG00000029578	1597.89	1525.57	1552.63	1603.15	1663.08	1495.5
ENSMUSG00000005779	1576.37	1606.89	1509.81	1478.87	1585.81	1678.95
ENSMUSG00000046836	1576.37	1625.37	1498.45	1501.99	1539.68	1687.54
ENSMUSG00000039671	1572.27	1547.75	1614.66	1534.75	1610.03	1536.27
ENSMUSG00000019362	1637.87	1588.41	1598.06	1383.49	1607.72	1609.22
ENSMUSG00000041935	1504.62	1556.07	1475.74	1679.26	1623.87	1587.76
ENSMUSG00000005802	1464.65	1532.96	1515.05	1748.63	1490.08	1648.91
ENSMUSG00000033039	1584.57	1574.55	1627.77	1496.21	1536.22	1572.74
ENSMUSG00000004937	1595.84	1528.34	1577.09	1523.19	1517.76	1654.28
ENSMUSG00000035666	1524.1	1574.55	1570.97	1599.3	1547.75	1569.53
ENSMUSG00000028333	1592.77	1489.54	1677.57	1608.93	1560.44	1441.86
ENSMUSG00000027962	1438	1522.8	1446.03	1691.79	1631.94	1682.17
ENSMUSG00000089715	1574.32	1544.98	1688.05	1453.82	1648.09	1459.03
ENSMUSG00000024759	1565.1	1642	1466.13	1733.22	1434.72	1511.59
ENSMUSG00000000223	1514.87	1584.71	1520.3	1602.19	1560.44	1587.76
ENSMUSG00000026123	1479	1579.17	1400.6	1571.36	1664.23	1716.5
ENSMUSG00000020708	1615.32	1683.58	1587.57	1465.38	1483.16	1504.08
[truncated: 20,009 more rows]
